# Supplementary material for: Robust cullin-RING ligase function is established by a multiplicity of poly-ubiquitylation pathways
Source: eLife. 2019 Dec 23;8:e51163. doi: 10.7554/eLife.51163 (PMC6975927; doi:10.7554/eLife.51163)
Supplement: Appendix 2—figure 2—source data 1. [file elife-51163-app2-fig2-data1.xlsx]

## Sheet: theoretical MW
	MW (Da)
UBE2D3	17020
UBE2L3	18005
UBE2R2	27091
UBE2G1	19565
human UBIQUITIN	8564
DTT	154
Glutathione	307
H20	18
UBE2D3~UB (minus H20)	25566
UB~DTT (minus H20)	8700
UBE2L3~UB (minus H20)	26551
UBE2L3~UB-Gluathione (minus H20)	26858
UBE2R2~UB (minus H20)	35637
UBE2G1~UB (minus H20)	28111
UBE2G1~UB-Glutathione (minus H20)	28418

## Sheet: UBE2D3
Components found by Mass Spec	Putative Identification	Theo. MW	Obs. MW	Difference from theoretical mass (Da)	Abundance	UBE2D3~UB/UBE2D3 total
A	UBE2D3~UB (minus H20)	25566	25566.5	<1	257741	0.52
B	UBE2D3	17020	17020	<1	240343
C	UB~DTT (minus H20)	8700	8700.85	<1	33868

## Sheet: UBE2G1
Components found by Mass Spec	Putative Identification	Theo. MW	Obs. MW	Difference from theoretical mass (Da)	Abundance	UBE2G1~UB/UBE2G1 total
A	UBE2G1~UB (minus H20)	28111	28112.3	<2	290143	1
B	human UBIQUITIN	8564	8564.71	<1	146222
C	UB~DTT (minus H20)	8700	8700.85	<1	90554
D	UBE2G1~UB-Glutathione (minus H20)	28418	28417.5	<1	56569

## Sheet: UBE2R2
Components found by Mass Spec	Putative Identification	Theo. MW	Obs. MW	Difference from theoretical mass (Da)	Abundance	UBE2R2~UB/UBE2R2 total
A	human UBIQUITIN	8564	8564.65	<1	474873	1
B	UBE2R2~UB (minus H20)	35637	35637.8	<1	298406

## Sheet: UBE2L3
Components found by Mass Spec	Putative Identification	Theo. MW	Obs. MW	Difference from theoretical mass (Da)	Abundance	UBE2L3~UB/UBE2L3 total
A	UBE2L3~UB (minus H20)	26551	26552.8	<2	285719	0.65
B	UB~DTT (minus H20)	8700	8700.94	<1	223491
C	UBE2L3	18005	18005.9	<1	182611
D	UBE2L3~UB-Gluathione (minus H20)	26858	26857.9	<1	57602
