# Supplementary material for: Robust cullin-RING ligase function is established by a multiplicity of poly-ubiquitylation pathways
Source: eLife. 2019 Dec 23;8:e51163. doi: 10.7554/eLife.51163 (PMC6975927; doi:10.7554/eLife.51163)
Supplement: Figure 1—source data 1. [file elife-51163-fig1-data1.xlsx]

## Sheet: Fig. 1a
ARIH1 concentration	bCAT-1	bCAT-2		cycE-1	cycE-2
5	0.209791	0.363292		0.207277	0.247871
2.5	0.272627	0.311102		0.263425	0.280038
1.25	0.19796	0.219927		0.260405	0.265043
0.625	0.180799	0.145046		0.260326	0.284119
0.3125	0.099813	0.117087		0.240493	0.231261
0.15625	0.089225	0.09137		0.135973	0.142097
0.078125	0.063101	0.068845		0.054239	0.080517
0.039063	0.050166	0.055866		0.021498	0.045596
0.019531	0.036442	0.048884		0.005214	0.02293

## Sheet: Fig. 1b
UBE2D3 concentration	bCAT-1	bCAT-2		cycE-1	cycE-2
30	1.84739	1.71292		0.739485	0.530504
15	1.7953	1.78667		0.792834	0.593043
7.5	1.73769	1.80525		0.719707	0.653906
3.75	1.64049	1.82404		0.746953	0.558439
1.875	1.42255	1.6259		0.479694	0.335143
0.9375	1.34061	1.30572		0.267861	0.18678
0.46875	0.924771	1.05987		0.07478	0.117001
0.234375	0.540882	0.492364		0.038121	0.061935
0.117188	0.175444	0.244701		0.032208	0.039847

## Sheet: Fig. 1c
UBE2R2 concentration	UBbCAT-1	UBbCAT-2		UBcycE-1	UBcycE-2
10	2.97119	3.54263		3.81275	3.28927
5	2.89798	2.93617		3.53497	3.1821
2.5	2.79699	2.84624		3.5287	3.02079
1.25	2.34115	2.76698		3.08676	2.88106
0.625	1.96038	2.50303		2.88021	2.55797
0.3125	1.52071	1.74306		2.03688	1.95381
0.15625	1.05366	1.309		1.16695	1.15321
0.078125	0.509391	0.762462		0.386747	0.34869
0.039063	0.376243	0.357472		0.191239	0.137344
