# Supplementary material for: Robust cullin-RING ligase function is established by a multiplicity of poly-ubiquitylation pathways
Source: eLife. 2019 Dec 23;8:e51163. doi: 10.7554/eLife.51163 (PMC6975927; doi:10.7554/eLife.51163)
Supplement: Figure 2—source data 1. [file elife-51163-fig2-data1.xlsx]

## Sheet: Fig. 2c
time	S1 curve		S1-1 data	S1-2 data	S2 curve		S2-1 data	S2-2 data	S0 curve		S0-1 data	S0-2 data
0	0				0				1
0.025	0.006403		0.008371	0.006266	1.3e-05		0	0.000381	0.993583		0.993196	0.993772
0.05	0.012598		0.010982	0.016462	5.2e-05		0	0.00034	0.987349		0.990474	0.984109
0.075	0.01859		0.015593	0.023161	0.000116		0	0.001101	0.981293		0.985481	0.976068
0.1	0.024385		0.017958	0.02584	0.000204		0	0.001004	0.97541		0.982371	0.974819
0.125	0.02999				0.000315				0.969694
0.15	0.035409				0.000448				0.964142
0.175	0.040648				0.000602				0.958747
0.2	0.045713		0.035388	0.047389	0.000776		0.000918	0.001948	0.953507		0.964495	0.95193
0.225	0.050608				0.00097				0.948415
0.25	0.05534				0.001183				0.943469
0.275	0.059911				0.001414				0.938664
0.3	0.064328		0.05097	0.060819	0.001662		0	0.001991	0.933996		0.949739	0.936607
0.325	0.068595				0.001926				0.929461
0.35	0.072717				0.002206				0.925056
0.375	0.076697				0.002501				0.920776
0.4	0.08054				0.002811				0.916618
0.425	0.08425				0.003135				0.912578
0.45	0.08783				0.003472				0.908654
0.475	0.091286				0.003821				0.904841
0.5	0.09462		0.071978	0.07043	0.004183		0.002262	0.002094	0.901138		0.925876	0.927807
0.525	0.097837				0.004556				0.89754
0.55	0.100939				0.00494				0.894044
0.575	0.10393				0.005334				0.890648
0.6	0.106814				0.005738				0.887349
0.625	0.109594				0.006152				0.884144
0.65	0.112272				0.006575				0.881031
0.675	0.114852				0.007006				0.878006
0.7	0.117337		0.103215	0.166493	0.007445		0.005549	0.0141	0.875067		0.891357	0.818846
0.725	0.11973				0.007892				0.872212
0.75	0.122033				0.008345				0.869439
0.775	0.12425				0.008806				0.866744
0.8	0.126383				0.009273				0.864127
0.825	0.128433				0.009746				0.861584
0.85	0.130405				0.010225				0.859114
0.875	0.1323				0.010709				0.856714
0.9	0.134121				0.011198				0.854382
0.925	0.13587				0.011692				0.852117
0.95	0.137549				0.01219				0.849916
0.975	0.13916				0.012692				0.847779
1	0.140706		0.115589	0.191582	0.013197		0.008156	0.017412	0.845702		0.876602	0.791119
1.025	0.142188				0.013706				0.843684
1.05	0.143608				0.014219				0.841724
1.075	0.144968				0.014734				0.83982
1.1	0.146271				0.015251				0.83797
1.125	0.147518				0.015771				0.836173
1.15	0.14871				0.016293				0.834427
1.175	0.149849				0.016817				0.832731
1.2	0.150938				0.017343				0.831083
1.225	0.151977				0.01787				0.829482
1.25	0.152968				0.018398				0.827927
1.275	0.153913				0.018927				0.826416
1.3	0.154812				0.019457				0.824948
1.325	0.155669				0.019988				0.823523
1.35	0.156483				0.020519				0.822137
1.375	0.157256				0.02105				0.820792
1.4	0.15799				0.021582				0.819484
1.425	0.158686				0.022113				0.818214
1.45	0.159345				0.022644				0.81698
1.475	0.159967				0.023175				0.815781
1.5	0.160556				0.023705				0.814617
1.525	0.16111				0.024235				0.813485
1.55	0.161632				0.024763				0.812386
1.575	0.162123				0.025291				0.811319
1.6	0.162583				0.025818				0.810281
1.625	0.163014				0.026344				0.809274
1.65	0.163416				0.026868				0.808295
1.675	0.163791				0.027391				0.807343
1.7	0.164139				0.027912				0.806419
1.725	0.164462				0.028432				0.805522
1.75	0.164759				0.02895				0.80465
1.775	0.165033				0.029467				0.803803
1.8	0.165283				0.029981				0.80298
1.825	0.165511				0.030493				0.80218
1.85	0.165717				0.031004				0.801403
1.875	0.165902				0.031512				0.800649
1.9	0.166067				0.032018				0.799916
1.925	0.166212				0.032522				0.799203
1.95	0.166338				0.033023				0.798511
1.975	0.166446				0.033522				0.797839
2	0.166537		0.128581	0.202654	0.034018		0.024522	0.047059	0.797186		0.844102	0.746633
2.025	0.16661				0.034512				0.796552
2.05	0.166667				0.035004				0.795936
2.075	0.166708				0.035492				0.795337
2.1	0.166734				0.035978				0.794755
2.125	0.166745				0.036461				0.79419
2.15	0.166742				0.036942				0.793641
2.175	0.166725				0.037419				0.793108
2.2	0.166695				0.037894				0.79259
2.225	0.166652				0.038365				0.792086
2.25	0.166597				0.038834				0.791597
2.275	0.16653				0.0393				0.791122
2.3	0.166452				0.039762				0.790661
2.325	0.166363				0.040222				0.790212
2.35	0.166263				0.040678				0.789777
2.375	0.166153				0.041132				0.789354
2.4	0.166034				0.041582				0.788943
2.425	0.165905				0.042029				0.788543
2.45	0.165767				0.042472				0.788155
2.475	0.16562				0.042913				0.787778
2.5	0.165465				0.04335				0.787412
2.525	0.165302				0.043784				0.787056
2.55	0.165131				0.044215				0.786711
2.575	0.164953				0.044642				0.786375
2.6	0.164768				0.045066				0.786049
2.625	0.164576				0.045487				0.785732
2.65	0.164378				0.045905				0.785424
2.675	0.164173				0.046319				0.785125
2.7	0.163963				0.046729				0.784835
2.725	0.163747				0.047137				0.784552
2.75	0.163525				0.047541				0.784278
2.775	0.163298				0.047941				0.784012
2.8	0.163067				0.048338				0.783753
2.825	0.16283				0.048732				0.783502
2.85	0.162589				0.049123				0.783257
2.875	0.162344				0.04951				0.78302
2.9	0.162095				0.049893				0.78279
2.925	0.161841				0.050274				0.782566
2.95	0.161585				0.050651				0.782348
2.975	0.161324				0.051024				0.782137
3	0.16106		0.120565	0.191706	0.051394		0.041262	0.062622	0.781932		0.831502	0.737469
3.025	0.160794				0.051761				0.781732
3.05	0.160524				0.052124				0.781538
3.075	0.160251				0.052484				0.78135
3.1	0.159976				0.052841				0.781167
3.125	0.159698				0.053194				0.780989
3.15	0.159418				0.053544				0.780817
3.175	0.159135				0.053891				0.780649
3.2	0.158851				0.054234				0.780486
3.225	0.158565				0.054574				0.780328
3.25	0.158277				0.05491				0.780174
3.275	0.157987				0.055243				0.780025
3.3	0.157695				0.055573				0.77988
3.325	0.157403				0.0559				0.779739
3.35	0.157108				0.056223				0.779602
3.375	0.156813				0.056543				0.779469
3.4	0.156517				0.05686				0.77934
3.425	0.156219				0.057174				0.779214
3.45	0.155921				0.057484				0.779092
3.475	0.155622				0.057791				0.778973
3.5	0.155322				0.058095				0.778858
3.525	0.155022				0.058396				0.778746
3.55	0.154721				0.058693				0.778638
3.575	0.154419				0.058987				0.778532
3.6	0.154117				0.059278				0.77843
3.625	0.153815				0.059566				0.77833
3.65	0.153513				0.059851				0.778233
3.675	0.153211				0.060133				0.778139
3.7	0.152908				0.060412				0.778048
3.725	0.152606				0.060687				0.777959
3.75	0.152303				0.06096				0.777873
3.775	0.152001				0.061229				0.777789
3.8	0.151699				0.061496				0.777708
3.825	0.151397				0.061759				0.777629
3.85	0.151095				0.06202				0.777552
3.875	0.150794				0.062277				0.777477
3.9	0.150493				0.062531				0.777405
3.925	0.150193				0.062783				0.777334
3.95	0.149893				0.063031				0.777266
3.975	0.149594				0.063277				0.7772
4	0.149295				0.06352				0.777135
4.025	0.148997				0.06376				0.777072
4.05	0.1487				0.063996				0.777011
4.075	0.148403				0.064231				0.776952
4.1	0.148107				0.064462				0.776895
4.125	0.147812				0.06469				0.776839
4.15	0.147518				0.064916				0.776785
4.175	0.147224				0.065139				0.776732
4.2	0.146932				0.065359				0.776681
4.225	0.14664				0.065576				0.776631
4.25	0.146349				0.065791				0.776582
4.275	0.14606				0.066003				0.776536
4.3	0.145771				0.066212				0.77649
4.325	0.145483				0.066419				0.776446
4.35	0.145197				0.066623				0.776402
4.375	0.144911				0.066824				0.776361
4.4	0.144627				0.067022				0.77632
4.425	0.144344				0.067218				0.776281
4.45	0.144062				0.067412				0.776242
4.475	0.143781				0.067603				0.776205
4.5	0.143501				0.067791				0.776169
4.525	0.143223				0.067977				0.776134
4.55	0.142945				0.06816				0.776099
4.575	0.142669				0.068341				0.776066
4.6	0.142394				0.068519				0.776034
4.625	0.142121				0.068695				0.776003
4.65	0.141849				0.068869				0.775972
4.675	0.141578				0.069039				0.775943
4.7	0.141308				0.069208				0.775914
4.725	0.14104				0.069374				0.775886
4.75	0.140773				0.069538				0.775859
4.775	0.140507				0.0697				0.775833
4.8	0.140243				0.069859				0.775807
4.825	0.13998				0.070015				0.775782
4.85	0.139718				0.07017				0.775758
4.875	0.139458				0.070322				0.775735
4.9	0.139199				0.070472				0.775712
4.925	0.138941				0.07062				0.77569
4.95	0.138685				0.070765				0.775668
4.975	0.138431				0.070909				0.775647
5	0.138177		0.103734	0.173222	0.07105		0.057696	0.082074	0.775627		0.820742	0.727953
5.025	0.137925				0.071189				0.775607
5.05	0.137675				0.071325				0.775588
5.075	0.137426				0.07146				0.775569
5.1	0.137178				0.071592				0.775551
5.125	0.136932				0.071723				0.775534
5.15	0.136687				0.071851				0.775517
5.175	0.136444				0.071977				0.7755
5.2	0.136202				0.072101				0.775484
5.225	0.135961				0.072223				0.775468
5.25	0.135722				0.072343				0.775453
5.275	0.135484				0.072461				0.775438
5.3	0.135248				0.072577				0.775424
5.325	0.135013				0.072691				0.77541
5.35	0.13478				0.072803				0.775397
5.375	0.134548				0.072914				0.775383
5.4	0.134317				0.073022				0.775371
5.425	0.134088				0.073128				0.775358
5.45	0.13386				0.073232				0.775346
5.475	0.133634				0.073335				0.775334
5.5	0.133409				0.073436				0.775323
5.525	0.133185				0.073534				0.775312
5.55	0.132963				0.073631				0.775301
5.575	0.132743				0.073726				0.775291
5.6	0.132523				0.07382				0.775281
5.625	0.132305				0.073911				0.775271
5.65	0.132089				0.074001				0.775261
5.675	0.131874				0.074089				0.775252
5.7	0.13166				0.074175				0.775243
5.725	0.131448				0.07426				0.775234
5.75	0.131237				0.074343				0.775226
5.775	0.131027				0.074424				0.775217
5.8	0.130819				0.074503				0.775209
5.825	0.130612				0.074581				0.775201
5.85	0.130407				0.074657				0.775194
5.875	0.130203				0.074732				0.775187
5.9	0.13				0.074804				0.775179
5.925	0.129799				0.074876				0.775172
5.95	0.129599				0.074945				0.775166
5.975	0.1294				0.075013				0.775159
6	0.129203				0.07508				0.775153
6.025	0.129007				0.075145				0.775146
6.05	0.128812				0.075208				0.77514
6.075	0.128618				0.07527				0.775135
6.1	0.128426				0.07533				0.775129
6.125	0.128236				0.075389				0.775123
6.15	0.128046				0.075446				0.775118
6.175	0.127858				0.075502				0.775113
6.2	0.127671				0.075556				0.775108
6.225	0.127486				0.075609				0.775103
6.25	0.127301				0.075661				0.775098
6.275	0.127118				0.075711				0.775093
6.3	0.126936				0.07576				0.775089
6.325	0.126756				0.075807				0.775085
6.35	0.126577				0.075853				0.77508
6.375	0.126399				0.075897				0.775076
6.4	0.126222				0.07594				0.775072
6.425	0.126046				0.075982				0.775068
6.45	0.125872				0.076023				0.775064
6.475	0.125699				0.076062				0.775061
6.5	0.125527				0.0761				0.775057
6.525	0.125356				0.076136				0.775054
6.55	0.125187				0.076171				0.77505
6.575	0.125018				0.076205				0.775047
6.6	0.124851				0.076238				0.775044
6.625	0.124685				0.07627				0.775041
6.65	0.124521				0.0763				0.775038
6.675	0.124357				0.076329				0.775035
6.7	0.124195				0.076357				0.775032
6.725	0.124033				0.076383				0.775029
6.75	0.123873				0.076409				0.775027
6.775	0.123714				0.076433				0.775024
6.8	0.123556				0.076456				0.775021
6.825	0.1234				0.076478				0.775019
6.85	0.123244				0.076499				0.775017
6.875	0.12309				0.076518				0.775014
6.9	0.122936				0.076537				0.775012
6.925	0.122784				0.076554				0.77501
6.95	0.122633				0.07657				0.775008
6.975	0.122483				0.076585				0.775006
7	0.122334				0.076599				0.775004
7.025	0.122186				0.076612				0.775002
7.05	0.122039				0.076624				0.775
7.075	0.121893				0.076635				0.774998
7.1	0.121749				0.076645				0.774996
7.125	0.121605				0.076654				0.774994
7.15	0.121462				0.076662				0.774993
7.175	0.121321				0.076668				0.774991
7.2	0.12118				0.076674				0.774989
7.225	0.12104				0.076679				0.774988
7.25	0.120902				0.076683				0.774986
7.275	0.120764				0.076686				0.774985
7.3	0.120628				0.076687				0.774984
7.325	0.120492				0.076688				0.774982
7.35	0.120358				0.076688				0.774981
7.375	0.120224				0.076687				0.774979
7.4	0.120091				0.076685				0.774978
7.425	0.11996				0.076683				0.774977
7.45	0.119829				0.076679				0.774976
7.475	0.119699				0.076674				0.774975
7.5	0.119571		0.087057	0.155846	0.076669		0.068375	0.085702	0.774974		0.808118	0.73641
7.525	0.119443				0.076662				0.774972
7.55	0.119316				0.076655				0.774971
7.575	0.11919				0.076647				0.77497
7.6	0.119065				0.076638				0.774969
7.625	0.118941				0.076628				0.774968
7.65	0.118818				0.076618				0.774967
7.675	0.118695				0.076606				0.774966
7.7	0.118574				0.076594				0.774966
7.725	0.118453				0.076581				0.774965
7.75	0.118334				0.076567				0.774964
7.775	0.118215				0.076552				0.774963
7.8	0.118097				0.076537				0.774962
7.825	0.11798				0.076521				0.774962
7.85	0.117864				0.076504				0.774961
7.875	0.117749				0.076486				0.77496
7.9	0.117634				0.076467				0.774959
7.925	0.117521				0.076448				0.774959
7.95	0.117408				0.076428				0.774958
7.975	0.117296				0.076407				0.774957
8	0.117185				0.076386				0.774957
8.025	0.117075				0.076364				0.774956
8.05	0.116965				0.076341				0.774955
8.075	0.116857				0.076317				0.774955
8.1	0.116749				0.076293				0.774954
8.125	0.116642				0.076268				0.774954
8.15	0.116536				0.076242				0.774953
8.175	0.11643				0.076216				0.774953
8.2	0.116326				0.076189				0.774952
8.225	0.116222				0.076161				0.774952
8.25	0.116119				0.076133				0.774951
8.275	0.116016				0.076104				0.774951
8.3	0.115915				0.076075				0.77495
8.325	0.115814				0.076044				0.77495
8.35	0.115714				0.076014				0.77495
8.375	0.115615				0.075982				0.774949
8.4	0.115516				0.07595				0.774949
8.425	0.115418				0.075918				0.774948
8.45	0.115321				0.075884				0.774948
8.475	0.115225				0.075851				0.774948
8.5	0.115129				0.075816				0.774947
8.525	0.115034				0.075781				0.774947
8.55	0.11494				0.075746				0.774947
8.575	0.114846				0.07571				0.774946
8.6	0.114753				0.075673				0.774946
8.625	0.114661				0.075636				0.774946
8.65	0.11457				0.075598				0.774945
8.675	0.114479				0.07556				0.774945
8.7	0.114389				0.075521				0.774945
8.725	0.114299				0.075482				0.774944
8.75	0.114211				0.075442				0.774944
8.775	0.114122				0.075402				0.774944
8.8	0.114035				0.075361				0.774944
8.825	0.113948				0.07532				0.774943
8.85	0.113862				0.075278				0.774943
8.875	0.113777				0.075236				0.774943
8.9	0.113692				0.075193				0.774943
8.925	0.113607				0.07515				0.774943
8.95	0.113524				0.075106				0.774942
8.975	0.113441				0.075062				0.774942
9	0.113359				0.075017				0.774942
9.025	0.113277				0.074972				0.774942
9.05	0.113196				0.074927				0.774942
9.075	0.113115				0.074881				0.774941
9.1	0.113035				0.074834				0.774941
9.125	0.112956				0.074787				0.774941
9.15	0.112877				0.07474				0.774941
9.175	0.112799				0.074692				0.774941
9.2	0.112722				0.074644				0.774941
9.225	0.112645				0.074596				0.77494
9.25	0.112568				0.074547				0.77494
9.275	0.112492				0.074497				0.77494
9.3	0.112417				0.074448				0.77494
9.325	0.112342				0.074398				0.77494
9.35	0.112268				0.074347				0.77494
9.375	0.112195				0.074296				0.77494
9.4	0.112122				0.074245				0.774939
9.425	0.112049				0.074193				0.774939
9.45	0.111977				0.074141				0.774939
9.475	0.111906				0.074089				0.774939
9.5	0.111835				0.074036				0.774939
9.525	0.111765				0.073983				0.774939
9.55	0.111695				0.07393				0.774939
9.575	0.111626				0.073876				0.774939
9.6	0.111557				0.073822				0.774939
9.625	0.111489				0.073768				0.774938
9.65	0.111421				0.073713				0.774938
9.675	0.111354				0.073658				0.774938
9.7	0.111287				0.073602				0.774938
9.725	0.111223				0.073545				0.774938
9.75	0.111159				0.073488				0.774938
9.775	0.111096				0.073431				0.774938
9.8	0.111032				0.073373				0.774938
9.825	0.110969				0.073316				0.774938
9.85	0.110905				0.073258				0.774938
9.875	0.110842				0.073201				0.774938
9.9	0.110779				0.073144				0.774938
9.925	0.110715				0.073086				0.774938
9.95	0.110652				0.073029				0.774937
9.975	0.110588				0.072971				0.774937
10	0.110525		0.078318	0.141399	0.072914		0.066008	0.079495	0.774937		0.807867	0.756489

## Sheet: Fig. 2 - supp1a
time	S0 curve		S0-1 data	S0-2 data	S1 curve		S1-1 data	S1-2 data	S2 curve		S2-1 data	S2-2 data
0	1				0				0
0.025	0.997392				0.002603				4.23e-06
0.05	0.994819		0.993383	0.996654	0.005164		0.006577	0.002597	1.68e-05		0	0.000691
0.075	0.992279				0.007683				3.76e-05
0.1	0.989773		0.987237	0.994483	0.01016		0.01125	0.004673	6.63e-05		0.000918	0.000442
0.125	0.9873				0.012596				0.000103
0.15	0.98486				0.014992				0.000147
0.175	0.982451				0.017349				0.000199
0.2	0.980075		0.973008	0.986881	0.019666		0.023647	0.012808	0.000258		0.001593	0.001141
0.225	0.977729				0.021944				0.000324
0.25	0.975415				0.024185				0.000397
0.275	0.973131				0.026388				0.000476
0.3	0.970877		0.962761	0.974918	0.028554		0.031667	0.0253	0.000563		0.003153	0.000712
0.325	0.968652				0.030683				0.000656
0.35	0.966457				0.032777				0.000755
0.375	0.964291				0.034835				0.000861
0.4	0.962153				0.036859				0.000972
0.425	0.960044				0.038848				0.001089
0.45	0.957962				0.040803				0.001213
0.475	0.955908				0.042725				0.001341
0.5	0.95388		0.948821	0.957698	0.044614		0.049542	0.042068	0.001476		0.001122	0.001443
0.525	0.95188				0.046471				0.001615
0.55	0.949905				0.048295				0.00176
0.575	0.947957				0.050088				0.00191
0.6	0.946035				0.051851				0.002065
0.625	0.944137				0.053582				0.002225
0.65	0.942265				0.055283				0.002389
0.675	0.940417				0.056955				0.002558
0.7	0.938594		0.934731	0.944822	0.058598		0.060604	0.055515	0.002731		0.005231	0.000852
0.725	0.936794				0.060211				0.002909
0.75	0.935018				0.061796				0.003091
0.775	0.933266				0.063354				0.003277
0.8	0.931537				0.064883				0.003467
0.825	0.92983				0.066386				0.003661
0.85	0.928146				0.067861				0.003859
0.875	0.926484				0.06931				0.004061
0.9	0.924844				0.070734				0.004266
0.925	0.923226				0.072131				0.004474
0.95	0.921629				0.073504				0.004686
0.975	0.920053				0.074851				0.004902
1	0.918497		0.918562	0.931625	0.076174		0.075213	0.066136	0.00512		0.006225	0.003133
1.025	0.916962				0.077473				0.005342
1.05	0.915448				0.078748				0.005566
1.075	0.913953				0.08				0.005794
1.1	0.912478				0.081228				0.006024
1.125	0.911022				0.082434				0.006257
1.15	0.909586				0.083617				0.006492
1.175	0.908168				0.084778				0.00673
1.2	0.906769		0.886934	0.910376	0.085918		0.103805	0.083793	0.006971		0.008769	0.007097
1.225	0.905389				0.087036				0.007214
1.25	0.904026				0.088133				0.007459
1.275	0.902682				0.089209				0.007707
1.3	0.901355				0.090265				0.007957
1.325	0.900046				0.0913				0.008208
1.35	0.898754				0.092316				0.008462
1.375	0.897479				0.093312				0.008718
1.4	0.896221				0.094289				0.008976
1.425	0.894979				0.095247				0.009235
1.45	0.893753				0.096186				0.009496
1.475	0.892544				0.097106				0.009759
1.5	0.891351		0.872819	0.90042	0.098009		0.116537	0.089493	0.010023		0.010008	0.00902
1.525	0.890173				0.098893				0.010289
1.55	0.889011				0.09976				0.010556
1.575	0.887865				0.10061				0.010825
1.6	0.886733				0.101442				0.011095
1.625	0.885616				0.102258				0.011366
1.65	0.884514				0.103057				0.011639
1.675	0.883426				0.10384				0.011912
1.7	0.882353				0.104607				0.012187
1.725	0.881294				0.105358				0.012463
1.75	0.880249				0.106093				0.01274
1.775	0.879217				0.106813				0.013018
1.8	0.878199				0.107518				0.013296
1.825	0.877195				0.108208				0.013576
1.85	0.876204				0.108883				0.013856
1.875	0.875226				0.109544				0.014137
1.9	0.87426				0.110191				0.014418
1.925	0.873308				0.110824				0.014701
1.95	0.872367				0.111443				0.014983
1.975	0.87144				0.112048				0.015267
2	0.870524		0.846696	0.888645	0.11264		0.131473	0.100448	0.015551		0.018821	0.011311
2.025	0.869621				0.113219				0.015835
2.05	0.868729				0.113785				0.01612
2.075	0.867849				0.114338				0.016405
2.1	0.866981				0.114879				0.01669
2.125	0.866124				0.115407				0.016976
2.15	0.865279				0.115924				0.017262
2.175	0.864444				0.116428				0.017548
2.2	0.863621				0.11692				0.017834
2.225	0.862808				0.117401				0.018121
2.25	0.862007				0.117871				0.018407
2.275	0.861215				0.118329				0.018694
2.3	0.860434				0.118776				0.01898
2.325	0.859664				0.119212				0.019267
2.35	0.858903				0.119638				0.019553
2.375	0.858153				0.120053				0.01984
2.4	0.857412				0.120458				0.020126
2.425	0.856681				0.120852				0.020412
2.45	0.85596				0.121237				0.020699
2.475	0.855248				0.121611				0.020984
2.5	0.854546				0.121976				0.02127
2.525	0.853853				0.122331				0.021555
2.55	0.853169				0.122677				0.021841
2.575	0.852494				0.123014				0.022125
2.6	0.851828				0.123341				0.02241
2.625	0.85117				0.123659				0.022694
2.65	0.850522				0.123969				0.022977
2.675	0.849881				0.12427				0.023261
2.7	0.84925				0.124562				0.023544
2.725	0.848626				0.124846				0.023826
2.75	0.848011				0.125122				0.024108
2.775	0.847404				0.12539				0.024389
2.8	0.846805				0.125649				0.02467
2.825	0.846214				0.125901				0.02495
2.85	0.84563				0.126145				0.02523
2.875	0.845054				0.126382				0.025509
2.9	0.844486				0.126611				0.025788
2.925	0.843925				0.126832				0.026066
2.95	0.843372				0.127046				0.026343
2.975	0.842826				0.127254				0.02662
3	0.842287		0.828696	0.864647	0.127454		0.137366	0.10956	0.026895		0.030173	0.023779
3.025	0.841755				0.127647				0.027171
3.05	0.841231				0.127834				0.027445
3.075	0.840713				0.128014				0.027719
3.1	0.840202				0.128187				0.027992
3.125	0.839697				0.128354				0.028264
3.15	0.8392				0.128514				0.028536
3.175	0.838709				0.128669				0.028806
3.2	0.838224				0.128817				0.029076
3.225	0.837746				0.128959				0.029345
3.25	0.837274				0.129095				0.029613
3.275	0.836808				0.129226				0.02988
3.3	0.836348				0.129351				0.030147
3.325	0.835895				0.12947				0.030412
3.35	0.835447				0.129584				0.030677
3.375	0.835005				0.129692				0.030941
3.4	0.834569				0.129795				0.031204
3.425	0.834139				0.129892				0.031466
3.45	0.833715				0.129985				0.031727
3.475	0.833296				0.130073				0.031987
3.5	0.832882				0.130155				0.032246
3.525	0.832474				0.130233				0.032504
3.55	0.832072				0.130306				0.032761
3.575	0.831674				0.130374				0.033017
3.6	0.831282				0.130437				0.033273
3.625	0.830895				0.130496				0.033527
3.65	0.830513				0.130551				0.03378
3.675	0.830137				0.130601				0.034032
3.7	0.829765				0.130647				0.034283
3.725	0.829398				0.130689				0.034533
3.75	0.829036				0.130726				0.034782
3.775	0.828678				0.13076				0.03503
3.8	0.828326				0.130789				0.035277
3.825	0.827978				0.130815				0.035523
3.85	0.827634				0.130836				0.035768
3.875	0.827295				0.130854				0.036012
3.9	0.826961				0.130868				0.036255
3.925	0.826631				0.130879				0.036496
3.95	0.826305				0.130886				0.036737
3.975	0.825984				0.130889				0.036977
4	0.825667				0.130889				0.037215
4.025	0.825354				0.130886				0.037452
4.05	0.825045				0.130879				0.037688
4.075	0.82474				0.130869				0.037923
4.1	0.824439				0.130856				0.038157
4.125	0.824142				0.13084				0.03839
4.15	0.823849				0.13082				0.038622
4.175	0.82356				0.130798				0.038853
4.2	0.823275				0.130773				0.039082
4.225	0.822993				0.130745				0.039311
4.25	0.822716				0.130714				0.039538
4.275	0.822441				0.13068				0.039764
4.3	0.822171				0.130643				0.039989
4.325	0.821904				0.130604				0.040213
4.35	0.82164				0.130562				0.040436
4.375	0.82138				0.130518				0.040657
4.4	0.821124				0.130471				0.040878
4.425	0.820871				0.130422				0.041097
4.45	0.820621				0.13037				0.041315
4.475	0.820374				0.130316				0.041532
4.5	0.820131				0.130259				0.041748
4.525	0.819891				0.130201				0.041963
4.55	0.819654				0.13014				0.042177
4.575	0.81942				0.130077				0.042389
4.6	0.819189				0.130011				0.0426
4.625	0.818961				0.129944				0.042811
4.65	0.818737				0.129875				0.04302
4.675	0.818515				0.129803				0.043228
4.7	0.818296				0.12973				0.043434
4.725	0.81808				0.129655				0.04364
4.75	0.817867				0.129578				0.043845
4.775	0.817656				0.129499				0.044048
4.8	0.817449				0.129418				0.04425
4.825	0.817244				0.129336				0.044451
4.85	0.817042				0.129252				0.044651
4.875	0.816842				0.129166				0.04485
4.9	0.816646				0.129078				0.045048
4.925	0.816451				0.128989				0.045244
4.95	0.81626				0.128899				0.04544
4.975	0.81607				0.128807				0.045634
5	0.815884		0.788473	0.846248	0.128713		0.143781	0.109185	0.045827		0.056197	0.036941
5.025	0.815699				0.128618				0.046019
5.05	0.815518				0.128521				0.04621
5.075	0.815338				0.128423				0.0464
5.1	0.815161				0.128324				0.046589
5.125	0.814986				0.128224				0.046776
5.15	0.814814				0.128122				0.046963
5.175	0.814644				0.128019				0.047148
5.2	0.814476				0.127915				0.047332
5.225	0.81431				0.127809				0.047515
5.25	0.814147				0.127702				0.047697
5.275	0.813985				0.127595				0.047878
5.3	0.813826				0.127486				0.048058
5.325	0.813669				0.127376				0.048237
5.35	0.813514				0.127265				0.048414
5.375	0.813361				0.127153				0.048591
5.4	0.81321				0.12704				0.048766
5.425	0.813061				0.126926				0.04894
5.45	0.812914				0.126811				0.049114
5.475	0.812769				0.126695				0.049286
5.5	0.812625				0.126579				0.049457
5.525	0.812484				0.126461				0.049627
5.55	0.812344				0.126343				0.049796
5.575	0.812207				0.126224				0.049964
5.6	0.812071				0.126104				0.050131
5.625	0.811937				0.125983				0.050296
5.65	0.811805				0.125861				0.050461
5.675	0.811674				0.125739				0.050625
5.7	0.811545				0.125616				0.050787
5.725	0.811418				0.125493				0.050949
5.75	0.811293				0.125369				0.051109
5.775	0.811169				0.125244				0.051269
5.8	0.811047				0.125119				0.051427
5.825	0.810926				0.124993				0.051585
5.85	0.810807				0.124866				0.051741
5.875	0.81069				0.124739				0.051896
5.9	0.810574				0.124611				0.052051
5.925	0.81046				0.124483				0.052204
5.95	0.810347				0.124355				0.052356
5.975	0.810235				0.124226				0.052508
6	0.810125				0.124096				0.052658
6.025	0.810017				0.123966				0.052807
6.05	0.80991				0.123836				0.052955
6.075	0.809804				0.123705				0.053103
6.1	0.8097				0.123574				0.053249
6.125	0.809597				0.123443				0.053394
6.15	0.809496				0.123311				0.053539
6.175	0.809396				0.123179				0.053682
6.2	0.809297				0.123046				0.053824
6.225	0.809199				0.122914				0.053966
6.25	0.809103				0.122781				0.054106
6.275	0.809008				0.122647				0.054246
6.3	0.808914				0.122514				0.054384
6.325	0.808822				0.12238				0.054522
6.35	0.808731				0.122246				0.054659
6.375	0.80864				0.122112				0.054794
6.4	0.808552				0.121978				0.054929
6.425	0.808464				0.121843				0.055063
6.45	0.808377				0.121708				0.055196
6.475	0.808292				0.121574				0.055328
6.5	0.808208				0.121439				0.055459
6.525	0.808124				0.121304				0.055589
6.55	0.808042				0.121168				0.055718
6.575	0.807961				0.121033				0.055847
6.6	0.807881				0.120898				0.055974
6.625	0.807802				0.120762				0.056101
6.65	0.807725				0.120627				0.056226
6.675	0.807648				0.120491				0.056351
6.7	0.807572				0.120355				0.056475
6.725	0.807497				0.12022				0.056598
6.75	0.807423				0.120084				0.05672
6.775	0.80735				0.119948				0.056841
6.8	0.807278				0.119813				0.056962
6.825	0.807207				0.119677				0.057081
6.85	0.807137				0.119541				0.0572
6.875	0.807068				0.119406				0.057318
6.9	0.807				0.11927				0.057435
6.925	0.806933				0.119135				0.057551
6.95	0.806866				0.118999				0.057666
6.975	0.806801				0.118864				0.05778
7	0.806736				0.118728				0.057894
7.025	0.806672				0.118593				0.058007
7.05	0.806609				0.118458				0.058119
7.075	0.806547				0.118323				0.05823
7.1	0.806486				0.118188				0.05834
7.125	0.806425				0.118053				0.05845
7.15	0.806366				0.117919				0.058559
7.175	0.806307				0.117784				0.058667
7.2	0.806248				0.11765				0.058774
7.225	0.806191				0.117516				0.05888
7.25	0.806134				0.117381				0.058986
7.275	0.806078				0.117248				0.059091
7.3	0.806023				0.117114				0.059195
7.325	0.805969				0.11698				0.059298
7.35	0.805915				0.116847				0.0594
7.375	0.805862				0.116714				0.059502
7.4	0.80581				0.116581				0.059603
7.425	0.805758				0.116448				0.059703
7.45	0.805707				0.116315				0.059803
7.475	0.805657				0.116183				0.059901
7.5	0.805607		0.778819	0.831953	0.116051		0.130673	0.102784	0.059999		0.067557	0.049085
7.525	0.805558				0.115919				0.060097
7.55	0.80551				0.115787				0.060193
7.575	0.805462				0.115656				0.060289
7.6	0.805415				0.115525				0.060384
7.625	0.805369				0.115394				0.060478
7.65	0.805323				0.115263				0.060572
7.675	0.805278				0.115133				0.060665
7.7	0.805233				0.115003				0.060757
7.725	0.805189				0.114873				0.060849
7.75	0.805146				0.114743				0.060939
7.775	0.805103				0.114614				0.06103
7.8	0.80506				0.114485				0.061119
7.825	0.805019				0.114356				0.061208
7.85	0.804977				0.114228				0.061296
7.875	0.804937				0.114099				0.061383
7.9	0.804896				0.113972				0.06147
7.925	0.804857				0.113844				0.061556
7.95	0.804818				0.113717				0.061641
7.975	0.804779				0.11359				0.061726
8	0.804741				0.113463				0.06181
8.025	0.804704				0.113337				0.061894
8.05	0.804666				0.113211				0.061976
8.075	0.80463				0.113085				0.062059
8.1	0.804594				0.11296				0.06214
8.125	0.804558				0.112835				0.062221
8.15	0.804523				0.11271				0.062301
8.175	0.804488				0.112586				0.062381
8.2	0.804454				0.112462				0.06246
8.225	0.80442				0.112339				0.062538
8.25	0.804387				0.112215				0.062616
8.275	0.804354				0.112092				0.062693
8.3	0.804322				0.11197				0.06277
8.325	0.804289				0.111848				0.062846
8.35	0.804258				0.111726				0.062921
8.375	0.804227				0.111604				0.062996
8.4	0.804196				0.111483				0.06307
8.425	0.804165				0.111363				0.063144
8.45	0.804135				0.111242				0.063217
8.475	0.804106				0.111122				0.063289
8.5	0.804077				0.111003				0.063361
8.525	0.804048				0.110883				0.063432
8.55	0.804019				0.110764				0.063503
8.575	0.803991				0.110646				0.063573
8.6	0.803964				0.110528				0.063643
8.625	0.803936				0.11041				0.063712
8.65	0.803909				0.110293				0.06378
8.675	0.803883				0.110176				0.063848
8.7	0.803856				0.110059				0.063915
8.725	0.80383				0.109943				0.063982
8.75	0.803805				0.109827				0.064049
8.775	0.80378				0.109712				0.064114
8.8	0.803755				0.109597				0.06418
8.825	0.80373				0.109482				0.064244
8.85	0.803706				0.109368				0.064309
8.875	0.803682				0.109254				0.064372
8.9	0.803658				0.109141				0.064435
8.925	0.803635				0.109028				0.064498
8.95	0.803612				0.108915				0.06456
8.975	0.803589				0.108803				0.064622
9	0.803567				0.108691				0.064683
9.025	0.803545				0.108579				0.064744
9.05	0.803523				0.108468				0.064804
9.075	0.803501				0.108358				0.064864
9.1	0.80348				0.108248				0.064923
9.125	0.803459				0.108138				0.064981
9.15	0.803438				0.108028				0.06504
9.175	0.803418				0.107919				0.065097
9.2	0.803398				0.107811				0.065155
9.225	0.803378				0.107703				0.065211
9.25	0.803358				0.107595				0.065268
9.275	0.803339				0.107488				0.065324
9.3	0.80332				0.107381				0.065379
9.325	0.803301				0.107274				0.065434
9.35	0.803282				0.107168				0.065489
9.375	0.803264				0.107062				0.065543
9.4	0.803246				0.106957				0.065596
9.425	0.803228				0.106852				0.065649
9.45	0.80321				0.106747				0.065702
9.475	0.803193				0.106643				0.065754
9.5	0.803176				0.10654				0.065806
9.525	0.803159				0.106436				0.065858
9.55	0.803142				0.106334				0.065909
9.575	0.803126				0.106231				0.065959
9.6	0.803109				0.106129				0.066009
9.625	0.803093				0.106028				0.066059
9.65	0.803077				0.105926				0.066108
9.675	0.803062				0.105826				0.066157
9.7	0.803046				0.105725				0.066206
9.725	0.803031				0.105625				0.066254
9.75	0.803016				0.105526				0.066302
9.775	0.803001				0.105426				0.066349
9.8	0.802986				0.105328				0.066396
9.825	0.802972				0.105229				0.066442
9.85	0.802958				0.105131				0.066488
9.875	0.802944				0.105035				0.066533
9.9	0.80293				0.104938				0.066578
9.925	0.802917				0.104842				0.066623
9.95	0.802903				0.104745				0.066667
9.975	0.802889				0.104649				0.066712
10	0.802876		0.776576	0.823129	0.104553		0.116467	0.093176	0.066757		0.076883	0.055983

## Sheet: Fig. 2 - supp1b
time	S1 curve		S1-1 data	S1-2 data					S0 curve		S0-1 data	S0-2 data
0	0								1
0.025	0.002726								0.997262
0.05	0.005382		0.020648	0.010078					0.994571		0.977939	0.988738
0.075	0.007969								0.991926
0.1	0.010488		0.034421	0.018583					0.989328		0.962572	0.979894
0.125	0.012942								0.986775
0.15	0.015332								0.984266
0.175	0.017661								0.9818
0.2	0.019929		0.050962	0.029993					0.979377		0.944266	0.963656
0.225	0.022138								0.976997
0.25	0.02429								0.974657
0.275	0.026387								0.972358
0.3	0.028429		0.058044	0.042854					0.970099		0.937401	0.948319
0.325	0.030418								0.96788
0.35	0.032356								0.965698
0.375	0.034244								0.963555
0.4	0.036084								0.961449
0.425	0.037876								0.959379
0.45	0.039621								0.957345
0.475	0.041322								0.955347
0.5	0.042979		0.074054	0.051381					0.953383		0.919901	0.936512
0.525	0.044593								0.951453
0.55	0.046166								0.949557
0.575	0.047699								0.947693
0.6	0.049192								0.945862
0.625	0.050646								0.944063
0.65	0.052064								0.942295
0.675	0.053445								0.940558
0.7	0.054791								0.93885
0.725	0.056102								0.937173
0.75	0.05738		0.079302	0.065823					0.935524		0.915358	0.929022
0.775	0.058625								0.933904
0.8	0.059838								0.932312
0.825	0.06102								0.930748
0.85	0.062172								0.929211
0.875	0.063295								0.927701
0.9	0.064389								0.926216
0.925	0.065455								0.924758
0.95	0.066494								0.923325
0.975	0.067506								0.921916
1	0.068493		0.079387	0.078421					0.920532		0.915837	0.915985
1.025	0.069455								0.919173
1.05	0.070392								0.917836
1.075	0.071306								0.916523
1.1	0.072196								0.915233
1.125	0.073064								0.913965
1.15	0.07391								0.912719
1.175	0.074734								0.911495
1.2	0.075538		0.07762	0.078318					0.910291		0.917515	0.915362
1.225	0.076321								0.909109
1.25	0.077084								0.907948
1.275	0.077829								0.906806
1.3	0.078554								0.905684
1.325	0.079261								0.904582
1.35	0.079951								0.903499
1.375	0.080623								0.902434
1.4	0.081278								0.901388
1.425	0.081917								0.900361
1.45	0.082539								0.899351
1.475	0.083146								0.898358
1.5	0.083738		0.080504	0.073936					0.897383		0.913843	0.905723
1.525	0.084315								0.896425
1.55	0.084878								0.895483
1.575	0.085426								0.894558
1.6	0.085961								0.893648
1.625	0.086482								0.892755
1.65	0.086991								0.891877
1.675	0.087486								0.891014
1.7	0.08797								0.890166
1.725	0.088441								0.889333
1.75	0.088901								0.888515
1.775	0.089349								0.88771
1.8	0.089786								0.88692
1.825	0.090212								0.886143
1.85	0.090628								0.88538
1.875	0.091033								0.88463
1.9	0.091428								0.883892
1.925	0.091814								0.883168
1.95	0.09219								0.882457
1.975	0.092557								0.881757
2	0.092914		0.06323	0.085571					0.88107		0.932143	0.88876
2.025	0.093263								0.880395
2.05	0.093603								0.879731
2.075	0.093935								0.879079
2.1	0.094259								0.878438
2.125	0.094575								0.877809
2.15	0.094883								0.87719
2.175	0.095183								0.876582
2.2	0.095476								0.875984
2.225	0.095762								0.875397
2.25	0.096041								0.87482
2.275	0.096314								0.874254
2.3	0.096579								0.873697
2.325	0.096838								0.873149
2.35	0.097091								0.872611
2.375	0.097337								0.872083
2.4	0.097578								0.871563
2.425	0.097813								0.871053
2.45	0.098042								0.870551
2.475	0.098265								0.870059
2.5	0.098483								0.869574
2.525	0.098696								0.869098
2.55	0.098904								0.868631
2.575	0.099106								0.868171
2.6	0.099304								0.86772
2.625	0.099497								0.867276
2.65	0.099685								0.86684
2.675	0.099869								0.866412
2.7	0.100048								0.865991
2.725	0.100223								0.865577
2.75	0.100394								0.86517
2.775	0.100561								0.864771
2.8	0.100723								0.864378
2.825	0.100882								0.863993
2.85	0.101037								0.863614
2.875	0.101189								0.863241
2.9	0.101336								0.862875
2.925	0.101481								0.862515
2.95	0.101621								0.862162
2.975	0.101759								0.861815
3	0.101893		0.085733	0.117109					0.861473		0.903883	0.842838
3.025	0.102024								0.861138
3.05	0.102152								0.860809
3.075	0.102277								0.860485
3.1	0.102399								0.860167
3.125	0.102518								0.859854
3.15	0.102634								0.859547
3.175	0.102747								0.859245
3.2	0.102858								0.858948
3.225	0.102966								0.858657
3.25	0.103072								0.85837
3.275	0.103175								0.858089
3.3	0.103276								0.857812
3.325	0.103374								0.85754
3.35	0.10347								0.857273
3.375	0.103564								0.857011
3.4	0.103656								0.856753
3.425	0.103745								0.856499
3.45	0.103833								0.85625
3.475	0.103918								0.856005
3.5	0.104002								0.855765
3.525	0.104083								0.855529
3.55	0.104163								0.855296
3.575	0.10424								0.855068
3.6	0.104316								0.854844
3.625	0.10439								0.854624
3.65	0.104463								0.854407
3.675	0.104534								0.854194
3.7	0.104603								0.853985
3.725	0.10467								0.85378
3.75	0.104736								0.853578
3.775	0.104801								0.85338
3.8	0.104864								0.853185
3.825	0.104925								0.852993
3.85	0.104985								0.852805
3.875	0.105044								0.85262
3.9	0.105102								0.852438
3.925	0.105158								0.85226
3.95	0.105213								0.852084
3.975	0.105266								0.851912
4	0.105318								0.851742
4.025	0.10537								0.851576
4.05	0.10542								0.851412
4.075	0.105469								0.851251
4.1	0.105516								0.851093
4.125	0.105563								0.850938
4.15	0.105609								0.850785
4.175	0.105653								0.850635
4.2	0.105697								0.850488
4.225	0.105739								0.850343
4.25	0.105781								0.850201
4.275	0.105822								0.850061
4.3	0.105862								0.849924
4.325	0.105901								0.849789
4.35	0.105939								0.849656
4.375	0.105976								0.849526
4.4	0.106012								0.849398
4.425	0.106048								0.849272
4.45	0.106083								0.849148
4.475	0.106117								0.849027
4.5	0.10615								0.848907
4.525	0.106182								0.84879
4.55	0.106214								0.848675
4.575	0.106245								0.848561
4.6	0.106276								0.84845
4.625	0.106305								0.848341
4.65	0.106334								0.848233
4.675	0.106363								0.848127
4.7	0.106391								0.848024
4.725	0.106418								0.847922
4.75	0.106444								0.847821
4.775	0.10647								0.847723
4.8	0.106496								0.847626
4.825	0.106521								0.847531
4.85	0.106545								0.847437
4.875	0.106569								0.847346
4.9	0.106592								0.847255
4.925	0.106615								0.847167
4.95	0.106637								0.84708
4.975	0.106659								0.846994
5	0.10668		0.1144	0.116661					0.84691		0.865783	0.813581
5.025	0.106701								0.846827
5.05	0.106722								0.846746
5.075	0.106741								0.846666
5.1	0.106761								0.846587
5.125	0.10678								0.84651
5.15	0.106799								0.846435
5.175	0.106817								0.84636
5.2	0.106835								0.846287
5.225	0.106853								0.846215
5.25	0.10687								0.846144
5.275	0.106886								0.846075
5.3	0.106903								0.846007
5.325	0.106919								0.84594
5.35	0.106935								0.845874
5.375	0.10695								0.845809
5.4	0.106965								0.845746
5.425	0.10698								0.845683
5.45	0.106994								0.845622
5.475	0.107008								0.845561
5.5	0.107022								0.845502
5.525	0.107036								0.845444
5.55	0.107049								0.845386
5.575	0.107062								0.84533
5.6	0.107075								0.845275
5.625	0.107087								0.845221
5.65	0.107099								0.845167
5.675	0.107111								0.845115
5.7	0.107123								0.845063
5.725	0.107134								0.845013
5.75	0.107145								0.844963
5.775	0.107156								0.844914
5.8	0.107167								0.844866
5.825	0.107178								0.844819
5.85	0.107188								0.844772
5.875	0.107198								0.844726
5.9	0.107208								0.844682
5.925	0.107217								0.844638
5.95	0.107227								0.844594
5.975	0.107236								0.844552
6	0.107245								0.84451
6.025	0.107254								0.844469
6.05	0.107263								0.844429
6.075	0.107271								0.844389
6.1	0.10728								0.84435
6.125	0.107288								0.844312
6.15	0.107296								0.844274
6.175	0.107303								0.844237
6.2	0.107311								0.844201
6.225	0.107319								0.844165
6.25	0.107326								0.84413
6.275	0.107333								0.844096
6.3	0.10734								0.844062
6.325	0.107347								0.844028
6.35	0.107354								0.843996
6.375	0.107361								0.843964
6.4	0.107367								0.843932
6.425	0.107373								0.843901
6.45	0.10738								0.84387
6.475	0.107386								0.84384
6.5	0.107392								0.843811
6.525	0.107398								0.843782
6.55	0.107403								0.843754
6.575	0.107409								0.843726
6.6	0.107414								0.843698
6.625	0.10742								0.843671
6.65	0.107425								0.843645
6.675	0.10743								0.843619
6.7	0.107435								0.843593
6.725	0.10744								0.843568
6.75	0.107445								0.843543
6.775	0.10745								0.843519
6.8	0.107455								0.843495
6.825	0.107459								0.843472
6.85	0.107464								0.843448
6.875	0.107468								0.843426
6.9	0.107473								0.843404
6.925	0.107477								0.843382
6.95	0.107481								0.84336
6.975	0.107485								0.843339
7	0.107489								0.843318
7.025	0.107493								0.843298
7.05	0.107497								0.843278
7.075	0.107501								0.843258
7.1	0.107504								0.843239
7.125	0.107508								0.84322
7.15	0.107511								0.843201
7.175	0.107515								0.843183
7.2	0.107518								0.843165
7.225	0.107522								0.843147
7.25	0.107525								0.84313
7.275	0.107528								0.843113
7.3	0.107531								0.843096
7.325	0.107534								0.843079
7.35	0.107537								0.843063
7.375	0.10754								0.843047
7.4	0.107543								0.843031
7.425	0.107546								0.843016
7.45	0.107549								0.843001
7.475	0.107552								0.842986
7.5	0.107554		0.107394	0.109693					0.842971		0.872227	0.79198
7.525	0.107557								0.842957
7.55	0.107559								0.842943
7.575	0.107562								0.842929
7.6	0.107564								0.842915
7.625	0.107567								0.842902
7.65	0.107569								0.842889
7.675	0.107572								0.842876
7.7	0.107574								0.842863
7.725	0.107576								0.842851
7.75	0.107578								0.842838
7.775	0.107581								0.842826
7.8	0.107583								0.842814
7.825	0.107585								0.842803
7.85	0.107587								0.842791
7.875	0.107589								0.84278
7.9	0.107591								0.842769
7.925	0.107593								0.842758
7.95	0.107595								0.842747
7.975	0.107596								0.842737
8	0.107598								0.842727
8.025	0.1076								0.842716
8.05	0.107602								0.842707
8.075	0.107603								0.842697
8.1	0.107605								0.842687
8.125	0.107607								0.842678
8.15	0.107608								0.842668
8.175	0.10761								0.842659
8.2	0.107612								0.84265
8.225	0.107613								0.842642
8.25	0.107615								0.842633
8.275	0.107616								0.842624
8.3	0.107618								0.842616
8.325	0.107619								0.842608
8.35	0.10762								0.8426
8.375	0.107622								0.842592
8.4	0.107623								0.842584
8.425	0.107624								0.842576
8.45	0.107626								0.842569
8.475	0.107627								0.842561
8.5	0.107628								0.842554
8.525	0.107629								0.842547
8.55	0.107631								0.84254
8.575	0.107632								0.842533
8.6	0.107633								0.842526
8.625	0.107634								0.84252
8.65	0.107635								0.842513
8.675	0.107636								0.842507
8.7	0.107637								0.8425
8.725	0.107638								0.842494
8.75	0.107639								0.842488
8.775	0.10764								0.842482
8.8	0.107641								0.842476
8.825	0.107642								0.842471
8.85	0.107643								0.842465
8.875	0.107644								0.842459
8.9	0.107645								0.842454
8.925	0.107646								0.842448
8.95	0.107647								0.842443
8.975	0.107648								0.842438
9	0.107649								0.842433
9.025	0.107649								0.842428
9.05	0.10765								0.842423
9.075	0.107651								0.842418
9.1	0.107652								0.842413
9.125	0.107653								0.842408
9.15	0.107653								0.842404
9.175	0.107654								0.842399
9.2	0.107655								0.842395
9.225	0.107655								0.84239
9.25	0.107656								0.842386
9.275	0.107657								0.842382
9.3	0.107658								0.842378
9.325	0.107658								0.842374
9.35	0.107659								0.84237
9.375	0.107659								0.842366
9.4	0.10766								0.842362
9.425	0.107661								0.842358
9.45	0.107661								0.842354
9.475	0.107662								0.842351
9.5	0.107663								0.842347
9.525	0.107663								0.842344
9.55	0.107664								0.84234
9.575	0.107664								0.842337
9.6	0.107665								0.842333
9.625	0.107665								0.84233
9.65	0.107666								0.842327
9.675	0.107666								0.842324
9.7	0.107667								0.84232
9.725	0.107667								0.842317
9.75	0.107668								0.842314
9.775	0.107668								0.842311
9.8	0.107669								0.842308
9.825	0.107669								0.842306
9.85	0.10767								0.842303
9.875	0.10767								0.8423
9.9	0.10767								0.842298
9.925	0.107671								0.842295
9.95	0.107671								0.842292
9.975	0.107672								0.842289
10	0.107672		0.099551	0.113817					0.842287		0.882342	0.784833

## Sheet: Fig. 2 - supp1c
time	S1 curve		S1-1 data	S1-2 data	S2 curve		S2-1 data	S2-2 data	S0 curve		S0-1 data	S0-2 data
0	0				0				1
0.025	0.002095		0.002324	0.003374	4.19e-06		0.000917	0	0.997901		0.996748	0.997148
0.05	0.004154		0.010085	0.005737	1.66e-05		0.000705	0.000236	0.995829		0.989719	0.994251
0.075	0.006178		0.013775	0.008711	3.71e-05		0.001402	2.02e-05	0.993784		0.985293	0.992103
0.1	0.008168		0.017433	0.010583	6.54e-05		0.001643	0	0.991766		0.981612	0.990532
0.125	0.010125				0.000101				0.989773
0.15	0.012048				0.000145				0.987807
0.175	0.013938				0.000195				0.985865
0.2	0.015796		0.022566	0.016773	0.000253		0.001088	0	0.983949		0.977349	0.9842
0.225	0.017622				0.000318				0.982058
0.25	0.019416				0.000389				0.980191
0.275	0.02118				0.000467				0.978348
0.3	0.022914		0.02793	0.020744	0.000551		0.002866	0	0.976528		0.968878	0.98039
0.325	0.024617				0.000641				0.974733
0.35	0.026291				0.000737				0.97296
0.375	0.027936				0.000839				0.971211
0.4	0.029552				0.000947				0.969484
0.425	0.031141				0.001061				0.967779
0.45	0.032701				0.001179				0.966096
0.475	0.034234				0.001303				0.964435
0.5	0.03574		0.038623	0.030529	0.001432		0.002006	0.000305	0.962796		0.960118	0.970296
0.525	0.03722				0.001566				0.961178
0.55	0.038673				0.001705				0.95958
0.575	0.040101				0.001848				0.958003
0.6	0.041504				0.001996				0.956447
0.625	0.042881				0.002148				0.954911
0.65	0.044234				0.002304				0.953394
0.675	0.045563				0.002465				0.951897
0.7	0.046869				0.002629				0.95042
0.725	0.04815				0.002798				0.948961
0.75	0.049409				0.00297				0.947522
0.775	0.050645				0.003145				0.946101
0.8	0.051858				0.003324				0.944698
0.825	0.05305				0.003507				0.943313
0.85	0.05422				0.003692				0.941947
0.875	0.055368				0.003881				0.940598
0.9	0.056496				0.004073				0.939266
0.925	0.057603				0.004267				0.937952
0.95	0.058689				0.004465				0.936654
0.975	0.059756				0.004665				0.935374
1	0.060802		0.065523	0.068191	0.004868		0.007371	0.00501	0.93411		0.927839	0.928359
1.025	0.061829				0.005073				0.932862
1.05	0.062837				0.005281				0.93163
1.075	0.063827				0.005491				0.930414
1.1	0.064797				0.005703				0.929214
1.125	0.06575				0.005917				0.92803
1.15	0.066684				0.006134				0.92686
1.175	0.067601				0.006352				0.925706
1.2	0.068501				0.006572				0.924567
1.225	0.069383				0.006794				0.923442
1.25	0.070248				0.007018				0.922332
1.275	0.071097				0.007243				0.921237
1.3	0.07193				0.00747				0.920155
1.325	0.072746				0.007698				0.919088
1.35	0.073547				0.007928				0.918034
1.375	0.074332				0.008158				0.916994
1.4	0.075101				0.008391				0.915967
1.425	0.075856				0.008624				0.914954
1.45	0.076596				0.008858				0.913953
1.475	0.077321				0.009094				0.912966
1.5	0.078031		0.075056	0.079965	0.00933		0.01008	0.008806	0.911991		0.915023	0.91207
1.525	0.078728				0.009567				0.911029
1.55	0.079411				0.009805				0.910079
1.575	0.08008				0.010044				0.909142
1.6	0.080735				0.010284				0.908216
1.625	0.081378				0.010524				0.907303
1.65	0.082007				0.010765				0.906402
1.675	0.082623				0.011006				0.905512
1.7	0.083227				0.011248				0.904633
1.725	0.083818				0.01149				0.903766
1.75	0.084397				0.011733				0.90291
1.775	0.084964				0.011976				0.902065
1.8	0.08552				0.012219				0.901231
1.825	0.086063				0.012462				0.900408
1.85	0.086595				0.012706				0.899596
1.875	0.087116				0.01295				0.898794
1.9	0.087626				0.013193				0.898002
1.925	0.088125				0.013437				0.897221
1.95	0.088613				0.013681				0.896449
1.975	0.08909				0.013925				0.895688
2	0.089558		0.084256	0.089183	0.014168		0.014848	0.012339	0.894936		0.900447	0.899133
2.025	0.090015				0.014412				0.894195
2.05	0.090462				0.014655				0.893462
2.075	0.090899				0.014898				0.892739
2.1	0.091326				0.015141				0.892026
2.125	0.091744				0.015383				0.891322
2.15	0.092153				0.015626				0.890627
2.175	0.092552				0.015867				0.88994
2.2	0.092942				0.016109				0.889263
2.225	0.093323				0.01635				0.888595
2.25	0.093696				0.01659				0.887935
2.275	0.09406				0.01683				0.887283
2.3	0.094415				0.01707				0.88664
2.325	0.094762				0.017309				0.886006
2.35	0.095101				0.017547				0.885379
2.375	0.095431				0.017785				0.884761
2.4	0.095754				0.018022				0.88415
2.425	0.096069				0.018259				0.883548
2.45	0.096377				0.018494				0.882953
2.475	0.096676				0.018729				0.882366
2.5	0.096969				0.018964				0.881786
2.525	0.097254				0.019197				0.881214
2.55	0.097532				0.01943				0.88065
2.575	0.097803				0.019662				0.880092
2.6	0.098067				0.019893				0.879542
2.625	0.098324				0.020123				0.878999
2.65	0.098575				0.020352				0.878463
2.675	0.098819				0.020581				0.877934
2.7	0.099056				0.020808				0.877412
2.725	0.099288				0.021035				0.876897
2.75	0.099513				0.02126				0.876388
2.775	0.099732				0.021485				0.875885
2.8	0.099945				0.021709				0.87539
2.825	0.100152				0.021931				0.8749
2.85	0.100353				0.022153				0.874417
2.875	0.100548				0.022373				0.87394
2.9	0.100738				0.022593				0.87347
2.925	0.100923				0.022811				0.873005
2.95	0.101102				0.023029				0.872547
2.975	0.101275				0.023245				0.872094
3	0.101444		0.093351	0.105179	0.02346		0.024638	0.021358	0.871647		0.879854	0.872516
3.025	0.101607				0.023674				0.871206
3.05	0.101766				0.023887				0.870771
3.075	0.101919				0.024099				0.870341
3.1	0.102068				0.02431				0.869917
3.125	0.102212				0.024519				0.869498
3.15	0.102351				0.024728				0.869085
3.175	0.102485				0.024935				0.868677
3.2	0.102616				0.025141				0.868274
3.225	0.102741				0.025346				0.867877
3.25	0.102863				0.025549				0.867484
3.275	0.10298				0.025752				0.867097
3.3	0.103093				0.025953				0.866715
3.325	0.103201				0.026153				0.866338
3.35	0.103306				0.026351				0.865965
3.375	0.103407				0.026549				0.865597
3.4	0.103504				0.026745				0.865235
3.425	0.103597				0.02694				0.864876
3.45	0.103686				0.027133				0.864523
3.475	0.103772				0.027326				0.864174
3.5	0.103854				0.027517				0.863829
3.525	0.103933				0.027707				0.863489
3.55	0.104008				0.027895				0.863153
3.575	0.10408				0.028083				0.862822
3.6	0.104148				0.028269				0.862495
3.625	0.104213				0.028453				0.862172
3.65	0.104275				0.028637				0.861854
3.675	0.104334				0.028819				0.861539
3.7	0.10439				0.029				0.861229
3.725	0.104443				0.029179				0.860922
3.75	0.104492				0.029357				0.86062
3.775	0.104539				0.029534				0.860321
3.8	0.104583				0.02971				0.860026
3.825	0.104625				0.029884				0.859735
3.85	0.104663				0.030057				0.859448
3.875	0.104699				0.030229				0.859165
3.9	0.104732				0.030399				0.858885
3.925	0.104763				0.030569				0.858609
3.95	0.104791				0.030736				0.858336
3.975	0.104816				0.030903				0.858067
4	0.10484				0.031068				0.857801
4.025	0.10486				0.031232				0.857539
4.05	0.104879				0.031394				0.85728
4.075	0.104895				0.031556				0.857025
4.1	0.104909				0.031716				0.856772
4.125	0.104921				0.031874				0.856524
4.15	0.104931				0.032032				0.856278
4.175	0.104938				0.032188				0.856035
4.2	0.104944				0.032342				0.855796
4.225	0.104947				0.032496				0.85556
4.25	0.104949				0.032648				0.855326
4.275	0.104949				0.032799				0.855096
4.3	0.104947				0.032949				0.854869
4.325	0.104943				0.033097				0.854645
4.35	0.104937				0.033244				0.854423
4.375	0.104929				0.03339				0.854204
4.4	0.10492				0.033534				0.853989
4.425	0.104909				0.033677				0.853776
4.45	0.104896				0.033819				0.853566
4.475	0.104882				0.03396				0.853358
4.5	0.104866				0.034099				0.853153
4.525	0.104849				0.034238				0.852951
4.55	0.10483				0.034375				0.852752
4.575	0.10481				0.03451				0.852555
4.6	0.104788				0.034645				0.85236
4.625	0.104765				0.034778				0.852168
4.65	0.10474				0.03491				0.851979
4.675	0.104715				0.03504				0.851792
4.7	0.104688				0.03517				0.851607
4.725	0.104659				0.035298				0.851425
4.75	0.10463				0.035425				0.851245
4.775	0.104599				0.035551				0.851068
4.8	0.104567				0.035676				0.850892
4.825	0.104534				0.035799				0.850719
4.85	0.104499				0.035921				0.850549
4.875	0.104464				0.036042				0.85038
4.9	0.104427				0.036162				0.850214
4.925	0.10439				0.036281				0.850049
4.95	0.104351				0.036398				0.849887
4.975	0.104312				0.036514				0.849727
5	0.104271		0.100651	0.111181	0.036629		0.036887	0.035122	0.849569		0.852791	0.846313
5.025	0.10423				0.036743				0.849414
5.05	0.104188				0.036856				0.84926
5.075	0.104145				0.036968				0.849108
5.1	0.104101				0.037078				0.848958
5.125	0.104056				0.037188				0.84881
5.15	0.10401				0.037296				0.848664
5.175	0.103963				0.037403				0.84852
5.2	0.103916				0.037509				0.848377
5.225	0.103868				0.037614				0.848237
5.25	0.103819				0.037717				0.848098
5.275	0.10377				0.03782				0.847961
5.3	0.10372				0.037922				0.847826
5.325	0.103669				0.038022				0.847693
5.35	0.103617				0.038121				0.847561
5.375	0.103565				0.03822				0.847431
5.4	0.103513				0.038317				0.847303
5.425	0.103459				0.038413				0.847176
5.45	0.103406				0.038508				0.847051
5.475	0.103351				0.038602				0.846928
5.5	0.103296				0.038695				0.846806
5.525	0.103241				0.038787				0.846686
5.55	0.103185				0.038878				0.846567
5.575	0.103128				0.038967				0.84645
5.6	0.103072				0.039056				0.846335
5.625	0.103014				0.039144				0.846221
5.65	0.102956				0.039231				0.846108
5.675	0.102898				0.039317				0.845997
5.7	0.10284				0.039401				0.845887
5.725	0.102781				0.039485				0.845779
5.75	0.102721				0.039568				0.845672
5.775	0.102662				0.03965				0.845566
5.8	0.102602				0.039731				0.845462
5.825	0.102541				0.03981				0.845359
5.85	0.102481				0.039889				0.845258
5.875	0.10242				0.039967				0.845157
5.9	0.102358				0.040044				0.845059
5.925	0.102297				0.04012				0.844961
5.95	0.102235				0.040196				0.844865
5.975	0.102173				0.04027				0.844769
6	0.102111				0.040343				0.844676
6.025	0.102048				0.040415				0.844583
6.05	0.101985				0.040487				0.844491
6.075	0.101923				0.040557				0.844401
6.1	0.101859				0.040627				0.844312
6.125	0.101796				0.040696				0.844224
6.15	0.101733				0.040764				0.844137
6.175	0.101669				0.040831				0.844051
6.2	0.101605				0.040897				0.843967
6.225	0.101541				0.040962				0.843883
6.25	0.101477				0.041027				0.843801
6.275	0.101413				0.04109				0.843719
6.3	0.101349				0.041153				0.843639
6.325	0.101285				0.041215				0.84356
6.35	0.10122				0.041276				0.843482
6.375	0.101156				0.041336				0.843404
6.4	0.101091				0.041396				0.843328
6.425	0.101027				0.041454				0.843253
6.45	0.100962				0.041512				0.843178
6.475	0.100897				0.041569				0.843105
6.5	0.100833				0.041625				0.843033
6.525	0.100768				0.041681				0.842961
6.55	0.100703				0.041735				0.842891
6.575	0.100638				0.041789				0.842821
6.6	0.100573				0.041842				0.842752
6.625	0.100509				0.041895				0.842685
6.65	0.100444				0.041946				0.842618
6.675	0.100379				0.041997				0.842551
6.7	0.100314				0.042047				0.842486
6.725	0.100249				0.042097				0.842422
6.75	0.100185				0.042145				0.842358
6.775	0.10012				0.042193				0.842296
6.8	0.100056				0.04224				0.842234
6.825	0.099991				0.042287				0.842172
6.85	0.099927				0.042333				0.842112
6.875	0.099862				0.042378				0.842053
6.9	0.099798				0.042422				0.841994
6.925	0.099734				0.042466				0.841936
6.95	0.09967				0.042509				0.841878
6.975	0.099605				0.042551				0.841822
7	0.099541				0.042593				0.841766
7.025	0.099478				0.042634				0.841711
7.05	0.099414				0.042674				0.841657
7.075	0.09935				0.042714				0.841603
7.1	0.099287				0.042753				0.84155
7.125	0.099223				0.042791				0.841498
7.15	0.09916				0.042829				0.841446
7.175	0.099097				0.042866				0.841395
7.2	0.099034				0.042902				0.841345
7.225	0.098971				0.042938				0.841295
7.25	0.098908				0.042974				0.841246
7.275	0.098846				0.043008				0.841198
7.3	0.098783				0.043042				0.84115
7.325	0.098721				0.043076				0.841103
7.35	0.098659				0.043109				0.841056
7.375	0.098597				0.043141				0.84101
7.4	0.098535				0.043173				0.840965
7.425	0.098473				0.043204				0.84092
7.45	0.098412				0.043234				0.840876
7.475	0.098351				0.043264				0.840832
7.5	0.098289		0.096606	0.105992	0.043294		0.04485	0.044522	0.840789		0.843142	0.831742
7.525	0.098229				0.043323				0.840747
7.55	0.098168				0.043351				0.840705
7.575	0.098107				0.043379				0.840663
7.6	0.098047				0.043406				0.840623
7.625	0.097987				0.043433				0.840582
7.65	0.097927				0.043459				0.840542
7.675	0.097867				0.043485				0.840503
7.7	0.097807				0.04351				0.840464
7.725	0.097748				0.043535				0.840426
7.75	0.097689				0.043559				0.840388
7.775	0.09763				0.043583				0.840351
7.8	0.097571				0.043606				0.840314
7.825	0.097513				0.043629				0.840278
7.85	0.097454				0.043651				0.840242
7.875	0.097396				0.043672				0.840207
7.9	0.097338				0.043694				0.840172
7.925	0.09728				0.043714				0.840137
7.95	0.097223				0.043735				0.840103
7.975	0.097166				0.043755				0.840069
8	0.097109				0.043774				0.840036
8.025	0.097052				0.043793				0.840003
8.05	0.096995				0.043811				0.839971
8.075	0.096939				0.043829				0.839939
8.1	0.096883				0.043847				0.839908
8.125	0.096827				0.043864				0.839877
8.15	0.096771				0.043881				0.839846
8.175	0.096716				0.043897				0.839816
8.2	0.096661				0.043913				0.839786
8.225	0.096606				0.043929				0.839756
8.25	0.096551				0.043944				0.839727
8.275	0.096497				0.043958				0.839698
8.3	0.096443				0.043973				0.83967
8.325	0.096389				0.043987				0.839642
8.35	0.096335				0.044				0.839614
8.375	0.096281				0.044013				0.839587
8.4	0.096228				0.044026				0.83956
8.425	0.096175				0.044038				0.839533
8.45	0.096122				0.04405				0.839507
8.475	0.09607				0.044062				0.839481
8.5	0.096018				0.044073				0.839456
8.525	0.095966				0.044084				0.83943
8.55	0.095914				0.044094				0.839405
8.575	0.095862				0.044104				0.839381
8.6	0.095811				0.044114				0.839356
8.625	0.09576				0.044124				0.839332
8.65	0.095709				0.044133				0.839309
8.675	0.095659				0.044142				0.839285
8.7	0.095608				0.04415				0.839262
8.725	0.095558				0.044158				0.83924
8.75	0.095509				0.044166				0.839217
8.775	0.095459				0.044173				0.839195
8.8	0.09541				0.04418				0.839173
8.825	0.095361				0.044187				0.839151
8.85	0.095312				0.044194				0.83913
8.875	0.095263				0.0442				0.839109
8.9	0.095215				0.044206				0.839088
8.925	0.095167				0.044211				0.839068
8.95	0.095119				0.044217				0.839048
8.975	0.095072				0.044222				0.839028
9	0.095025				0.044226				0.839008
9.025	0.094977				0.044231				0.838988
9.05	0.094931				0.044235				0.838969
9.075	0.094884				0.044239				0.83895
9.1	0.094838				0.044242				0.838931
9.125	0.094792				0.044245				0.838913
9.15	0.094746				0.044248				0.838895
9.175	0.094701				0.044251				0.838877
9.2	0.094655				0.044254				0.838859
9.225	0.09461				0.044256				0.838841
9.25	0.094566				0.044258				0.838824
9.275	0.094521				0.04426				0.838807
9.3	0.094477				0.044261				0.83879
9.325	0.094433				0.044262				0.838773
9.35	0.094389				0.044263				0.838757
9.375	0.094345				0.044264				0.838741
9.4	0.094302				0.044265				0.838725
9.425	0.094259				0.044265				0.838709
9.45	0.094216				0.044265				0.838693
9.475	0.094174				0.044265				0.838678
9.5	0.094131				0.044264				0.838663
9.525	0.094089				0.044264				0.838648
9.55	0.094048				0.044263				0.838633
9.575	0.094006				0.044262				0.838618
9.6	0.093965				0.04426				0.838604
9.625	0.093924				0.044259				0.838589
9.65	0.093883				0.044257				0.838575
9.675	0.093842				0.044255				0.838561
9.7	0.093802				0.044253				0.838548
9.725	0.093762				0.044251				0.838534
9.75	0.093722				0.044248				0.838521
9.775	0.093682				0.044246				0.838508
9.8	0.093643				0.044243				0.838495
9.825	0.093603				0.04424				0.838482
9.85	0.093565				0.044236				0.838469
9.875	0.093526				0.044233				0.838457
9.9	0.093487				0.044229				0.838444
9.925	0.093449				0.044225				0.838432
9.95	0.093411				0.044221				0.83842
9.975	0.093374				0.044217				0.838408
10	0.093336		0.095806	0.086359	0.044213		0.047535	0.040239	0.838396		0.831382	0.852123

## Sheet: Fig. 2 - supp2b
time	S1 curve		S1-1 data	S1-2 data					S0 curve		S0-1 data	S0-2 data
0	0								1
0.025	0.001608								0.998387
0.05	0.003196		0.0112	0.012324					0.996787		0.988381	0.988452
0.075	0.004763								0.995198
0.1	0.00631		0.017846	0.014979					0.993621		0.98199	0.984122
0.125	0.007837								0.992055
0.15	0.009344								0.990501
0.175	0.010832								0.988959
0.2	0.0123								0.987428
0.225	0.01375								0.985909
0.25	0.015181								0.984401
0.275	0.016594								0.982904
0.3	0.017989		0.030401	0.026355					0.981418		0.968178	0.972579
0.325	0.019365								0.979943
0.35	0.020725								0.978479
0.375	0.022066								0.977026
0.4	0.023391								0.975584
0.425	0.024698								0.974153
0.45	0.025989								0.972732
0.475	0.027263								0.971321
0.5	0.028521		0.04131	0.03348					0.969921		0.955212	0.966007
0.525	0.029763								0.968532
0.55	0.030989								0.967153
0.575	0.0322								0.965784
0.6	0.033395								0.964425
0.625	0.034575								0.963076
0.65	0.03574								0.961738
0.675	0.03689								0.960409
0.7	0.038025								0.95909
0.725	0.039146								0.957781
0.75	0.040253								0.956482
0.775	0.041345								0.955192
0.8	0.042424								0.953912
0.825	0.043489								0.952641
0.85	0.044541								0.95138
0.875	0.045579								0.950128
0.9	0.046604								0.948885
0.925	0.047616								0.947652
0.95	0.048616								0.946428
0.975	0.049602								0.945213
1	0.050577		0.055584	0.048602					0.944007		0.939808	0.947757
1.025	0.051539								0.94281
1.05	0.052489								0.941621
1.075	0.053427								0.940442
1.1	0.054353								0.939271
1.125	0.055267								0.938109
1.15	0.05617								0.936956
1.175	0.057062								0.935811
1.2	0.057942								0.934675
1.225	0.058812								0.933547
1.25	0.05967								0.932427
1.275	0.060518								0.931316
1.3	0.061355								0.930213
1.325	0.062182								0.929119
1.35	0.062998								0.928032
1.375	0.063804								0.926953
1.4	0.0646								0.925883
1.425	0.065387								0.92482
1.45	0.066163								0.923765
1.475	0.06693								0.922719
1.5	0.067687		0.082477	0.062039					0.921679		0.907063	0.931379
1.525	0.068434								0.920648
1.55	0.069173								0.919624
1.575	0.069902								0.918608
1.6	0.070622								0.917599
1.625	0.071333								0.916598
1.65	0.072036								0.915605
1.675	0.07273								0.914618
1.7	0.073415								0.913639
1.725	0.074091								0.912668
1.75	0.07476								0.911703
1.775	0.07542								0.910746
1.8	0.076072								0.909795
1.825	0.076715								0.908852
1.85	0.077351								0.907916
1.875	0.077979								0.906987
1.9	0.0786								0.906064
1.925	0.079212								0.905149
1.95	0.079818								0.90424
1.975	0.080415								0.903338
2	0.081006		0.102427	0.08501					0.902443		0.876185	0.89797
2.025	0.081589								0.901554
2.05	0.082165								0.900672
2.075	0.082734								0.899797
2.1	0.083296								0.898928
2.125	0.083851								0.898065
2.15	0.084399								0.897209
2.175	0.084941								0.896359
2.2	0.085476								0.895516
2.225	0.086005								0.894679
2.25	0.086527								0.893848
2.275	0.087043								0.893023
2.3	0.087552								0.892204
2.325	0.088055								0.891391
2.35	0.088553								0.890585
2.375	0.089044								0.889784
2.4	0.089529								0.888989
2.425	0.090008								0.888201
2.45	0.090482								0.887418
2.475	0.09095								0.886641
2.5	0.091412								0.885869
2.525	0.091868								0.885104
2.55	0.09232								0.884344
2.575	0.092765								0.883589
2.6	0.093205								0.882841
2.625	0.09364								0.882098
2.65	0.09407								0.88136
2.675	0.094495								0.880628
2.7	0.094914								0.879901
2.725	0.095329								0.87918
2.75	0.095738								0.878464
2.775	0.096143								0.877753
2.8	0.096543								0.877048
2.825	0.096938								0.876348
2.85	0.097328								0.875653
2.875	0.097714								0.874963
2.9	0.098095								0.874278
2.925	0.098471								0.873599
2.95	0.098843								0.872924
2.975	0.099211								0.872255
3	0.099574		0.105093	0.088406					0.87159		0.868726	0.88915
3.025	0.099933								0.87093
3.05	0.100287								0.870276
3.075	0.100638								0.869626
3.1	0.100984								0.868981
3.125	0.101326								0.86834
3.15	0.101665								0.867705
3.175	0.101999								0.867074
3.2	0.102329								0.866448
3.225	0.102655								0.865826
3.25	0.102978								0.86521
3.275	0.103296								0.864597
3.3	0.103611								0.86399
3.325	0.103923								0.863386
3.35	0.10423								0.862788
3.375	0.104534								0.862193
3.4	0.104835								0.861603
3.425	0.105132								0.861018
3.45	0.105425								0.860437
3.475	0.105715								0.85986
3.5	0.106002								0.859287
3.525	0.106285								0.858719
3.55	0.106565								0.858155
3.575	0.106842								0.857595
3.6	0.107116								0.857039
3.625	0.107386								0.856488
3.65	0.107653								0.85594
3.675	0.107917								0.855397
3.7	0.108178								0.854857
3.725	0.108436								0.854322
3.75	0.108691								0.85379
3.775	0.108944								0.853263
3.8	0.109193								0.852739
3.825	0.109439								0.852219
3.85	0.109683								0.851704
3.875	0.109923								0.851192
3.9	0.110161								0.850683
3.925	0.110397								0.850179
3.95	0.110629								0.849678
3.975	0.110859								0.849181
4	0.111086								0.848688
4.025	0.111311								0.848198
4.05	0.111533								0.847712
4.075	0.111752								0.84723
4.1	0.111969								0.846751
4.125	0.112184								0.846276
4.15	0.112396								0.845804
4.175	0.112606								0.845336
4.2	0.112813								0.844871
4.225	0.113018								0.84441
4.25	0.113221								0.843952
4.275	0.113421								0.843497
4.3	0.113619								0.843046
4.325	0.113815								0.842598
4.35	0.114009								0.842154
4.375	0.1142								0.841713
4.4	0.114389								0.841275
4.425	0.114576								0.84084
4.45	0.114761								0.840409
4.475	0.114944								0.839981
4.5	0.115125								0.839556
4.525	0.115304								0.839134
4.55	0.115481								0.838715
4.575	0.115656								0.838299
4.6	0.115829								0.837887
4.625	0.116								0.837477
4.65	0.116169								0.837071
4.675	0.116336								0.836667
4.7	0.116502								0.836267
4.725	0.116665								0.83587
4.75	0.116827								0.835475
4.775	0.116987								0.835083
4.8	0.117145								0.834695
4.825	0.117301								0.834309
4.85	0.117456								0.833926
4.875	0.117609								0.833546
4.9	0.11776								0.833169
4.925	0.11791								0.832794
4.95	0.118058								0.832423
4.975	0.118204								0.832054
5	0.118349		0.116222	0.104121					0.831688		0.833151	0.856333
5.025	0.118492								0.831324
5.05	0.118634								0.830963
5.075	0.118774								0.830605
5.1	0.118912								0.83025
5.125	0.119049								0.829897
5.15	0.119185								0.829547
5.175	0.119319								0.829199
5.2	0.119451								0.828854
5.225	0.119582								0.828512
5.25	0.119712								0.828172
5.275	0.11984								0.827835
5.3	0.119967								0.8275
5.325	0.120092								0.827167
5.35	0.120216								0.826837
5.375	0.120339								0.82651
5.4	0.120461								0.826185
5.425	0.120581								0.825862
5.45	0.1207								0.825542
5.475	0.120817								0.825224
5.5	0.120934								0.824909
5.525	0.121049								0.824595
5.55	0.121162								0.824285
5.575	0.121275								0.823976
5.6	0.121386								0.82367
5.625	0.121497								0.823366
5.65	0.121606								0.823064
5.675	0.121713								0.822765
5.7	0.12182								0.822468
5.725	0.121926								0.822173
5.75	0.12203								0.82188
5.775	0.122133								0.821589
5.8	0.122236								0.8213
5.825	0.122337								0.821014
5.85	0.122437								0.82073
5.875	0.122536								0.820448
5.9	0.122634								0.820168
5.925	0.122731								0.81989
5.95	0.122827								0.819614
5.975	0.122921								0.81934
6	0.123015		0.128051	0.107621					0.819068		0.812753	0.844728
6.025	0.123108								0.818798
6.05	0.1232								0.818531
6.075	0.123291								0.818265
6.1	0.123381								0.818001
6.125	0.12347								0.817739
6.15	0.123558								0.817479
6.175	0.123646								0.817221
6.2	0.123732								0.816965
6.225	0.123817								0.816711
6.25	0.123902								0.816459
6.275	0.123985								0.816208
6.3	0.124068								0.81596
6.325	0.12415								0.815713
6.35	0.124231								0.815468
6.375	0.124311								0.815225
6.4	0.124391								0.814984
6.425	0.124469								0.814744
6.45	0.124547								0.814506
6.475	0.124624								0.81427
6.5	0.1247								0.814036
6.525	0.124775								0.813804
6.55	0.12485								0.813573
6.575	0.124924								0.813344
6.6	0.124997								0.813117
6.625	0.125069								0.812891
6.65	0.125141								0.812667
6.675	0.125212								0.812445
6.7	0.125282								0.812224
6.725	0.125351								0.812005
6.75	0.12542								0.811788
6.775	0.125488								0.811572
6.8	0.125555								0.811358
6.825	0.125622								0.811145
6.85	0.125688								0.810934
6.875	0.125753								0.810725
6.9	0.125818								0.810517
6.925	0.125882								0.810311
6.95	0.125945								0.810106
6.975	0.126008								0.809903
7	0.12607								0.809701
7.025	0.126131								0.809501
7.05	0.126192								0.809302
7.075	0.126252								0.809104
7.1	0.126312								0.808909
7.125	0.126371								0.808714
7.15	0.126429								0.808521
7.175	0.126487								0.80833
7.2	0.126544								0.80814
7.225	0.126601								0.807951
7.25	0.126657								0.807764
7.275	0.126713								0.807578
7.3	0.126768								0.807393
7.325	0.126822								0.80721
7.35	0.126876								0.807028
7.375	0.126929								0.806848
7.4	0.126982								0.806669
7.425	0.127034								0.806491
7.45	0.127086								0.806315
7.475	0.127138								0.806139
7.5	0.127188								0.805966
7.525	0.127239								0.805793
7.55	0.127288								0.805622
7.575	0.127338								0.805452
7.6	0.127386								0.805283
7.625	0.127435								0.805116
7.65	0.127483								0.804949
7.675	0.12753								0.804784
7.7	0.127577								0.804621
7.725	0.127623								0.804458
7.75	0.127669								0.804297
7.775	0.127715								0.804136
7.8	0.12776								0.803977
7.825	0.127805								0.80382
7.85	0.127849								0.803663
7.875	0.127893								0.803508
7.9	0.127936								0.803353
7.925	0.127979								0.8032
7.95	0.128022								0.803048
7.975	0.128064								0.802897
8	0.128106		0.139058	0.121857					0.802747		0.788044	0.815575
8.025	0.128147								0.802599
8.05	0.128188								0.802451
8.075	0.128229								0.802305
8.1	0.128269								0.802159
8.125	0.128308								0.802015
8.15	0.128348								0.801872
8.175	0.128387								0.80173
8.2	0.128425								0.801589
8.225	0.128464								0.801448
8.25	0.128502								0.801309
8.275	0.128539								0.801171
8.3	0.128576								0.801034
8.325	0.128613								0.800899
8.35	0.12865								0.800764
8.375	0.128686								0.80063
8.4	0.128722								0.800497
8.425	0.128757								0.800365
8.45	0.128792								0.800234
8.475	0.128827								0.800104
8.5	0.128861								0.799975
8.525	0.128896								0.799847
8.55	0.128929								0.79972
8.575	0.128963								0.799593
8.6	0.128996								0.799468
8.625	0.129029								0.799344
8.65	0.129061								0.79922
8.675	0.129094								0.799098
8.7	0.129126								0.798976
8.725	0.129157								0.798856
8.75	0.129189								0.798736
8.775	0.12922								0.798617
8.8	0.12925								0.798499
8.825	0.129281								0.798382
8.85	0.129311								0.798266
8.875	0.129341								0.79815
8.9	0.129371								0.798036
8.925	0.1294								0.797922
8.95	0.129429								0.797809
8.975	0.129458								0.797697
9	0.129486								0.797586
9.025	0.129515								0.797476
9.05	0.129543								0.797366
9.075	0.12957								0.797257
9.1	0.129598								0.797149
9.125	0.129625								0.797042
9.15	0.129652								0.796936
9.175	0.129679								0.79683
9.2	0.129705								0.796726
9.225	0.129732								0.796622
9.25	0.129758								0.796518
9.275	0.129783								0.796416
9.3	0.129809								0.796314
9.325	0.129834								0.796213
9.35	0.129859								0.796113
9.375	0.129884								0.796014
9.4	0.129909								0.795915
9.425	0.129933								0.795817
9.45	0.129957								0.79572
9.475	0.129981								0.795624
9.5	0.130005								0.795528
9.525	0.130029								0.795433
9.55	0.130052								0.795338
9.575	0.130075								0.795245
9.6	0.130098								0.795152
9.625	0.130121								0.795059
9.65	0.130143								0.794968
9.675	0.130165								0.794877
9.7	0.130187								0.794787
9.725	0.130209								0.794697
9.75	0.130231								0.794608
9.775	0.130252								0.79452
9.8	0.130274								0.794432
9.825	0.130295								0.794345
9.85	0.130316								0.794259
9.875	0.130336								0.794173
9.9	0.130357								0.794088
9.925	0.130377								0.794004
9.95	0.130398								0.79392
9.975	0.130417								0.793837
10	0.130437		0.13509	0.134029					0.793754		0.774654	0.78621

## Sheet: Fig. 2 - supp 2d
time	S1 curve		S1-1 data	S1-2 data					S0 curve		S0-1 data	S0-2 data
0	0								1
0.025	0.000784								0.999215
0.05	0.001559								0.998434
0.075	0.002327								0.997657
0.1	0.003088		0.007	0.003108					0.996884		0.992062	0.992241
0.125	0.003841								0.996116
0.15	0.004586								0.995352
0.175	0.005324								0.994592
0.2	0.006055								0.993837
0.225	0.006779								0.993085
0.25	0.007495								0.992338
0.275	0.008205								0.991594
0.3	0.008907		0.00721	0.011046					0.990855		0.993475	0.984482
0.325	0.009603								0.99012
0.35	0.010292								0.989389
0.375	0.010974								0.988662
0.4	0.011649								0.987938
0.425	0.012318								0.987219
0.45	0.01298								0.986504
0.475	0.013636								0.985793
0.5	0.014285		0.010389	0.020462					0.985085		0.989927	0.97599
0.525	0.014928								0.984382
0.55	0.015565								0.983682
0.575	0.016196								0.982986
0.6	0.01682								0.982294
0.625	0.017439								0.981606
0.65	0.018051								0.980922
0.675	0.018658								0.980241
0.7	0.019259								0.979564
0.725	0.019854								0.978891
0.75	0.020443								0.978221
0.775	0.021027								0.977555
0.8	0.021605								0.976893
0.825	0.022177								0.976234
0.85	0.022744								0.975579
0.875	0.023306								0.974928
0.9	0.023862								0.97428
0.925	0.024413								0.973636
0.95	0.024958								0.972995
0.975	0.025499								0.972358
1	0.026034		0.021963	0.034206					0.971724		0.977674	0.962287
1.025	0.026564								0.971094
1.05	0.027089								0.970467
1.075	0.02761								0.969844
1.1	0.028125								0.969224
1.125	0.028635								0.968607
1.15	0.029141								0.967994
1.175	0.029642								0.967384
1.2	0.030138								0.966778
1.225	0.03063								0.966175
1.25	0.031117								0.965575
1.275	0.031599								0.964979
1.3	0.032077								0.964385
1.325	0.03255								0.963795
1.35	0.033019								0.963209
1.375	0.033484								0.962625
1.4	0.033944								0.962045
1.425	0.0344								0.961468
1.45	0.034851								0.960894
1.475	0.035299								0.960323
1.5	0.035742								0.959755
1.525	0.036182								0.95919
1.55	0.036617								0.958629
1.575	0.037048								0.95807
1.6	0.037475								0.957515
1.625	0.037899								0.956963
1.65	0.038318								0.956414
1.675	0.038734								0.955867
1.7	0.039145								0.955324
1.725	0.039553								0.954784
1.75	0.039958								0.954246
1.775	0.040358								0.953712
1.8	0.040755								0.953181
1.825	0.041149								0.952652
1.85	0.041538								0.952126
1.875	0.041924								0.951604
1.9	0.042307								0.951084
1.925	0.042686								0.950567
1.95	0.043062								0.950052
1.975	0.043435								0.949541
2	0.043804		0.040594	0.048253					0.949032		0.95516	0.943278
2.025	0.044169								0.948527
2.05	0.044532								0.948024
2.075	0.044891								0.947523
2.1	0.045247								0.947026
2.125	0.0456								0.946531
2.15	0.045949								0.946039
2.175	0.046296								0.94555
2.2	0.046639								0.945063
2.225	0.046979								0.944579
2.25	0.047317								0.944098
2.275	0.047651								0.943619
2.3	0.047982								0.943143
2.325	0.048311								0.942669
2.35	0.048636								0.942198
2.375	0.048959								0.94173
2.4	0.049279								0.941264
2.425	0.049596								0.940801
2.45	0.04991								0.940341
2.475	0.050221								0.939883
2.5	0.05053								0.939427
2.525	0.050836								0.938974
2.55	0.051139								0.938523
2.575	0.05144								0.938075
2.6	0.051738								0.937629
2.625	0.052033								0.937186
2.65	0.052326								0.936745
2.675	0.052616								0.936307
2.7	0.052904								0.935871
2.725	0.053189								0.935437
2.75	0.053472								0.935006
2.775	0.053753								0.934577
2.8	0.05403								0.934151
2.825	0.054306								0.933727
2.85	0.054579								0.933305
2.875	0.05485								0.932885
2.9	0.055119								0.932468
2.925	0.055385								0.932053
2.95	0.055649								0.93164
2.975	0.05591								0.93123
3	0.05617		0.063462	0.056943					0.930822		0.92289	0.928237
3.025	0.056427								0.930416
3.05	0.056682								0.930012
3.075	0.056935								0.929611
3.1	0.057186								0.929212
3.125	0.057434								0.928815
3.15	0.057681								0.92842
3.175	0.057925								0.928027
3.2	0.058167								0.927636
3.225	0.058408								0.927248
3.25	0.058646								0.926862
3.275	0.058882								0.926477
3.3	0.059117								0.926095
3.325	0.059349								0.925715
3.35	0.059579								0.925337
3.375	0.059808								0.924962
3.4	0.060034								0.924588
3.425	0.060259								0.924216
3.45	0.060482								0.923847
3.475	0.060703								0.923479
3.5	0.060922								0.923113
3.525	0.061139								0.92275
3.55	0.061355								0.922388
3.575	0.061568								0.922028
3.6	0.06178								0.921671
3.625	0.06199								0.921315
3.65	0.062199								0.920961
3.675	0.062406								0.920609
3.7	0.062611								0.920259
3.725	0.062814								0.919912
3.75	0.063016								0.919565
3.775	0.063216								0.919221
3.8	0.063414								0.918879
3.825	0.063611								0.918539
3.85	0.063806								0.9182
3.875	0.064								0.917863
3.9	0.064192								0.917529
3.925	0.064383								0.917196
3.95	0.064571								0.916864
3.975	0.064759								0.916535
4	0.064945								0.916208
4.025	0.065129								0.915882
4.05	0.065312								0.915558
4.075	0.065494								0.915236
4.1	0.065674								0.914915
4.125	0.065852								0.914597
4.15	0.066029								0.91428
4.175	0.066205								0.913965
4.2	0.066379								0.913651
4.225	0.066552								0.913339
4.25	0.066724								0.913029
4.275	0.066894								0.912721
4.3	0.067063								0.912414
4.325	0.067231								0.912109
4.35	0.067397								0.911806
4.375	0.067562								0.911505
4.4	0.067725								0.911205
4.425	0.067887								0.910906
4.45	0.068048								0.91061
4.475	0.068208								0.910315
4.5	0.068367								0.910021
4.525	0.068524								0.909729
4.55	0.06868								0.909439
4.575	0.068835								0.909151
4.6	0.068988								0.908864
4.625	0.069141								0.908578
4.65	0.069292								0.908294
4.675	0.069442								0.908012
4.7	0.069591								0.907731
4.725	0.069739								0.907452
4.75	0.069885								0.907174
4.775	0.070031								0.906898
4.8	0.070175								0.906623
4.825	0.070318								0.90635
4.85	0.07046								0.906078
4.875	0.070601								0.905808
4.9	0.070741								0.905539
4.925	0.07088								0.905272
4.95	0.071018								0.905006
4.975	0.071154								0.904742
5	0.07129		0.066047	0.078652					0.904479		0.916228	0.894443
5.025	0.071425								0.904218
5.05	0.071558								0.903958
5.075	0.071691								0.903699
5.1	0.071823								0.903442
5.125	0.071953								0.903186
5.15	0.072083								0.902932
5.175	0.072212								0.902679
5.2	0.072339								0.902428
5.225	0.072466								0.902177
5.25	0.072592								0.901929
5.275	0.072717								0.901681
5.3	0.07284								0.901435
5.325	0.072963								0.90119
5.35	0.073085								0.900947
5.375	0.073206								0.900705
5.4	0.073327								0.900464
5.425	0.073446								0.900225
5.45	0.073564								0.899987
5.475	0.073682								0.89975
5.5	0.073799								0.899515
5.525	0.073914								0.89928
5.55	0.074029								0.899048
5.575	0.074143								0.898816
5.6	0.074257								0.898586
5.625	0.074369								0.898356
5.65	0.074481								0.898129
5.675	0.074591								0.897902
5.7	0.074701								0.897677
5.725	0.074811								0.897453
5.75	0.074919								0.89723
5.775	0.075026								0.897008
5.8	0.075133								0.896788
5.825	0.075239								0.896568
5.85	0.075344								0.89635
5.875	0.075449								0.896134
5.9	0.075552								0.895918
5.925	0.075655								0.895703
5.95	0.075758								0.89549
5.975	0.075859								0.895278
6	0.07596		0.068515	0.082877					0.895067		0.906671	0.886873
6.025	0.07606								0.894857
6.05	0.076159								0.894649
6.075	0.076257								0.894441
6.1	0.076355								0.894235
6.125	0.076452								0.89403
6.15	0.076549								0.893825
6.175	0.076645								0.893623
6.2	0.07674								0.893421
6.225	0.076834								0.89322
6.25	0.076928								0.89302
6.275	0.077021								0.892822
6.3	0.077113								0.892624
6.325	0.077205								0.892428
6.35	0.077296								0.892232
6.375	0.077386								0.892038
6.4	0.077476								0.891845
6.425	0.077565								0.891653
6.45	0.077654								0.891462
6.475	0.077741								0.891272
6.5	0.077829								0.891083
6.525	0.077915								0.890895
6.55	0.078001								0.890708
6.575	0.078087								0.890522
6.6	0.078172								0.890337
6.625	0.078256								0.890153
6.65	0.078339								0.889971
6.675	0.078422								0.889789
6.7	0.078505								0.889608
6.725	0.078587								0.889428
6.75	0.078668								0.889249
6.775	0.078749								0.889071
6.8	0.078829								0.888894
6.825	0.078909								0.888718
6.85	0.078988								0.888544
6.875	0.079066								0.888369
6.9	0.079144								0.888196
6.925	0.079222								0.888024
6.95	0.079299								0.887853
6.975	0.079375								0.887683
7	0.079451								0.887514
7.025	0.079526								0.887345
7.05	0.079601								0.887178
7.075	0.079675								0.887011
7.1	0.079749								0.886846
7.125	0.079822								0.886681
7.15	0.079895								0.886517
7.175	0.079967								0.886354
7.2	0.080039								0.886192
7.225	0.08011								0.886031
7.25	0.080181								0.885871
7.275	0.080251								0.885712
7.3	0.080321								0.885553
7.325	0.080391								0.885396
7.35	0.08046								0.885239
7.375	0.080528								0.885083
7.4	0.080596								0.884928
7.425	0.080663								0.884774
7.45	0.08073								0.88462
7.475	0.080797								0.884468
7.5	0.080863								0.884316
7.525	0.080929								0.884165
7.55	0.080994								0.884015
7.575	0.081059								0.883866
7.6	0.081123								0.883718
7.625	0.081187								0.88357
7.65	0.081251								0.883424
7.675	0.081314								0.883278
7.7	0.081377								0.883133
7.725	0.081439								0.882988
7.75	0.081501								0.882845
7.775	0.081562								0.882702
7.8	0.081623								0.88256
7.825	0.081684								0.882419
7.85	0.081744								0.882278
7.875	0.081804								0.882139
7.9	0.081863								0.882
7.925	0.081922								0.881862
7.95	0.081981								0.881724
7.975	0.082039								0.881588
8	0.082097		0.081962	0.086315					0.881452		0.882674	0.873247
8.025	0.082154								0.881317
8.05	0.082211								0.881182
8.075	0.082268								0.881049
8.1	0.082324								0.880916
8.125	0.08238								0.880784
8.15	0.082436								0.880652
8.175	0.082491								0.880522
8.2	0.082546								0.880391
8.225	0.082601								0.880262
8.25	0.082655								0.880134
8.275	0.082709								0.880006
8.3	0.082762								0.879879
8.325	0.082815								0.879752
8.35	0.082868								0.879626
8.375	0.08292								0.879501
8.4	0.082972								0.879377
8.425	0.083024								0.879253
8.45	0.083076								0.87913
8.475	0.083127								0.879008
8.5	0.083177								0.878886
8.525	0.083228								0.878765
8.55	0.083278								0.878644
8.575	0.083328								0.878525
8.6	0.083377								0.878406
8.625	0.083426								0.878287
8.65	0.083475								0.87817
8.675	0.083523								0.878052
8.7	0.083572								0.877936
8.725	0.083619								0.87782
8.75	0.083667								0.877705
8.775	0.083714								0.87759
8.8	0.083761								0.877476
8.825	0.083808								0.877363
8.85	0.083854								0.87725
8.875	0.0839								0.877138
8.9	0.083946								0.877027
8.925	0.083991								0.876916
8.95	0.084037								0.876806
8.975	0.084082								0.876696
9	0.084126								0.876587
9.025	0.08417								0.876479
9.05	0.084214								0.876371
9.075	0.084258								0.876264
9.1	0.084302								0.876157
9.125	0.084345								0.876051
9.15	0.084388								0.875945
9.175	0.08443								0.875841
9.2	0.084473								0.875736
9.225	0.084515								0.875632
9.25	0.084557								0.875529
9.275	0.084598								0.875427
9.3	0.08464								0.875325
9.325	0.084681								0.875223
9.35	0.084722								0.875122
9.375	0.084762								0.875022
9.4	0.084802								0.874922
9.425	0.084842								0.874823
9.45	0.084882								0.874724
9.475	0.084922								0.874626
9.5	0.084961								0.874528
9.525	0.085								0.874431
9.55	0.085039								0.874334
9.575	0.085078								0.874238
9.6	0.085116								0.874143
9.625	0.085154								0.874048
9.65	0.085192								0.873953
9.675	0.085229								0.873859
9.7	0.085267								0.873766
9.725	0.085304								0.873673
9.75	0.085341								0.87358
9.775	0.085377								0.873488
9.8	0.085414								0.873397
9.825	0.085449								0.873308
9.85	0.085485								0.873219
9.875	0.08552								0.873129
9.9	0.085556								0.87304
9.925	0.085591								0.872951
9.95	0.085627								0.872862
9.975	0.085662								0.872772
10	0.085697		0.084542	0.093447					0.872683		0.875231	0.863982

## Sheet: Fig. 2 - supp3b
time	S1 curve		S1-1 data	S1-2 data					S0 curve		S0-1 data	S0-2 data
0	0								1
0.025	0.068477		0.058971	0.061263					0.931323		0.939122	0.937131
0.05	0.128957		0.145581	0.133163					0.870274		0.855098	0.863779
0.075	0.182332		0.231855	0.226911					0.816007		0.768759	0.769185
0.1	0.229397		0.28351	0.266232					0.767768		0.718684	0.728625
0.125	0.270856								0.724887
0.15	0.307337								0.68677
0.175	0.339396								0.652887
0.2	0.367529		0.367181	0.336746					0.622768		0.631995	0.658764
0.225	0.392176								0.595994
0.25	0.413728								0.572194
0.275	0.432534								0.551038
0.3	0.448901		0.394057	0.368756					0.532233		0.603709	0.623799
0.325	0.463106								0.515516
0.35	0.475391								0.500656
0.375	0.485975								0.487447
0.4	0.495049								0.475705
0.425	0.502786								0.465267
0.45	0.509337								0.455989
0.475	0.514838								0.447741
0.5	0.519409		0.425631	0.405838					0.44041		0.561336	0.576127
0.525	0.523157								0.433893
0.55	0.526176								0.4281
0.575	0.528552								0.42295
0.6	0.53036								0.418372
0.625	0.531665								0.414303
0.65	0.532527								0.410686
0.675	0.532999								0.407471
0.7	0.533126								0.404613
0.725	0.532952								0.402072
0.75	0.532512								0.399814
0.775	0.531839								0.397806
0.8	0.530962								0.396022
0.825	0.529907								0.394435
0.85	0.528697								0.393025
0.875	0.527352								0.391772
0.9	0.52589								0.390658
0.925	0.524327								0.389667
0.95	0.522677								0.388787
0.975	0.520953								0.388004
1	0.519166		0.429002	0.420577					0.387308		0.51324	0.521575
1.025	0.517326								0.38669
1.05	0.515441								0.38614
1.075	0.513519								0.385651
1.1	0.511568								0.385217
1.125	0.509592								0.384831
1.15	0.507598								0.384488
1.175	0.50559								0.384183
1.2	0.503573								0.383911
1.225	0.501549								0.38367
1.25	0.499523								0.383456
1.275	0.497496								0.383265
1.3	0.495473								0.383096
1.325	0.493454								0.382946
1.35	0.491442								0.382812
1.375	0.489438								0.382693
1.4	0.487445								0.382587
1.425	0.485462								0.382493
1.45	0.483492								0.38241
1.475	0.481535								0.382335
1.5	0.479592		0.41915	0.411247					0.382269		0.498937	0.499545
1.525	0.477664								0.382211
1.55	0.475751								0.382158
1.575	0.473854								0.382112
1.6	0.471973								0.382071
1.625	0.47011								0.382034
1.65	0.468263								0.382002
1.675	0.466433								0.381973
1.7	0.464621								0.381947
1.725	0.462826								0.381924
1.75	0.461049								0.381904
1.775	0.45929								0.381886
1.8	0.457549								0.38187
1.825	0.455825								0.381855
1.85	0.454119								0.381843
1.875	0.452431								0.381831
1.9	0.45076								0.381821
1.925	0.449108								0.381812
1.95	0.447472								0.381804
1.975	0.445855								0.381797
2	0.444254		0.403395	0.405128					0.381791		0.472801	0.473571
2.025	0.442671								0.381786
2.05	0.441105								0.381781
2.075	0.439556								0.381776
2.1	0.438024								0.381772
2.125	0.436508								0.381769
2.15	0.435009								0.381766
2.175	0.433527								0.381763
2.2	0.432061								0.381761
2.225	0.430611								0.381758
2.25	0.429177								0.381756
2.275	0.427758								0.381755
2.3	0.426356								0.381753
2.325	0.424969								0.381752
2.35	0.423597								0.381751
2.375	0.422241								0.38175
2.4	0.4209								0.381749
2.425	0.419573								0.381748
2.45	0.418261								0.381747
2.475	0.416964								0.381746
2.5	0.415682								0.381746
2.525	0.414413								0.381745
2.55	0.413159								0.381745
2.575	0.411919								0.381744
2.6	0.410693								0.381744
2.625	0.40948								0.381744
2.65	0.408281								0.381743
2.675	0.407095								0.381743
2.7	0.405922								0.381743
2.725	0.404763								0.381743
2.75	0.403616								0.381742
2.775	0.402483								0.381742
2.8	0.401362								0.381742
2.825	0.400253								0.381742
2.85	0.399157								0.381742
2.875	0.398073								0.381742
2.9	0.397001								0.381742
2.925	0.395941								0.381742
2.95	0.394894								0.381742
2.975	0.393857								0.381741
3	0.392833		0.370508	0.36789					0.381741		0.448633	0.445972
3.025	0.391819								0.381741
3.05	0.390818								0.381741
3.075	0.389827								0.381741
3.1	0.388847								0.381741
3.125	0.387879								0.381741
3.15	0.386921								0.381741
3.175	0.385974								0.381741
3.2	0.385037								0.381741
3.225	0.384111								0.381741
3.25	0.383196								0.381741
3.275	0.38229								0.381741
3.3	0.381395								0.381741
3.325	0.38051								0.381741
3.35	0.379634								0.381741
3.375	0.378769								0.381741
3.4	0.377913								0.381741
3.425	0.377067								0.381741
3.45	0.37623								0.381741
3.475	0.375402								0.381741
3.5	0.374584								0.381741
3.525	0.373775								0.381741
3.55	0.372975								0.381741
3.575	0.372184								0.381741
3.6	0.371402								0.381741
3.625	0.370628								0.381741
3.65	0.369863								0.381741
3.675	0.369107								0.381741
3.7	0.368359								0.381741
3.725	0.36762								0.381741
3.75	0.366889								0.381741
3.775	0.366166								0.381741
3.8	0.365451								0.381741
3.825	0.364744								0.381741
3.85	0.364045								0.381741
3.875	0.363354								0.381741
3.9	0.36267								0.381741
3.925	0.361994								0.381741
3.95	0.361326								0.381741
3.975	0.360665								0.381741
4	0.360012								0.381741
4.025	0.359366								0.381741
4.05	0.358727								0.381741
4.075	0.358095								0.381741
4.1	0.357471								0.381741
4.125	0.356853								0.381741
4.15	0.356242								0.381741
4.175	0.355638								0.381741
4.2	0.355041								0.381741
4.225	0.354451								0.381741
4.25	0.353867								0.381741
4.275	0.35329								0.381741
4.3	0.352719								0.381741
4.325	0.352154								0.381741
4.35	0.351596								0.381741
4.375	0.351044								0.381741
4.4	0.350498								0.381741
4.425	0.349959								0.381741
4.45	0.349425								0.381741
4.475	0.348898								0.381741
4.5	0.348376								0.381741
4.525	0.34786								0.381741
4.55	0.34735								0.381741
4.575	0.346845								0.381741
4.6	0.346347								0.381741
4.625	0.345853								0.381741
4.65	0.345366								0.381741
4.675	0.344884								0.381741
4.7	0.344407								0.381741
4.725	0.343935								0.381741
4.75	0.343469								0.381741
4.775	0.343008								0.381741
4.8	0.342552								0.381741
4.825	0.342101								0.381741
4.85	0.341656								0.381741
4.875	0.341215								0.381741
4.9	0.340779								0.381741
4.925	0.340348								0.381741
4.95	0.339922								0.381741
4.975	0.339501								0.381741
5	0.339084		0.315738	0.317542					0.381741		0.423865	0.413556
5.025	0.338672								0.381741
5.05	0.338265								0.381741
5.075	0.337862								0.381741
5.1	0.337464								0.381741
5.125	0.33707								0.381741
5.15	0.336681								0.381741
5.175	0.336296								0.381741
5.2	0.335915								0.381741
5.225	0.335538								0.381741
5.25	0.335166								0.381741
5.275	0.334798								0.381741
5.3	0.334434								0.381741
5.325	0.334074								0.381741
5.35	0.333718								0.381741
5.375	0.333366								0.381741
5.4	0.333018								0.381741
5.425	0.332674								0.381741
5.45	0.332334								0.381741
5.475	0.331997								0.381741
5.5	0.331665								0.381741
5.525	0.331336								0.381741
5.55	0.331011								0.381741
5.575	0.330689								0.381741
5.6	0.330371								0.381741
5.625	0.330056								0.381741
5.65	0.329745								0.381741
5.675	0.329438								0.381741
5.7	0.329134								0.381741
5.725	0.328833								0.381741
5.75	0.328536								0.381741
5.775	0.328242								0.381741
5.8	0.327951								0.381741
5.825	0.327664								0.381741
5.85	0.32738								0.381741
5.875	0.327099								0.381741
5.9	0.326821								0.381741
5.925	0.326546								0.381741
5.95	0.326274								0.381741
5.975	0.326006								0.381741
6	0.32574								0.381741
6.025	0.325478								0.381741
6.05	0.325218								0.381741
6.075	0.324961								0.381741
6.1	0.324707								0.381741
6.125	0.324456								0.381741
6.15	0.324208								0.381741
6.175	0.323962								0.381741
6.2	0.323719								0.381741
6.225	0.323479								0.381741
6.25	0.323242								0.381741
6.275	0.323007								0.381741
6.3	0.322775								0.381741
6.325	0.322546								0.381741
6.35	0.322319								0.381741
6.375	0.322094								0.381741
6.4	0.321872								0.381741
6.425	0.321653								0.381741
6.45	0.321436								0.381741
6.475	0.321221								0.381741
6.5	0.321009								0.381741
6.525	0.3208								0.381741
6.55	0.320592								0.381741
6.575	0.320387								0.381741
6.6	0.320184								0.381741
6.625	0.319984								0.381741
6.65	0.319785								0.381741
6.675	0.319589								0.381741
6.7	0.319396								0.381741
6.725	0.319204								0.381741
6.75	0.319014								0.381741
6.775	0.318827								0.381741
6.8	0.318642								0.381741
6.825	0.318458								0.381741
6.85	0.318277								0.381741
6.875	0.318098								0.381741
6.9	0.317921								0.381741
6.925	0.317746								0.381741
6.95	0.317572								0.381741
6.975	0.317401								0.381741
7	0.317232								0.381741
7.025	0.317064								0.381741
7.05	0.316899								0.381741
7.075	0.316735								0.381741
7.1	0.316573								0.381741
7.125	0.316413								0.381741
7.15	0.316254								0.381741
7.175	0.316098								0.381741
7.2	0.315943								0.381741
7.225	0.31579								0.381741
7.25	0.315639								0.381741
7.275	0.315489								0.381741
7.3	0.315341								0.381741
7.325	0.315195								0.381741
7.35	0.31505								0.381741
7.375	0.314907								0.381741
7.4	0.314765								0.381741
7.425	0.314625								0.381741
7.45	0.314487								0.381741
7.475	0.31435								0.381741
7.5	0.314215		0.268016	0.272184					0.381741		0.421677	0.400506
7.525	0.314081								0.381741
7.55	0.313949								0.381741
7.575	0.313818								0.381741
7.6	0.313689								0.381741
7.625	0.313561								0.381741
7.65	0.313435								0.381741
7.675	0.31331								0.381741
7.7	0.313186								0.381741
7.725	0.313064								0.381741
7.75	0.312943								0.381741
7.775	0.312824								0.381741
7.8	0.312705								0.381741
7.825	0.312588								0.381741
7.85	0.312473								0.381741
7.875	0.312359								0.381741
7.9	0.312246								0.381741
7.925	0.312134								0.381741
7.95	0.312024								0.381741
7.975	0.311914								0.381741
8	0.311806								0.381741
8.025	0.3117								0.381741
8.05	0.311594								0.381741
8.075	0.311489								0.381741
8.1	0.311386								0.381741
8.125	0.311284								0.381741
8.15	0.311183								0.381741
8.175	0.311083								0.381741
8.2	0.310985								0.381741
8.225	0.310887								0.381741
8.25	0.310791								0.381741
8.275	0.310695								0.381741
8.3	0.310601								0.381741
8.325	0.310507								0.381741
8.35	0.310415								0.381741
8.375	0.310324								0.381741
8.4	0.310234								0.381741
8.425	0.310145								0.381741
8.45	0.310056								0.381741
8.475	0.309969								0.381741
8.5	0.309883								0.381741
8.525	0.309798								0.381741
8.55	0.309713								0.381741
8.575	0.30963								0.381741
8.6	0.309547								0.381741
8.625	0.309466								0.381741
8.65	0.309385								0.381741
8.675	0.309306								0.381741
8.7	0.309227								0.381741
8.725	0.309149								0.381741
8.75	0.309072								0.381741
8.775	0.308996								0.381741
8.8	0.30892								0.381741
8.825	0.308846								0.381741
8.85	0.308772								0.381741
8.875	0.308699								0.381741
8.9	0.308627								0.381741
8.925	0.308556								0.381741
8.95	0.308485								0.381741
8.975	0.308416								0.381741
9	0.308347								0.381741
9.025	0.308279								0.381741
9.05	0.308212								0.381741
9.075	0.308145								0.381741
9.1	0.308079								0.381741
9.125	0.308014								0.381741
9.15	0.30795								0.381741
9.175	0.307886								0.381741
9.2	0.307823								0.381741
9.225	0.307761								0.381741
9.25	0.307699								0.381741
9.275	0.307638								0.381741
9.3	0.307578								0.381741
9.325	0.307519								0.381741
9.35	0.30746								0.381741
9.375	0.307402								0.381741
9.4	0.307344								0.381741
9.425	0.307287								0.381741
9.45	0.307231								0.381741
9.475	0.307176								0.381741
9.5	0.307121								0.381741
9.525	0.307066								0.381741
9.55	0.307012								0.381741
9.575	0.306959								0.381741
9.6	0.306907								0.381741
9.625	0.306855								0.381741
9.65	0.306803								0.381741
9.675	0.306752								0.381741
9.7	0.306702								0.381741
9.725	0.306653								0.381741
9.75	0.306603								0.381741
9.775	0.306555								0.381741
9.8	0.306509								0.381741
9.825	0.306463								0.381741
9.85	0.306417								0.381741
9.875	0.306371								0.381741
9.9	0.306325								0.381741
9.925	0.306279								0.381741
9.95	0.306233								0.381741
9.975	0.306187								0.381741
10	0.306141		0.257523	0.251744					0.381741		0.355936	0.380927

## Sheet: Fig. 2 - supp3d
time	S1 curve		S1-1 data	S1-2 data	S2 curve		S2-1 data	S2-2 data	S0 curve		S0-1 data	S0-2 data
0	0				0				1
0.025	0.041749		0.029314	0.037247	0.000111		0.000553	0.001222	0.958139		0.970834	0.964566
0.05	0.079507		0.061384	0.092078	0.000426		0	0.00046	0.920063		0.93857	0.911593
0.075	0.113636		0.1152	0.185535	0.000924		0.000198	0	0.885429		0.885397	0.818066
0.1	0.144467		0.138902	0.217966	0.001581		0	0.000647	0.853925		0.862201	0.786253
0.125	0.172301				0.00238				0.82527
0.15	0.197409				0.003303				0.799205
0.175	0.220042				0.004335				0.775496
0.2	0.240424		0.196211	0.323679	0.005461		0.000587	0.000541	0.753931		0.802901	0.680588
0.225	0.258762				0.006669				0.734315
0.25	0.275242				0.007947				0.716472
0.275	0.290034				0.009285				0.700242
0.3	0.303293		0.24632	0.371624	0.010673		0.001001	0.00372	0.68548		0.753132	0.62818
0.325	0.31516				0.012104				0.672052
0.35	0.325763				0.013569				0.659838
0.375	0.335217				0.015063				0.648728
0.4	0.343629				0.016577				0.638622
0.425	0.351095				0.018109				0.62943
0.45	0.357702				0.019651				0.621069
0.475	0.36353				0.021201				0.613464
0.5	0.368651		0.2785	0.410057	0.022754		0.005931	0.012015	0.606546		0.714146	0.58045
0.525	0.373131				0.024306				0.600253
0.55	0.37703				0.025855				0.59453
0.575	0.380401				0.027398				0.589324
0.6	0.383296				0.028932				0.584588
0.625	0.385758				0.030456				0.580281
0.65	0.387828				0.031966				0.576363
0.675	0.389544				0.033463				0.572799
0.7	0.390939				0.034944				0.569557
0.725	0.392045				0.036407				0.566608
0.75	0.392888				0.037853				0.563926
0.775	0.393495				0.03928				0.561487
0.8	0.393888				0.040687				0.559268
0.825	0.394089				0.042073				0.557249
0.85	0.394116				0.043439				0.555413
0.875	0.393987				0.044783				0.553743
0.9	0.393717				0.046106				0.552224
0.925	0.393322				0.047406				0.550842
0.95	0.392813				0.048684				0.549586
0.975	0.392202				0.04994				0.548442
1	0.391501		0.317118	0.425839	0.051174		0.031469	0.041543	0.547402		0.649991	0.532386
1.025	0.390719				0.052385				0.546457
1.05	0.389864				0.053573				0.545596
1.075	0.388946				0.05474				0.544814
1.1	0.38797				0.055884				0.544102
1.125	0.386945				0.057006				0.543454
1.15	0.385875				0.058106				0.542865
1.175	0.384766				0.059184				0.54233
1.2	0.383623				0.060241				0.541842
1.225	0.382451				0.061277				0.541399
1.25	0.381253				0.062292				0.540996
1.275	0.380034				0.063286				0.540629
1.3	0.378796				0.064259				0.540296
1.325	0.377543				0.065213				0.539992
1.35	0.376278				0.066146				0.539716
1.375	0.375002				0.06706				0.539465
1.4	0.373717				0.067955				0.539237
1.425	0.372427				0.068831				0.539029
1.45	0.371133				0.069688				0.53884
1.475	0.369837				0.070527				0.538668
1.5	0.368539		0.300932	0.430387	0.071348		0.042133	0.088391	0.538512		0.651503	0.467157
1.525	0.367241				0.072151				0.53837
1.55	0.365945				0.072937				0.538241
1.575	0.364652				0.073706				0.538123
1.6	0.363362				0.074459				0.538016
1.625	0.362076				0.075195				0.537919
1.65	0.360796				0.075915				0.53783
1.675	0.359522				0.076619				0.53775
1.7	0.358253				0.077307				0.537676
1.725	0.356992				0.077981				0.53761
1.75	0.355739				0.07864				0.537549
1.775	0.354493				0.079284				0.537494
1.8	0.353256				0.079914				0.537444
1.825	0.352028				0.08053				0.537398
1.85	0.350808				0.081133				0.537357
1.875	0.349598				0.081722				0.537319
1.9	0.348397				0.082298				0.537285
1.925	0.347205				0.082861				0.537253
1.95	0.346024				0.083411				0.537225
1.975	0.344852				0.08395				0.537199
2	0.34369		0.292125	0.404605	0.084476		0.059531	0.103849	0.537176		0.637383	0.469108
2.025	0.342539				0.084991				0.537154
2.05	0.341398				0.085494				0.537135
2.075	0.340267				0.085986				0.537117
2.1	0.339146				0.086467				0.537101
2.125	0.338036				0.086937				0.537087
2.15	0.336936				0.087396				0.537073
2.175	0.335846				0.087845				0.537061
2.2	0.334767				0.088284				0.53705
2.225	0.333698				0.088714				0.53704
2.25	0.33264				0.089133				0.537031
2.275	0.331591				0.089543				0.537023
2.3	0.330553				0.089944				0.537015
2.325	0.329525				0.090336				0.537008
2.35	0.328508				0.090719				0.537002
2.375	0.3275				0.091093				0.536996
2.4	0.326502				0.091459				0.536991
2.425	0.325515				0.091817				0.536987
2.45	0.324537				0.092166				0.536982
2.475	0.323569				0.092508				0.536978
2.5	0.322611				0.092842				0.536975
2.525	0.321663				0.093168				0.536972
2.55	0.320724				0.093487				0.536969
2.575	0.319795				0.093799				0.536966
2.6	0.318876				0.094103				0.536964
2.625	0.317965				0.094401				0.536961
2.65	0.317064				0.094692				0.536959
2.675	0.316173				0.094976				0.536958
2.7	0.31529				0.095254				0.536956
2.725	0.314417				0.095525				0.536954
2.75	0.313552				0.095791				0.536953
2.775	0.312697				0.09605				0.536952
2.8	0.31185				0.096303				0.536951
2.825	0.311012				0.096551				0.53695
2.85	0.310183				0.096793				0.536949
2.875	0.309362				0.097029				0.536948
2.9	0.30855				0.09726				0.536947
2.925	0.307746				0.097486				0.536946
2.95	0.30695				0.097707				0.536946
2.975	0.306163				0.097922				0.536945
3	0.305384		0.264416	0.363781	0.098133		0.079452	0.128622	0.536945		0.626659	0.450938
3.025	0.304613				0.098339				0.536944
3.05	0.30385				0.09854				0.536944
3.075	0.303095				0.098736				0.536943
3.1	0.302348				0.098928				0.536943
3.125	0.301609				0.099116				0.536943
3.15	0.300877				0.099299				0.536942
3.175	0.300153				0.099478				0.536942
3.2	0.299436				0.099653				0.536942
3.225	0.298727				0.099824				0.536942
3.25	0.298026				0.099991				0.536941
3.275	0.297331				0.100154				0.536941
3.3	0.296644				0.100313				0.536941
3.325	0.295964				0.100469				0.536941
3.35	0.295291				0.100621				0.536941
3.375	0.294625				0.100769				0.536941
3.4	0.293966				0.100914				0.53694
3.425	0.293314				0.101056				0.53694
3.45	0.292669				0.101195				0.53694
3.475	0.292031				0.10133				0.53694
3.5	0.291399				0.101462				0.53694
3.525	0.290774				0.101591				0.53694
3.55	0.290155				0.101717				0.53694
3.575	0.289543				0.101841				0.53694
3.6	0.288937				0.101961				0.53694
3.625	0.288337				0.102078				0.53694
3.65	0.287744				0.102193				0.53694
3.675	0.287157				0.102305				0.53694
3.7	0.286576				0.102415				0.53694
3.725	0.286001				0.102522				0.53694
3.75	0.285432				0.102626				0.53694
3.775	0.284869				0.102728				0.53694
3.8	0.284312				0.102828				0.53694
3.825	0.28376				0.102925				0.53694
3.85	0.283215				0.10302				0.53694
3.875	0.282675				0.103113				0.53694
3.9	0.282141				0.103204				0.536939
3.925	0.281612				0.103292				0.536939
3.95	0.281089				0.103378				0.536939
3.975	0.280572				0.103463				0.536939
4	0.280059				0.103545				0.536939
4.025	0.279552				0.103626				0.536939
4.05	0.279051				0.103704				0.536939
4.075	0.278555				0.103781				0.536939
4.1	0.278063				0.103856				0.536939
4.125	0.277577				0.103929				0.536939
4.15	0.277096				0.104001				0.536939
4.175	0.27662				0.10407				0.536939
4.2	0.276149				0.104138				0.536939
4.225	0.275683				0.104205				0.536939
4.25	0.275222				0.10427				0.536939
4.275	0.274766				0.104333				0.536939
4.3	0.274314				0.104395				0.536939
4.325	0.273867				0.104455				0.536939
4.35	0.273425				0.104514				0.536939
4.375	0.272988				0.104572				0.536939
4.4	0.272555				0.104628				0.536939
4.425	0.272126				0.104683				0.536939
4.45	0.271702				0.104736				0.536939
4.475	0.271282				0.104788				0.536939
4.5	0.270867				0.104839				0.536939
4.525	0.270456				0.104889				0.536939
4.55	0.27005				0.104938				0.536939
4.575	0.269647				0.104985				0.536939
4.6	0.269249				0.105031				0.536939
4.625	0.268855				0.105076				0.536939
4.65	0.268466				0.10512				0.536939
4.675	0.26808				0.105163				0.536939
4.7	0.267698				0.105205				0.536939
4.725	0.26732				0.105246				0.536939
4.75	0.266946				0.105286				0.536939
4.775	0.266576				0.105325				0.536939
4.8	0.26621				0.105363				0.536939
4.825	0.265848				0.1054				0.536939
4.85	0.26549				0.105436				0.536939
4.875	0.265135				0.105472				0.536939
4.9	0.264784				0.105506				0.536939
4.925	0.264437				0.10554				0.536939
4.95	0.264093				0.105572				0.536939
4.975	0.263753				0.105604				0.536939
5	0.263416		0.23949	0.320197	0.105635		0.090222	0.135331	0.536939		0.602841	0.420032
5.025	0.263083				0.105666				0.536939
5.05	0.262754				0.105695				0.536939
5.075	0.262427				0.105724				0.536939
5.1	0.262105				0.105752				0.536939
5.125	0.261785				0.10578				0.536939
5.15	0.261469				0.105807				0.536939
5.175	0.261157				0.105833				0.536939
5.2	0.260847				0.105858				0.536939
5.225	0.260541				0.105883				0.536939
5.25	0.260238				0.105907				0.536939
5.275	0.259938				0.105931				0.536939
5.3	0.259641				0.105954				0.536939
5.325	0.259348				0.105977				0.536939
5.35	0.259057				0.105998				0.536939
5.375	0.25877				0.10602				0.536939
5.4	0.258485				0.106041				0.536939
5.425	0.258204				0.106061				0.536939
5.45	0.257925				0.106081				0.536939
5.475	0.257649				0.1061				0.536939
5.5	0.257377				0.106119				0.536939
5.525	0.257107				0.106137				0.536939
5.55	0.256839				0.106155				0.536939
5.575	0.256575				0.106172				0.536939
5.6	0.256313				0.106189				0.536939
5.625	0.256055				0.106205				0.536939
5.65	0.255798				0.106221				0.536939
5.675	0.255545				0.106237				0.536939
5.7	0.255294				0.106252				0.536939
5.725	0.255046				0.106267				0.536939
5.75	0.2548				0.106281				0.536939
5.775	0.254557				0.106296				0.536939
5.8	0.254317				0.106309				0.536939
5.825	0.254079				0.106323				0.536939
5.85	0.253843				0.106336				0.536939
5.875	0.25361				0.106348				0.536939
5.9	0.25338				0.10636				0.536939
5.925	0.253151				0.106372				0.536939
5.95	0.252925				0.106384				0.536939
5.975	0.252702				0.106395				0.536939
6	0.252481				0.106406				0.536939
6.025	0.252262				0.106417				0.536939
6.05	0.252046				0.106428				0.536939
6.075	0.251831				0.106438				0.536939
6.1	0.251619				0.106448				0.536939
6.125	0.251409				0.106457				0.536939
6.15	0.251202				0.106467				0.536939
6.175	0.250996				0.106476				0.536939
6.2	0.250793				0.106485				0.536939
6.225	0.250592				0.106493				0.536939
6.25	0.250393				0.106501				0.536939
6.275	0.250196				0.10651				0.536939
6.3	0.250001				0.106518				0.536939
6.325	0.249808				0.106525				0.536939
6.35	0.249617				0.106533				0.536939
6.375	0.249428				0.10654				0.536939
6.4	0.249241				0.106547				0.536939
6.425	0.249056				0.106554				0.536939
6.45	0.248873				0.10656				0.536939
6.475	0.248692				0.106567				0.536939
6.5	0.248513				0.106573				0.536939
6.525	0.248335				0.106579				0.536939
6.55	0.24816				0.106585				0.536939
6.575	0.247986				0.106591				0.536939
6.6	0.247814				0.106596				0.536939
6.625	0.247644				0.106602				0.536939
6.65	0.247476				0.106607				0.536939
6.675	0.247309				0.106612				0.536939
6.7	0.247144				0.106617				0.536939
6.725	0.246981				0.106622				0.536939
6.75	0.24682				0.106627				0.536939
6.775	0.24666				0.106631				0.536939
6.8	0.246502				0.106635				0.536939
6.825	0.246346				0.10664				0.536939
6.85	0.246191				0.106644				0.536939
6.875	0.246038				0.106648				0.536939
6.9	0.245886				0.106652				0.536939
6.925	0.245736				0.106655				0.536939
6.95	0.245588				0.106659				0.536939
6.975	0.245441				0.106662				0.536939
7	0.245296				0.106666				0.536939
7.025	0.245152				0.106669				0.536939
7.05	0.24501				0.106672				0.536939
7.075	0.244869				0.106675				0.536939
7.1	0.24473				0.106678				0.536939
7.125	0.244592				0.106681				0.536939
7.15	0.244455				0.106684				0.536939
7.175	0.24432				0.106686				0.536939
7.2	0.244187				0.106689				0.536939
7.225	0.244055				0.106691				0.536939
7.25	0.243924				0.106694				0.536939
7.275	0.243794				0.106696				0.536939
7.3	0.243666				0.106698				0.536939
7.325	0.243539				0.1067				0.536939
7.35	0.243414				0.106703				0.536939
7.375	0.24329				0.106705				0.536939
7.4	0.243167				0.106706				0.536939
7.425	0.243046				0.106708				0.536939
7.45	0.242925				0.10671				0.536939
7.475	0.242806				0.106712				0.536939
7.5	0.242688		0.222772	0.271445	0.106713		0.093397	0.122401	0.536939		0.578807	0.424109
7.525	0.242572				0.106715				0.536939
7.55	0.242457				0.106716				0.536939
7.575	0.242342				0.106718				0.536939
7.6	0.242229				0.106719				0.536939
7.625	0.242118				0.106721				0.536939
7.65	0.242007				0.106722				0.536939
7.675	0.241898				0.106723				0.536939
7.7	0.241789				0.106724				0.536939
7.725	0.241682				0.106725				0.536939
7.75	0.241576				0.106726				0.536939
7.775	0.241471				0.106727				0.536939
7.8	0.241367				0.106728				0.536939
7.825	0.241265				0.106729				0.536939
7.85	0.241163				0.10673				0.536939
7.875	0.241062				0.106731				0.536939
7.9	0.240963				0.106732				0.536939
7.925	0.240864				0.106733				0.536939
7.95	0.240767				0.106733				0.536939
7.975	0.24067				0.106734				0.536939
8	0.240575				0.106735				0.536939
8.025	0.24048				0.106735				0.536939
8.05	0.240387				0.106736				0.536939
8.075	0.240294				0.106736				0.536939
8.1	0.240203				0.106737				0.536939
8.125	0.240112				0.106737				0.536939
8.15	0.240023				0.106738				0.536939
8.175	0.239934				0.106738				0.536939
8.2	0.239846				0.106738				0.536939
8.225	0.239759				0.106739				0.536939
8.25	0.239673				0.106739				0.536939
8.275	0.239588				0.106739				0.536939
8.3	0.239504				0.106739				0.536939
8.325	0.239421				0.10674				0.536939
8.35	0.239338				0.10674				0.536939
8.375	0.239257				0.10674				0.536939
8.4	0.239176				0.10674				0.536939
8.425	0.239096				0.10674				0.536939
8.45	0.239017				0.10674				0.536939
8.475	0.238939				0.10674				0.536939
8.5	0.238862				0.10674				0.536939
8.525	0.238785				0.10674				0.536939
8.55	0.238709				0.10674				0.536939
8.575	0.238634				0.10674				0.536939
8.6	0.23856				0.10674				0.536939
8.625	0.238487				0.10674				0.536939
8.65	0.238414				0.10674				0.536939
8.675	0.238342				0.10674				0.536939
8.7	0.238271				0.10674				0.536939
8.725	0.238201				0.10674				0.536939
8.75	0.238131				0.10674				0.536939
8.775	0.238062				0.10674				0.536939
8.8	0.237994				0.10674				0.536939
8.825	0.237926				0.10674				0.536939
8.85	0.237859				0.106739				0.536939
8.875	0.237793				0.106739				0.536939
8.9	0.237728				0.106739				0.536939
8.925	0.237663				0.106739				0.536939
8.95	0.237599				0.106739				0.536939
8.975	0.237536				0.106738				0.536939
9	0.237473				0.106738				0.536939
9.025	0.237411				0.106738				0.536939
9.05	0.23735				0.106738				0.536939
9.075	0.237289				0.106737				0.536939
9.1	0.237229				0.106737				0.536939
9.125	0.237169				0.106737				0.536939
9.15	0.23711				0.106736				0.536939
9.175	0.237052				0.106736				0.536939
9.2	0.236994				0.106736				0.536939
9.225	0.236937				0.106735				0.536939
9.25	0.236881				0.106735				0.536939
9.275	0.236825				0.106735				0.536939
9.3	0.23677				0.106734				0.536939
9.325	0.236715				0.106734				0.536939
9.35	0.236661				0.106734				0.536939
9.375	0.236607				0.106733				0.536939
9.4	0.236554				0.106733				0.536939
9.425	0.236502				0.106733				0.536939
9.45	0.23645				0.106732				0.536939
9.475	0.236398				0.106732				0.536939
9.5	0.236347				0.106731				0.536939
9.525	0.236297				0.106731				0.536939
9.55	0.236247				0.106731				0.536939
9.575	0.236198				0.10673				0.536939
9.6	0.236149				0.10673				0.536939
9.625	0.236101				0.10673				0.536939
9.65	0.236053				0.106729				0.536939
9.675	0.236006				0.106729				0.536939
9.7	0.235959				0.106728				0.536939
9.725	0.235913				0.106728				0.536939
9.75	0.235867				0.106727				0.536939
9.775	0.235822				0.106727				0.536939
9.8	0.235777				0.106727				0.536939
9.825	0.235733				0.106726				0.536939
9.85	0.235689				0.106726				0.536939
9.875	0.235645				0.106725				0.536939
9.9	0.235602				0.106725				0.536939
9.925	0.23556				0.106725				0.536939
9.95	0.235518				0.106724				0.536939
9.975	0.235476				0.106724				0.536939
10	0.235435		0.205063	0.247395	0.106723		0.083624	0.115001	0.536939		0.573089	0.431498

## Sheet: Fig. 2 - supp4b
time	S1 curve		S1-1 data	S1-2 data	S2 curve		S2-1 data	S2-2 data	S0 curve		S0-1 data	S0-2 data
0	0				0				1
0.025	0.001258		0.000801	0	0.000705		0.002319	0.001302	0.998009		0.998908	0.998847
0.05	0.001713		0.006425	0.000704	0.002078		0.003337	0.001219	0.996035		0.984971	0.979498
0.075	0.001873		0.006429	0.003997	0.003572		0.007119	0.004322	0.994079		0.976512	0.964726
0.1	0.001925		0.006043	0.003181	0.005		0.008684	0.005346	0.99214		0.979739	0.974544
0.125	0.001938				0.006306				0.990218
0.15	0.001936				0.00748				0.988313
0.175	0.001929				0.008527				0.986425
0.2	0.00192		0.004011	0.002837	0.009457		0.010135	0.008637	0.984553		0.983062	0.982667
0.225	0.00191				0.010281				0.982698
0.25	0.001901				0.011011				0.980859
0.275	0.001891				0.011657				0.979037
0.3	0.001881		0.004674	0.005384	0.012227		0.010242	0.011579	0.97723		0.978416	0.961591
0.325	0.001872				0.012729				0.97544
0.35	0.001862				0.013171				0.973665
0.375	0.001853				0.01356				0.971906
0.4	0.001843				0.0139				0.970162
0.425	0.001834				0.014197				0.968434
0.45	0.001825				0.014456				0.966721
0.475	0.001816				0.014681				0.965023
0.5	0.001807		0.005635	0.00613	0.014876		0.01027	0.014779	0.96334		0.968152	0.957939
0.525	0.001798				0.015043				0.961672
0.55	0.001789				0.015186				0.960018
0.575	0.00178				0.015307				0.95838
0.6	0.001771				0.01541				0.956755
0.625	0.001762				0.015495				0.955145
0.65	0.001754				0.015564				0.953549
0.675	0.001745				0.01562				0.951967
0.7	0.001737				0.015665				0.950399
0.725	0.001729				0.015698				0.948845
0.75	0.00172				0.015721				0.947305
0.775	0.001712				0.015737				0.945778
0.8	0.001704				0.015744				0.944264
0.825	0.001696				0.015745				0.942764
0.85	0.001688				0.01574				0.941277
0.875	0.00168				0.01573				0.939803
0.9	0.001672				0.015715				0.938343
0.925	0.001664				0.015696				0.936895
0.95	0.001657				0.015674				0.93546
0.975	0.001649				0.015648				0.934037
1	0.001641		0.00214	0.005631	0.01562		0.013077	0.020072	0.932627		0.941033	0.928991
1.025	0.001634				0.015589				0.93123
1.05	0.001626				0.015556				0.929844
1.075	0.001619				0.015521				0.928471
1.1	0.001612				0.015484				0.92711
1.125	0.001604				0.015446				0.925761
1.15	0.001597				0.015407				0.924424
1.175	0.00159				0.015367				0.923099
1.2	0.001583				0.015326				0.921785
1.225	0.001576				0.015284				0.920483
1.25	0.001569				0.015241				0.919193
1.275	0.001562				0.015199				0.917914
1.3	0.001555				0.015155				0.916646
1.325	0.001549				0.015112				0.915389
1.35	0.001542				0.015068				0.914143
1.375	0.001535				0.015024				0.912909
1.4	0.001529				0.014979				0.911685
1.425	0.001522				0.014935				0.910472
1.45	0.001516				0.014891				0.909269
1.475	0.001509				0.014847				0.908078
1.5	0.001503		0.003333	0.003722	0.014802		0.010756	0.019386	0.906896		0.925217	0.90721
1.525	0.001497				0.014758				0.905726
1.55	0.00149				0.014714				0.904565
1.575	0.001484				0.014671				0.903415
1.6	0.001478				0.014627				0.902275
1.625	0.001472				0.014584				0.901144
1.65	0.001466				0.014541				0.900024
1.675	0.00146				0.014498				0.898914
1.7	0.001454				0.014455				0.897813
1.725	0.001448				0.014413				0.896723
1.75	0.001442				0.01437				0.895641
1.775	0.001437				0.014329				0.89457
1.8	0.001431				0.014287				0.893508
1.825	0.001425				0.014246				0.892455
1.85	0.00142				0.014205				0.891411
1.875	0.001414				0.014164				0.890377
1.9	0.001409				0.014124				0.889351
1.925	0.001403				0.014084				0.888335
1.95	0.001398				0.014044				0.887328
1.975	0.001392				0.014004				0.886329
2	0.001387		0.003384	0.006545	0.013965		0.012374	0.014751	0.88534		0.903141	0.884234
2.025	0.001382				0.013926				0.884359
2.05	0.001377				0.013888				0.883387
2.075	0.001371				0.01385				0.882423
2.1	0.001366				0.013812				0.881468
2.125	0.001361				0.013774				0.880521
2.15	0.001356				0.013737				0.879582
2.175	0.001351				0.0137				0.878652
2.2	0.001346				0.013663				0.87773
2.225	0.001341				0.013627				0.876816
2.25	0.001336				0.013591				0.875911
2.275	0.001331				0.013555				0.875013
2.3	0.001327				0.01352				0.874123
2.325	0.001322				0.013485				0.873241
2.35	0.001317				0.01345				0.872366
2.375	0.001313				0.013416				0.8715
2.4	0.001308				0.013381				0.870641
2.425	0.001303				0.013348				0.869789
2.45	0.001299				0.013314				0.868946
2.475	0.001294				0.013281				0.868109
2.5	0.00129				0.013248				0.86728
2.525	0.001285				0.013215				0.866458
2.55	0.001281				0.013182				0.865644
2.575	0.001277				0.01315				0.864836
2.6	0.001272				0.013118				0.864036
2.625	0.001268				0.013087				0.863243
2.65	0.001264				0.013055				0.862457
2.675	0.00126				0.013024				0.861677
2.7	0.001256				0.012994				0.860905
2.725	0.001251				0.012963				0.860139
2.75	0.001247				0.012933				0.85938
2.775	0.001243				0.012903				0.858628
2.8	0.001239				0.012873				0.857883
2.825	0.001235				0.012844				0.857144
2.85	0.001231				0.012815				0.856411
2.875	0.001228				0.012786				0.855685
2.9	0.001224				0.012757				0.854966
2.925	0.00122				0.012728				0.854252
2.95	0.001216				0.0127				0.853545
2.975	0.001212				0.012672				0.852845
3	0.001208		0.003553	0.004648	0.012645		0.013275	0.013302	0.85215		0.874517	0.830866
3.025	0.001205				0.012617				0.851461
3.05	0.001201				0.01259				0.850779
3.075	0.001197				0.012563				0.850103
3.1	0.001194				0.012536				0.849432
3.125	0.00119				0.01251				0.848768
3.15	0.001187				0.012484				0.848109
3.175	0.001183				0.012458				0.847456
3.2	0.00118				0.012432				0.846809
3.225	0.001176				0.012406				0.846168
3.25	0.001173				0.012381				0.845532
3.275	0.00117				0.012356				0.844902
3.3	0.001166				0.012331				0.844277
3.325	0.001163				0.012306				0.843658
3.35	0.00116				0.012282				0.843044
3.375	0.001156				0.012257				0.842436
3.4	0.001153				0.012233				0.841833
3.425	0.00115				0.01221				0.841236
3.45	0.001147				0.012186				0.840643
3.475	0.001143				0.012163				0.840056
3.5	0.00114				0.012139				0.839474
3.525	0.001137				0.012116				0.838898
3.55	0.001134				0.012094				0.838326
3.575	0.001131				0.012071				0.837759
3.6	0.001128				0.012049				0.837197
3.625	0.001125				0.012026				0.836641
3.65	0.001122				0.012004				0.836089
3.675	0.001119				0.011983				0.835542
3.7	0.001116				0.011961				0.835
3.725	0.001113				0.01194				0.834462
3.75	0.00111				0.011918				0.83393
3.775	0.001108				0.011897				0.833402
3.8	0.001105				0.011876				0.832879
3.825	0.001102				0.011856				0.83236
3.85	0.001099				0.011835				0.831846
3.875	0.001097				0.011815				0.831336
3.9	0.001094				0.011795				0.830831
3.925	0.001091				0.011775				0.83033
3.95	0.001088				0.011755				0.829834
3.975	0.001086				0.011735				0.829342
4	0.001083				0.011716				0.828855
4.025	0.001081				0.011697				0.828372
4.05	0.001078				0.011678				0.827893
4.075	0.001075				0.011659				0.827418
4.1	0.001073				0.01164				0.826947
4.125	0.00107				0.011621				0.826481
4.15	0.001068				0.011603				0.826019
4.175	0.001065				0.011585				0.82556
4.2	0.001063				0.011567				0.825106
4.225	0.001061				0.011549				0.824656
4.25	0.001058				0.011531				0.82421
4.275	0.001056				0.011513				0.823767
4.3	0.001053				0.011496				0.823329
4.325	0.001051				0.011478				0.822895
4.35	0.001049				0.011461				0.822464
4.375	0.001047				0.011444				0.822037
4.4	0.001044				0.011427				0.821614
4.425	0.001042				0.011411				0.821194
4.45	0.00104				0.011394				0.820779
4.475	0.001038				0.011378				0.820367
4.5	0.001035				0.011361				0.819958
4.525	0.001033				0.011345				0.819553
4.55	0.001031				0.011329				0.819152
4.575	0.001029				0.011313				0.818754
4.6	0.001027				0.011298				0.81836
4.625	0.001025				0.011282				0.817969
4.65	0.001023				0.011267				0.817582
4.675	0.00102				0.011251				0.817198
4.7	0.001018				0.011236				0.816818
4.725	0.001016				0.011221				0.81644
4.75	0.001014				0.011206				0.816067
4.775	0.001012				0.011191				0.815696
4.8	0.00101				0.011177				0.815329
4.825	0.001008				0.011162				0.814965
4.85	0.001007				0.011148				0.814604
4.875	0.001005				0.011134				0.814246
4.9	0.001003				0.01112				0.813892
4.925	0.001001				0.011106				0.81354
4.95	0.000999				0.011092				0.813192
4.975	0.000997				0.011078				0.812847
5	0.000995		0	0.00531	0.011064		0.009983	0.01226	0.812505		0.847369	0.82081
5.025	0.000993				0.011051				0.812165
5.05	0.000992				0.011037				0.811829
5.075	0.00099				0.011024				0.811496
5.1	0.000988				0.011011				0.811166
5.125	0.000986				0.010998				0.810838
5.15	0.000985				0.010985				0.810514
5.175	0.000983				0.010972				0.810192
5.2	0.000981				0.010959				0.809874
5.225	0.000979				0.010947				0.809558
5.25	0.000978				0.010934				0.809244
5.275	0.000976				0.010922				0.808934
5.3	0.000974				0.01091				0.808626
5.325	0.000973				0.010897				0.808321
5.35	0.000971				0.010885				0.808019
5.375	0.00097				0.010873				0.807719
5.4	0.000968				0.010862				0.807422
5.425	0.000966				0.01085				0.807128
5.45	0.000965				0.010838				0.806836
5.475	0.000963				0.010827				0.806547
5.5	0.000962				0.010815				0.80626
5.525	0.00096				0.010804				0.805976
5.55	0.000959				0.010793				0.805694
5.575	0.000957				0.010782				0.805415
5.6	0.000956				0.010771				0.805139
5.625	0.000954				0.01076				0.804864
5.65	0.000953				0.010749				0.804592
5.675	0.000951				0.010738				0.804323
5.7	0.00095				0.010727				0.804056
5.725	0.000948				0.010717				0.803791
5.75	0.000947				0.010706				0.803529
5.775	0.000946				0.010696				0.803269
5.8	0.000944				0.010686				0.803011
5.825	0.000943				0.010676				0.802755
5.85	0.000941				0.010665				0.802502
5.875	0.00094				0.010655				0.802251
5.9	0.000939				0.010646				0.802002
5.925	0.000937				0.010636				0.801756
5.95	0.000936				0.010626				0.801511
5.975	0.000935				0.010616				0.801269
6	0.000934				0.010607				0.801029
6.025	0.000932				0.010597				0.800791
6.05	0.000931				0.010588				0.800555
6.075	0.00093				0.010579				0.800321
6.1	0.000928				0.010569				0.800089
6.125	0.000927				0.01056				0.799859
6.15	0.000926				0.010551				0.799632
6.175	0.000925				0.010542				0.799406
6.2	0.000924				0.010533				0.799182
6.225	0.000922				0.010524				0.79896
6.25	0.000921				0.010516				0.798741
6.275	0.00092				0.010507				0.798523
6.3	0.000919				0.010498				0.798307
6.325	0.000918				0.01049				0.798093
6.35	0.000917				0.010481				0.79788
6.375	0.000915				0.010473				0.79767
6.4	0.000914				0.010465				0.797462
6.425	0.000913				0.010456				0.797255
6.45	0.000912				0.010448				0.79705
6.475	0.000911				0.01044				0.796847
6.5	0.00091				0.010432				0.796646
6.525	0.000909				0.010424				0.796447
6.55	0.000908				0.010416				0.796249
6.575	0.000907				0.010408				0.796053
6.6	0.000906				0.010401				0.795859
6.625	0.000905				0.010393				0.795666
6.65	0.000904				0.010385				0.795475
6.675	0.000903				0.010378				0.795286
6.7	0.000902				0.01037				0.795099
6.725	0.000901				0.010363				0.794913
6.75	0.0009				0.010356				0.794729
6.775	0.000899				0.010348				0.794546
6.8	0.000898				0.010341				0.794365
6.825	0.000897				0.010334				0.794186
6.85	0.000896				0.010327				0.794008
6.875	0.000895				0.01032				0.793832
6.9	0.000894				0.010313				0.793658
6.925	0.000893				0.010306				0.793484
6.95	0.000892				0.010299				0.793313
6.975	0.000891				0.010292				0.793143
7	0.00089				0.010286				0.792974
7.025	0.000889				0.010279				0.792807
7.05	0.000888				0.010272				0.792642
7.075	0.000888				0.010266				0.792477
7.1	0.000887				0.010259				0.792315
7.125	0.000886				0.010253				0.792153
7.15	0.000885				0.010247				0.791994
7.175	0.000884				0.01024				0.791835
7.2	0.000883				0.010234				0.791678
7.225	0.000882				0.010228				0.791522
7.25	0.000882				0.010222				0.791368
7.275	0.000881				0.010216				0.791215
7.3	0.00088				0.010209				0.791064
7.325	0.000879				0.010203				0.790913
7.35	0.000878				0.010198				0.790764
7.375	0.000878				0.010192				0.790617
7.4	0.000877				0.010186				0.790471
7.425	0.000876				0.01018				0.790325
7.45	0.000875				0.010174				0.790182
7.475	0.000874				0.010169				0.790039
7.5	0.000874		0.002115	0.003695	0.010163		0.009949	0.01076	0.789898		0.835323	0.79315
7.525	0.000873				0.010157				0.789758
7.55	0.000872				0.010152				0.789619
7.575	0.000871				0.010146				0.789482
7.6	0.000871				0.010141				0.789345
7.625	0.00087				0.010136				0.78921
7.65	0.000869				0.01013				0.789076
7.675	0.000869				0.010125				0.788944
7.7	0.000868				0.01012				0.788812
7.725	0.000867				0.010115				0.788682
7.75	0.000866				0.010109				0.788552
7.775	0.000866				0.010104				0.788424
7.8	0.000865				0.010099				0.788297
7.825	0.000864				0.010094				0.788171
7.85	0.000864				0.010089				0.788047
7.875	0.000863				0.010084				0.787923
7.9	0.000862				0.010079				0.7878
7.925	0.000862				0.010075				0.787679
7.95	0.000861				0.01007				0.787559
7.975	0.00086				0.010065				0.787439
8	0.00086				0.01006				0.787321
8.025	0.000859				0.010056				0.787204
8.05	0.000859				0.010051				0.787087
8.075	0.000858				0.010046				0.786972
8.1	0.000857				0.010042				0.786858
8.125	0.000857				0.010037				0.786745
8.15	0.000856				0.010033				0.786633
8.175	0.000855				0.010028				0.786521
8.2	0.000855				0.010024				0.786411
8.225	0.000854				0.01002				0.786302
8.25	0.000854				0.010015				0.786194
8.275	0.000853				0.010011				0.786086
8.3	0.000853				0.010007				0.78598
8.325	0.000852				0.010003				0.785874
8.35	0.000851				0.009998				0.78577
8.375	0.000851				0.009994				0.785666
8.4	0.00085				0.00999				0.785564
8.425	0.00085				0.009986				0.785462
8.45	0.000849				0.009982				0.785361
8.475	0.000849				0.009978				0.785261
8.5	0.000848				0.009974				0.785162
8.525	0.000848				0.00997				0.785064
8.55	0.000847				0.009966				0.784966
8.575	0.000847				0.009963				0.78487
8.6	0.000846				0.009959				0.784774
8.625	0.000846				0.009955				0.784679
8.65	0.000845				0.009951				0.784585
8.675	0.000845				0.009947				0.784492
8.7	0.000844				0.009944				0.7844
8.725	0.000844				0.00994				0.784308
8.75	0.000843				0.009937				0.784217
8.775	0.000843				0.009933				0.784127
8.8	0.000842				0.009929				0.784038
8.825	0.000842				0.009926				0.78395
8.85	0.000841				0.009922				0.783862
8.875	0.000841				0.009919				0.783776
8.9	0.00084				0.009915				0.78369
8.925	0.00084				0.009912				0.783604
8.95	0.000839				0.009909				0.78352
8.975	0.000839				0.009905				0.783436
9	0.000838				0.009902				0.783353
9.025	0.000838				0.009899				0.783271
9.05	0.000838				0.009896				0.783189
9.075	0.000837				0.009892				0.783108
9.1	0.000837				0.009889				0.783028
9.125	0.000836				0.009886				0.782949
9.15	0.000836				0.009883				0.78287
9.175	0.000835				0.00988				0.782792
9.2	0.000835				0.009877				0.782714
9.225	0.000835				0.009874				0.782638
9.25	0.000834				0.009871				0.782562
9.275	0.000834				0.009868				0.782486
9.3	0.000833				0.009865				0.782412
9.325	0.000833				0.009862				0.782338
9.35	0.000833				0.009859				0.782264
9.375	0.000832				0.009856				0.782192
9.4	0.000832				0.009853				0.78212
9.425	0.000831				0.00985				0.782048
9.45	0.000831				0.009847				0.781977
9.475	0.000831				0.009844				0.781907
9.5	0.00083				0.009842				0.781838
9.525	0.00083				0.009839				0.781769
9.55	0.00083				0.009836				0.7817
9.575	0.000829				0.009833				0.781633
9.6	0.000829				0.009831				0.781565
9.625	0.000828				0.009828				0.781499
9.65	0.000828				0.009826				0.781433
9.675	0.000828				0.009823				0.781367
9.7	0.000827				0.00982				0.781303
9.725	0.000827				0.009818				0.781238
9.75	0.000827				0.009815				0.781175
9.775	0.000826				0.009813				0.781113
9.8	0.000826				0.00981				0.781053
9.825	0.000826				0.009808				0.780992
9.85	0.000825				0.009806				0.780932
9.875	0.000825				0.009803				0.780871
9.9	0.000825				0.009801				0.78081
9.925	0.000824				0.009798				0.78075
9.95	0.000824				0.009796				0.780689
9.975	0.000824				0.009793				0.780629
10	0.000823		0	5.25e-05	0.009791		0.010425	0.01222	0.780568		0.813294	0.723605

## Sheet: Fig. 2 - supp4d
time					S2 curve		S2-1 data	S2-2 data	S1 curve		S1-1 data	S1-2 data
0					0				1
0.01					0.177677		0.207259	0.198919	0.822323		0.792741	0.801081
0.02					0.291685		0.322048	0.281805	0.708315		0.677952	0.718195
0.03					0.364839				0.635161
0.04					0.411779		0.390375	0.340816	0.588221		0.609625	0.659184
0.05					0.441898				0.558102
0.06					0.461224		0.426228	0.384843	0.538776		0.573772	0.615157
0.07					0.473625				0.526375
0.08					0.481582		0.451772	0.406809	0.518418		0.548228	0.593191
0.09					0.486688				0.513312
0.1					0.489964		0.454135	0.41858	0.510036		0.545865	0.58142
0.11					0.492066				0.507934
0.12					0.493415				0.506585
0.13					0.494281				0.505719
0.14					0.494836				0.505164
0.15					0.495192				0.504808
0.16					0.495421				0.504579
0.17					0.495568				0.504432
0.18					0.495662				0.504338
0.19					0.495722				0.504278
0.2					0.495761				0.504239
0.21					0.495786				0.504214
0.22					0.495802				0.504198
0.23					0.495812				0.504188
0.24					0.495819				0.504181
0.25					0.495823				0.504177
0.26					0.495826				0.504174
0.27					0.495827				0.504173
0.28					0.495829				0.504171
0.29					0.495829				0.504171
0.3					0.49583		0.475266	0.432506	0.50417		0.524734	0.567494
0.31					0.49583				0.50417
0.32					0.49583				0.50417
0.33					0.49583				0.50417
0.34					0.49583				0.50417
0.35					0.49583				0.50417
0.36					0.49583				0.50417
0.37					0.49583				0.50417
0.38					0.49583				0.50417
0.39					0.495831				0.504169
0.4					0.495831				0.504169
0.41					0.495831				0.504169
0.42					0.495831				0.504169
0.43					0.495831				0.504169
0.44					0.495831				0.504169
0.45					0.495831				0.504169
0.46					0.495831				0.504169
0.47					0.495831				0.504169
0.48					0.495831				0.504169
0.49					0.495831				0.504169
0.5					0.495831		0.477807	0.437838	0.504169		0.522193	0.562162
0.51					0.495831				0.504169
0.52					0.495831				0.504169
0.53					0.495831				0.504169
0.54					0.495831				0.504169
0.55					0.495831				0.504169
0.56					0.495831				0.504169
0.57					0.495831				0.504169
0.58					0.495831				0.504169
0.59					0.495831				0.504169
0.6					0.495831				0.504169
0.61					0.495831				0.504169
0.62					0.495831				0.504169
0.63					0.495831				0.504169
0.64					0.495831				0.504169
0.65					0.495831				0.504169
0.66					0.495831				0.504169
0.67					0.495831				0.504169
0.68					0.495831				0.504169
0.69					0.495831				0.504169
0.7					0.495831				0.504169
0.71					0.495831				0.504169
0.72					0.495831				0.504169
0.73					0.495831				0.504169
0.74					0.495831				0.504169
0.75					0.495831				0.504169
0.76					0.495831				0.504169
0.77					0.495831				0.504169
0.78					0.495831				0.504169
0.79					0.495831				0.504169
0.8					0.495831				0.504169
0.81					0.495831				0.504169
0.82					0.495831				0.504169
0.83					0.495831				0.504169
0.84					0.495831				0.504169
0.85					0.495831				0.504169
0.86					0.495831				0.504169
0.87					0.495831				0.504169
0.88					0.495831				0.504169
0.89					0.495831				0.504169
0.9					0.495831				0.504169
0.91					0.495831				0.504169
0.92					0.495831				0.504169
0.93					0.495831				0.504169
0.94					0.495831				0.504169
0.95					0.495831				0.504169
0.96					0.495831				0.504169
0.97					0.495831				0.504169
0.98					0.495831				0.504169
0.99					0.495831				0.504169
1					0.495831		0.489439	0.446113	0.504169		0.510561	0.553887
1.01					0.495831				0.504169
1.02					0.495831				0.504169
1.03					0.495831				0.504169
1.04					0.495831				0.504169
1.05					0.495831				0.504169
1.06					0.495831				0.504169
1.07					0.495831				0.504169
1.08					0.495831				0.504169
1.09					0.495831				0.504169
1.1					0.495831				0.504169
1.11					0.495831				0.504169
1.12					0.495831				0.504169
1.13					0.495831				0.504169
1.14					0.495831				0.504169
1.15					0.495831				0.504169
1.16					0.495831				0.504169
1.17					0.495831				0.504169
1.18					0.495831				0.504169
1.19					0.495831				0.504169
1.2					0.495831				0.504169
1.21					0.495831				0.504169
1.22					0.495831				0.504169
1.23					0.495831				0.504169
1.24					0.495831				0.504169
1.25					0.495831				0.504169
1.26					0.495831				0.504169
1.27					0.495831				0.504169
1.28					0.495831				0.504169
1.29					0.495831				0.504169
1.3					0.495831				0.504169
1.31					0.495831				0.504169
1.32					0.495831				0.504169
1.33					0.495831				0.504169
1.34					0.495831				0.504169
1.35					0.495831				0.504169
1.36					0.495831				0.504169
1.37					0.495831				0.504169
1.38					0.495831				0.504169
1.39					0.495831				0.504169
1.4					0.495831				0.504169
1.41					0.495831				0.504169
1.42					0.495831				0.504169
1.43					0.495831				0.504169
1.44					0.495831				0.504169
1.45					0.495831				0.504169
1.46					0.495831				0.504169
1.47					0.495831				0.504169
1.48					0.495831				0.504169
1.49					0.495831				0.504169
1.5					0.495831				0.504169
1.51					0.495831				0.504169
1.52					0.495831				0.504169
1.53					0.495831				0.504169
1.54					0.495831				0.504169
1.55					0.495831				0.504169
1.56					0.495831				0.504169
1.57					0.495831				0.504169
1.58					0.495831				0.504169
1.59					0.495831				0.504169
1.6					0.495831				0.504169
1.61					0.495831				0.504169
1.62					0.495831				0.504169
1.63					0.495831				0.504169
1.64					0.495831				0.504169
1.65					0.495831				0.504169
1.66					0.495831				0.504169
1.67					0.495831				0.504169
1.68					0.495831				0.504169
1.69					0.495831				0.504169
1.7					0.495831				0.504169
1.71					0.495831				0.504169
1.72					0.495831				0.504169
1.73					0.495831				0.504169
1.74					0.495831				0.504169
1.75					0.495831				0.504169
1.76					0.495831				0.504169
1.77					0.495831				0.504169
1.78					0.495831				0.504169
1.79					0.495831				0.504169
1.8					0.495831				0.504169
1.81					0.495831				0.504169
1.82					0.495831				0.504169
1.83					0.495831				0.504169
1.84					0.495831				0.504169
1.85					0.495831				0.504169
1.86					0.495831				0.504169
1.87					0.495831				0.504169
1.88					0.495831				0.504169
1.89					0.495831				0.504169
1.9					0.495831				0.504169
1.91					0.495831				0.504169
1.92					0.495831				0.504169
1.93					0.495831				0.504169
1.94					0.495831				0.504169
1.95					0.495831				0.504169
1.96					0.495831				0.504169
1.97					0.495831				0.504169
1.98					0.495831				0.504169
1.99					0.495831				0.504169
2					0.495831				0.504169
2.01					0.495831				0.504169
2.02					0.495831				0.504169
2.03					0.495831				0.504169
2.04					0.495831				0.504169
2.05					0.495831				0.504169
2.06					0.495831				0.504169
2.07					0.495831				0.504169
2.08					0.495831				0.504169
2.09					0.495831				0.504169
2.1					0.495831				0.504169
2.11					0.495831				0.504169
2.12					0.495831				0.504169
2.13					0.495831				0.504169
2.14					0.495831				0.504169
2.15					0.495831				0.504169
2.16					0.495831				0.504169
2.17					0.495831				0.504169
2.18					0.495831				0.504169
2.19					0.495831				0.504169
2.2					0.495831				0.504169
2.21					0.495831				0.504169
2.22					0.495831				0.504169
2.23					0.495831				0.504169
2.24					0.495831				0.504169
2.25					0.495831				0.504169
2.26					0.495831				0.504169
2.27					0.495831				0.504169
2.28					0.495831				0.504169
2.29					0.495831				0.504169
2.3					0.495831				0.504169
2.31					0.495831				0.504169
2.32					0.495831				0.504169
2.33					0.495831				0.504169
2.34					0.495831				0.504169
2.35					0.495831				0.504169
2.36					0.495831				0.504169
2.37					0.495831				0.504169
2.38					0.495831				0.504169
2.39					0.495831				0.504169
2.4					0.495831				0.504169
2.41					0.495831				0.504169
2.42					0.495831				0.504169
2.43					0.495831				0.504169
2.44					0.495831				0.504169
2.45					0.495831				0.504169
2.46					0.495831				0.504169
2.47					0.495831				0.504169
2.48					0.495831				0.504169
2.49					0.495831				0.504169
2.5					0.495831				0.504169
2.51					0.495831				0.504169
2.52					0.495831				0.504169
2.53					0.495831				0.504169
2.54					0.495831				0.504169
2.55					0.495831				0.504169
2.56					0.495831				0.504169
2.57					0.495831				0.504169
2.58					0.495831				0.504169
2.59					0.495831				0.504169
2.6					0.495831				0.504169
2.61					0.495831				0.504169
2.62					0.495831				0.504169
2.63					0.495831				0.504169
2.64					0.495831				0.504169
2.65					0.495831				0.504169
2.66					0.495831				0.504169
2.67					0.495831				0.504169
2.68					0.495831				0.504169
2.69					0.495831				0.504169
2.7					0.495831				0.504169
2.71					0.495831				0.504169
2.72					0.495831				0.504169
2.73					0.495831				0.504169
2.74					0.495831				0.504169
2.75					0.495831				0.504169
2.76					0.495831				0.504169
2.77					0.495831				0.504169
2.78					0.495831				0.504169
2.79					0.495831				0.504169
2.8					0.495831				0.504169
2.81					0.495831				0.504169
2.82					0.495831				0.504169
2.83					0.495831				0.504169
2.84					0.495831				0.504169
2.85					0.495831				0.504169
2.86					0.495831				0.504169
2.87					0.495831				0.504169
2.88					0.495831				0.504169
2.89					0.495831				0.504169
2.9					0.495831				0.504169
2.91					0.495831				0.504169
2.92					0.495831				0.504169
2.93					0.495831				0.504169
2.94					0.495831				0.504169
2.95					0.495831				0.504169
2.96					0.495831				0.504169
2.97					0.495831				0.504169
2.98					0.495831				0.504169
2.99					0.495831				0.504169
3					0.495831		0.496839	0.449117	0.504169		0.503161	0.550883
3.01					0.495831				0.504169
3.02					0.495831				0.504169
3.03					0.495831				0.504169
3.04					0.495831				0.504169
3.05					0.495831				0.504169
3.06					0.495831				0.504169
3.07					0.495831				0.504169
3.08					0.495831				0.504169
3.09					0.495831				0.504169
3.1					0.495831				0.504169
3.11					0.495831				0.504169
3.12					0.495831				0.504169
3.13					0.495831				0.504169
3.14					0.495831				0.504169
3.15					0.495831				0.504169
3.16					0.495831				0.504169
3.17					0.495831				0.504169
3.18					0.495831				0.504169
3.19					0.495831				0.504169
3.2					0.495831				0.504169
3.21					0.495831				0.504169
3.22					0.495831				0.504169
3.23					0.495831				0.504169
3.24					0.495831				0.504169
3.25					0.495831				0.504169
3.26					0.495831				0.504169
3.27					0.495831				0.504169
3.28					0.495831				0.504169
3.29					0.495831				0.504169
3.3					0.495831				0.504169
3.31					0.495831				0.504169
3.32					0.495831				0.504169
3.33					0.495831				0.504169
3.34					0.495831				0.504169
3.35					0.495831				0.504169
3.36					0.495831				0.504169
3.37					0.495831				0.504169
3.38					0.495831				0.504169
3.39					0.495831				0.504169
3.4					0.495831				0.504169
3.41					0.495831				0.504169
3.42					0.495831				0.504169
3.43					0.495831				0.504169
3.44					0.495831				0.504169
3.45					0.495831				0.504169
3.46					0.495831				0.504169
3.47					0.495831				0.504169
3.48					0.495831				0.504169
3.49					0.495831				0.504169
3.5					0.495831				0.504169
3.51					0.495831				0.504169
3.52					0.495831				0.504169
3.53					0.495831				0.504169
3.54					0.495831				0.504169
3.55					0.495831				0.504169
3.56					0.495831				0.504169
3.57					0.495831				0.504169
3.58					0.495831				0.504169
3.59					0.495831				0.504169
3.6					0.495831				0.504169
3.61					0.495831				0.504169
3.62					0.495831				0.504169
3.63					0.495831				0.504169
3.64					0.495831				0.504169
3.65					0.495831				0.504169
3.66					0.495831				0.504169
3.67					0.495831				0.504169
3.68					0.495831				0.504169
3.69					0.495831				0.504169
3.7					0.495831				0.504169
3.71					0.495831				0.504169
3.72					0.495831				0.504169
3.73					0.495831				0.504169
3.74					0.495831				0.504169
3.75					0.495831				0.504169
3.76					0.495831				0.504169
3.77					0.495831				0.504169
3.78					0.495831				0.504169
3.79					0.495831				0.504169
3.8					0.495831				0.504169
3.81					0.495831				0.504169
3.82					0.495831				0.504169
3.83					0.495831				0.504169
3.84					0.495831				0.504169
3.85					0.495831				0.504169
3.86					0.495831				0.504169
3.87					0.495831				0.504169
3.88					0.495831				0.504169
3.89					0.495831				0.504169
3.9					0.495831				0.504169
3.91					0.495831				0.504169
3.92					0.495831				0.504169
3.93					0.495831				0.504169
3.94					0.495831				0.504169
3.95					0.495831				0.504169
3.96					0.495831				0.504169
3.97					0.495831				0.504169
3.98					0.495831				0.504169
3.99					0.495831				0.504169
4					0.495831				0.504169
4.01					0.495831				0.504169
4.02					0.495831				0.504169
4.03					0.495831				0.504169
4.04					0.495831				0.504169
4.05					0.495831				0.504169
4.06					0.495831				0.504169
4.07					0.495831				0.504169
4.08					0.495831				0.504169
4.09					0.495831				0.504169
4.1					0.495831				0.504169
4.11					0.495831				0.504169
4.12					0.495831				0.504169
4.13					0.495831				0.504169
4.14					0.495831				0.504169
4.15					0.495831				0.504169
4.16					0.495831				0.504169
4.17					0.495831				0.504169
4.18					0.495831				0.504169
4.19					0.495831				0.504169
4.2					0.495831				0.504169
4.21					0.495831				0.504169
4.22					0.495831				0.504169
4.23					0.495831				0.504169
4.24					0.495831				0.504169
4.25					0.495831				0.504169
4.26					0.495831				0.504169
4.27					0.495831				0.504169
4.28					0.495831				0.504169
4.29					0.495831				0.504169
4.3					0.495831				0.504169
4.31					0.495831				0.504169
4.32					0.495831				0.504169
4.33					0.495831				0.504169
4.34					0.495831				0.504169
4.35					0.495831				0.504169
4.36					0.495831				0.504169
4.37					0.495831				0.504169
4.38					0.495831				0.504169
4.39					0.495831				0.504169
4.4					0.495831				0.504169
4.41					0.495831				0.504169
4.42					0.495831				0.504169
4.43					0.495831				0.504169
4.44					0.495831				0.504169
4.45					0.495831				0.504169
4.46					0.495831				0.504169
4.47					0.495831				0.504169
4.48					0.495831				0.504169
4.49					0.495831				0.504169
4.5					0.495831				0.504169
4.51					0.495831				0.504169
4.52					0.495831				0.504169
4.53					0.495831				0.504169
4.54					0.495831				0.504169
4.55					0.495831				0.504169
4.56					0.495831				0.504169
4.57					0.495831				0.504169
4.58					0.495831				0.504169
4.59					0.495831				0.504169
4.6					0.495831				0.504169
4.61					0.495831				0.504169
4.62					0.495831				0.504169
4.63					0.495831				0.504169
4.64					0.495831				0.504169
4.65					0.495831				0.504169
4.66					0.495831				0.504169
4.67					0.495831				0.504169
4.68					0.495831				0.504169
4.69					0.495831				0.504169
4.7					0.495831				0.504169
4.71					0.495831				0.504169
4.72					0.495831				0.504169
4.73					0.495831				0.504169
4.74					0.495831				0.504169
4.75					0.495831				0.504169
4.76					0.495831				0.504169
4.77					0.495831				0.504169
4.78					0.495831				0.504169
4.79					0.495831				0.504169
4.8					0.495831				0.504169
4.81					0.495831				0.504169
4.82					0.495831				0.504169
4.83					0.495831				0.504169
4.84					0.495831				0.504169
4.85					0.495831				0.504169
4.86					0.495831				0.504169
4.87					0.495831				0.504169
4.88					0.495831				0.504169
4.89					0.495831				0.504169
4.9					0.495831				0.504169
4.91					0.495831				0.504169
4.92					0.495831				0.504169
4.93					0.495831				0.504169
4.94					0.495831				0.504169
4.95					0.495831				0.504169
4.96					0.495831				0.504169
4.97					0.495831				0.504169
4.98					0.495831				0.504169
4.99					0.495831				0.504169
5					0.495831		0.502213	0.456052	0.504169		0.497787	0.543948
5.01					0.495831				0.504169
5.02					0.495831				0.504169
5.03					0.495831				0.504169
5.04					0.495831				0.504169
5.05					0.495831				0.504169
5.06					0.495831				0.504169
5.07					0.495831				0.504169
5.08					0.495831				0.504169
5.09					0.495831				0.504169
5.1					0.495831				0.504169
5.11					0.495831				0.504169
5.12					0.495831				0.504169
5.13					0.495831				0.504169
5.14					0.495831				0.504169
5.15					0.495831				0.504169
5.16					0.495831				0.504169
5.17					0.495831				0.504169
5.18					0.495831				0.504169
5.19					0.495831				0.504169
5.2					0.495831				0.504169
5.21					0.495831				0.504169
5.22					0.495831				0.504169
5.23					0.495831				0.504169
5.24					0.495831				0.504169
5.25					0.495831				0.504169
5.26					0.495831				0.504169
5.27					0.495831				0.504169
5.28					0.495831				0.504169
5.29					0.495831				0.504169
5.3					0.495831				0.504169
5.31					0.495831				0.504169
5.32					0.495831				0.504169
5.33					0.495831				0.504169
5.34					0.495831				0.504169
5.35					0.495831				0.504169
5.36					0.495831				0.504169
5.37					0.495831				0.504169
5.38					0.495831				0.504169
5.39					0.495831				0.504169
5.4					0.495831				0.504169
5.41					0.495831				0.504169
5.42					0.495831				0.504169
5.43					0.495831				0.504169
5.44					0.495831				0.504169
5.45					0.495831				0.504169
5.46					0.495831				0.504169
5.47					0.495831				0.504169
5.48					0.495831				0.504169
5.49					0.495831				0.504169
5.5					0.495831				0.504169
5.51					0.495831				0.504169
5.52					0.495831				0.504169
5.53					0.495831				0.504169
5.54					0.495831				0.504169
5.55					0.495831				0.504169
5.56					0.495831				0.504169
5.57					0.495831				0.504169
5.58					0.495831				0.504169
5.59					0.495831				0.504169
5.6					0.495831				0.504169
5.61					0.495831				0.504169
5.62					0.495831				0.504169
5.63					0.495831				0.504169
5.64					0.495831				0.504169
5.65					0.495831				0.504169
5.66					0.495831				0.504169
5.67					0.495831				0.504169
5.68					0.495831				0.504169
5.69					0.495831				0.504169
5.7					0.495831				0.504169
5.71					0.495831				0.504169
5.72					0.495831				0.504169
5.73					0.495831				0.504169
5.74					0.495831				0.504169
5.75					0.495831				0.504169
5.76					0.495831				0.504169
5.77					0.495831				0.504169
5.78					0.495831				0.504169
5.79					0.495831				0.504169
5.8					0.495831				0.504169
5.81					0.495831				0.504169
5.82					0.495831				0.504169
5.83					0.495831				0.504169
5.84					0.495831				0.504169
5.85					0.495831				0.504169
5.86					0.495831				0.504169
5.87					0.495831				0.504169
5.88					0.495831				0.504169
5.89					0.495831				0.504169
5.9					0.495831				0.504169
5.91					0.495831				0.504169
5.92					0.495831				0.504169
5.93					0.495831				0.504169
5.94					0.495831				0.504169
5.95					0.495831				0.504169
5.96					0.495831				0.504169
5.97					0.495831				0.504169
5.98					0.495831				0.504169
5.99					0.495831				0.504169
6					0.495831				0.504169
6.01					0.495831				0.504169
6.02					0.495831				0.504169
6.03					0.495831				0.504169
6.04					0.495831				0.504169
6.05					0.495831				0.504169
6.06					0.495831				0.504169
6.07					0.495831				0.504169
6.08					0.495831				0.504169
6.09					0.495831				0.504169
6.1					0.495831				0.504169
6.11					0.495831				0.504169
6.12					0.495831				0.504169
6.13					0.495831				0.504169
6.14					0.495831				0.504169
6.15					0.495831				0.504169
6.16					0.495831				0.504169
6.17					0.495831				0.504169
6.18					0.495831				0.504169
6.19					0.495831				0.504169
6.2					0.495831				0.504169
6.21					0.495831				0.504169
6.22					0.495831				0.504169
6.23					0.495831				0.504169
6.24					0.495831				0.504169
6.25					0.495831				0.504169
6.26					0.495831				0.504169
6.27					0.495831				0.504169
6.28					0.495831				0.504169
6.29					0.495831				0.504169
6.3					0.495831				0.504169
6.31					0.495831				0.504169
6.32					0.495831				0.504169
6.33					0.495831				0.504169
6.34					0.495831				0.504169
6.35					0.495831				0.504169
6.36					0.495831				0.504169
6.37					0.495831				0.504169
6.38					0.495831				0.504169
6.39					0.495831				0.504169
6.4					0.495831				0.504169
6.41					0.495831				0.504169
6.42					0.495831				0.504169
6.43					0.495831				0.504169
6.44					0.495831				0.504169
6.45					0.495831				0.504169
6.46					0.495831				0.504169
6.47					0.495831				0.504169
6.48					0.495831				0.504169
6.49					0.495831				0.504169
6.5					0.495831				0.504169
6.51					0.495831				0.504169
6.52					0.495831				0.504169
6.53					0.495831				0.504169
6.54					0.495831				0.504169
6.55					0.495831				0.504169
6.56					0.495831				0.504169
6.57					0.495831				0.504169
6.58					0.495831				0.504169
6.59					0.495831				0.504169
6.6					0.495831				0.504169
6.61					0.495831				0.504169
6.62					0.495831				0.504169
6.63					0.495831				0.504169
6.64					0.495831				0.504169
6.65					0.495831				0.504169
6.66					0.495831				0.504169
6.67					0.495831				0.504169
6.68					0.495831				0.504169
6.69					0.495831				0.504169
6.7					0.495831				0.504169
6.71					0.495831				0.504169
6.72					0.495831				0.504169
6.73					0.495831				0.504169
6.74					0.495831				0.504169
6.75					0.495831				0.504169
6.76					0.495831				0.504169
6.77					0.495831				0.504169
6.78					0.495831				0.504169
6.79					0.495831				0.504169
6.8					0.495831				0.504169
6.81					0.495831				0.504169
6.82					0.495831				0.504169
6.83					0.495831				0.504169
6.84					0.495831				0.504169
6.85					0.495831				0.504169
6.86					0.495831				0.504169
6.87					0.495831				0.504169
6.88					0.495831				0.504169
6.89					0.495831				0.504169
6.9					0.495831				0.504169
6.91					0.495831				0.504169
6.92					0.495831				0.504169
6.93					0.495831				0.504169
6.94					0.495831				0.504169
6.95					0.495831				0.504169
6.96					0.495831				0.504169
6.97					0.495831				0.504169
6.98					0.495831				0.504169
6.99					0.495831				0.504169
7					0.495831				0.504169
7.01					0.495831				0.504169
7.02					0.495831				0.504169
7.03					0.495831				0.504169
7.04					0.495831				0.504169
7.05					0.495831				0.504169
7.06					0.495831				0.504169
7.07					0.495831				0.504169
7.08					0.495831				0.504169
7.09					0.495831				0.504169
7.1					0.495831				0.504169
7.11					0.495831				0.504169
7.12					0.495831				0.504169
7.13					0.495831				0.504169
7.14					0.495831				0.504169
7.15					0.495831				0.504169
7.16					0.495831				0.504169
7.17					0.495831				0.504169
7.18					0.495831				0.504169
7.19					0.495831				0.504169
7.2					0.495831				0.504169
7.21					0.495831				0.504169
7.22					0.495831				0.504169
7.23					0.495831				0.504169
7.24					0.495831				0.504169
7.25					0.495831				0.504169
7.26					0.495831				0.504169
7.27					0.495831				0.504169
7.28					0.495831				0.504169
7.29					0.495831				0.504169
7.3					0.495831				0.504169
7.31					0.495831				0.504169
7.32					0.495831				0.504169
7.33					0.495831				0.504169
7.34					0.495831				0.504169
7.35					0.495831				0.504169
7.36					0.495831				0.504169
7.37					0.495831				0.504169
7.38					0.495831				0.504169
7.39					0.495831				0.504169
7.4					0.495831				0.504169
7.41					0.495831				0.504169
7.42					0.495831				0.504169
7.43					0.495831				0.504169
7.44					0.495831				0.504169
7.45					0.495831				0.504169
7.46					0.495831				0.504169
7.47					0.495831				0.504169
7.48					0.495831				0.504169
7.49					0.495831				0.504169
7.5					0.495831		0.493413	0.460907	0.504169		0.506587	0.539093
7.51					0.495831				0.504169
7.52					0.495831				0.504169
7.53					0.495831				0.504169
7.54					0.495831				0.504169
7.55					0.495831				0.504169
7.56					0.495831				0.504169
7.57					0.495831				0.504169
7.58					0.495831				0.504169
7.59					0.495831				0.504169
7.6					0.495831				0.504169
7.61					0.495831				0.504169
7.62					0.495831				0.504169
7.63					0.495831				0.504169
7.64					0.495831				0.504169
7.65					0.495831				0.504169
7.66					0.495831				0.504169
7.67					0.495831				0.504169
7.68					0.495831				0.504169
7.69					0.495831				0.504169
7.7					0.495831				0.504169
7.71					0.495831				0.504169
7.72					0.495831				0.504169
7.73					0.495831				0.504169
7.74					0.495831				0.504169
7.75					0.495831				0.504169
7.76					0.495831				0.504169
7.77					0.495831				0.504169
7.78					0.495831				0.504169
7.79					0.495831				0.504169
7.8					0.495831				0.504169
7.81					0.495831				0.504169
7.82					0.495831				0.504169
7.83					0.495831				0.504169
7.84					0.495831				0.504169
7.85					0.495831				0.504169
7.86					0.495831				0.504169
7.87					0.495831				0.504169
7.88					0.495831				0.504169
7.89					0.495831				0.504169
7.9					0.495831				0.504169
7.91					0.495831				0.504169
7.92					0.495831				0.504169
7.93					0.495831				0.504169
7.94					0.495831				0.504169
7.95					0.495831				0.504169
7.96					0.495831				0.504169
7.97					0.495831				0.504169
7.98					0.495831				0.504169
7.99					0.495831				0.504169
8					0.495831				0.504169
8.01					0.495831				0.504169
8.02					0.495831				0.504169
8.03					0.495831				0.504169
8.04					0.495831				0.504169
8.05					0.495831				0.504169
8.06					0.495831				0.504169
8.07					0.495831				0.504169
8.08					0.495831				0.504169
8.09					0.495831				0.504169
8.1					0.495831				0.504169
8.11					0.495831				0.504169
8.12					0.495831				0.504169
8.13					0.495831				0.504169
8.14					0.495831				0.504169
8.15					0.495831				0.504169
8.16					0.495831				0.504169
8.17					0.495831				0.504169
8.18					0.495831				0.504169
8.19					0.495831				0.504169
8.2					0.495831				0.504169
8.21					0.495831				0.504169
8.22					0.495831				0.504169
8.23					0.495831				0.504169
8.24					0.495831				0.504169
8.25					0.495831				0.504169
8.26					0.495831				0.504169
8.27					0.495831				0.504169
8.28					0.495831				0.504169
8.29					0.495831				0.504169
8.3					0.495831				0.504169
8.31					0.495831				0.504169
8.32					0.495831				0.504169
8.33					0.495831				0.504169
8.34					0.495831				0.504169
8.35					0.495831				0.504169
8.36					0.495831				0.504169
8.37					0.495831				0.504169
8.38					0.495831				0.504169
8.39					0.495831				0.504169
8.4					0.495831				0.504169
8.41					0.495831				0.504169
8.42					0.495831				0.504169
8.43					0.495831				0.504169
8.44					0.495831				0.504169
8.45					0.495831				0.504169
8.46					0.495831				0.504169
8.47					0.495831				0.504169
8.48					0.495831				0.504169
8.49					0.495831				0.504169
8.5					0.495831				0.504169
8.51					0.495831				0.504169
8.52					0.495831				0.504169
8.53					0.495831				0.504169
8.54					0.495831				0.504169
8.55					0.495831				0.504169
8.56					0.495831				0.504169
8.57					0.495831				0.504169
8.58					0.495831				0.504169
8.59					0.495831				0.504169
8.6					0.495831				0.504169
8.61					0.495831				0.504169
8.62					0.495831				0.504169
8.63					0.495831				0.504169
8.64					0.495831				0.504169
8.65					0.495831				0.504169
8.66					0.495831				0.504169
8.67					0.495831				0.504169
8.68					0.495831				0.504169
8.69					0.495831				0.504169
8.7					0.495831				0.504169
8.71					0.495831				0.504169
8.72					0.495831				0.504169
8.73					0.495831				0.504169
8.74					0.495831				0.504169
8.75					0.495831				0.504169
8.76					0.495831				0.504169
8.77					0.495831				0.504169
8.78					0.495831				0.504169
8.79					0.495831				0.504169
8.8					0.495831				0.504169
8.81					0.495831				0.504169
8.82					0.495831				0.504169
8.83					0.495831				0.504169
8.84					0.495831				0.504169
8.85					0.495831				0.504169
8.86					0.495831				0.504169
8.87					0.495831				0.504169
8.88					0.495831				0.504169
8.89					0.495831				0.504169
8.9					0.495831				0.504169
8.91					0.495831				0.504169
8.92					0.495831				0.504169
8.93					0.495831				0.504169
8.94					0.495831				0.504169
8.95					0.495831				0.504169
8.96					0.495831				0.504169
8.97					0.495831				0.504169
8.98					0.495831				0.504169
8.99					0.495831				0.504169
9					0.495831				0.504169
9.01					0.495831				0.504169
9.02					0.495831				0.504169
9.03					0.495831				0.504169
9.04					0.495831				0.504169
9.05					0.495831				0.504169
9.06					0.495831				0.504169
9.07					0.495831				0.504169
9.08					0.495831				0.504169
9.09					0.495831				0.504169
9.1					0.495831				0.504169
9.11					0.495831				0.504169
9.12					0.495831				0.504169
9.13					0.495831				0.504169
9.14					0.495831				0.504169
9.15					0.495831				0.504169
9.16					0.495831				0.504169
9.17					0.495831				0.504169
9.18					0.495831				0.504169
9.19					0.495831				0.504169
9.2					0.495831				0.504169
9.21					0.495831				0.504169
9.22					0.495831				0.504169
9.23					0.495831				0.504169
9.24					0.495831				0.504169
9.25					0.495831				0.504169
9.26					0.495831				0.504169
9.27					0.495831				0.504169
9.28					0.495831				0.504169
9.29					0.495831				0.504169
9.3					0.495831				0.504169
9.31					0.495831				0.504169
9.32					0.495831				0.504169
9.33					0.495831				0.504169
9.34					0.495831				0.504169
9.35					0.495831				0.504169
9.36					0.495831				0.504169
9.37					0.495831				0.504169
9.38					0.495831				0.504169
9.39					0.495831				0.504169
9.4					0.495831				0.504169
9.41					0.495831				0.504169
9.42					0.495831				0.504169
9.43					0.495831				0.504169
9.44					0.495831				0.504169
9.45					0.495831				0.504169
9.46					0.495831				0.504169
9.47					0.495831				0.504169
9.48					0.495831				0.504169
9.49					0.495831				0.504169
9.5					0.495831				0.504169
9.51					0.495831				0.504169
9.52					0.495831				0.504169
9.53					0.495831				0.504169
9.54					0.495831				0.504169
9.55					0.495831				0.504169
9.56					0.495831				0.504169
9.57					0.495831				0.504169
9.58					0.495831				0.504169
9.59					0.495831				0.504169
9.6					0.495831				0.504169
9.61					0.495831				0.504169
9.62					0.495831				0.504169
9.63					0.495831				0.504169
9.64					0.495831				0.504169
9.65					0.495831				0.504169
9.66					0.495831				0.504169
9.67					0.495831				0.504169
9.68					0.495831				0.504169
9.69					0.495831				0.504169
9.7					0.495831				0.504169
9.71					0.495831				0.504169
9.72					0.495831				0.504169
9.73					0.495831				0.504169
9.74					0.495831				0.504169
9.75					0.495831				0.504169
9.76					0.495831				0.504169
9.77					0.495831				0.504169
9.78					0.495831				0.504169
9.79					0.495831				0.504169
9.8					0.495831				0.504169
9.81					0.495831				0.504169
9.82					0.495831				0.504169
9.83					0.495831				0.504169
9.84					0.495831				0.504169
9.85					0.495831				0.504169
9.86					0.495831				0.504169
9.87					0.495831				0.504169
9.88					0.495831				0.504169
9.89					0.495831				0.504169
9.9					0.495831				0.504169
9.91					0.495831				0.504169
9.92					0.495831				0.504169
9.93					0.495831				0.504169
9.94					0.495831				0.504169
9.95					0.495831				0.504169
9.96					0.495831				0.504169
9.97					0.495831				0.504169
9.98					0.495831				0.504169
9.99					0.495831				0.504169
10					0.495831		0.502066	0.474948	0.504169		0.497934	0.525052

[truncated: 10 more sheets: Fig.2 - supp4f, Fig. 2 - supp4h, Fig. 2 - supp 6b, Fig. 2 - supp 6d, Fig. 2 - supp7b, Fig. 2 - supp7d, Fig. 2 - supp8b, Fig. 2 - supp8d, Fig. 2 - supp9b, Fig. 2 - supp9d]
