# Supplementary material for: Robust cullin-RING ligase function is established by a multiplicity of poly-ubiquitylation pathways
Source: eLife. 2019 Dec 23;8:e51163. doi: 10.7554/eLife.51163 (PMC6975927; doi:10.7554/eLife.51163)
Supplement: Figure 3—source data 1. [file elife-51163-fig3-data1.xlsx]

## Sheet: Fig. 3a
	UBE2D3-1	UBE2D3-2	UBE2R2-1	UBE2R2-2	ARIH1-1	ARIH1-2	UBE2D3/UBE2R2-1	UBE2D3/UBE2R2-2	ARIH1-UBE2R2-1	ARIH1-UBE2R2-2	UBE2D3-1 cell	UBE2D3-2 cell	UBE2R2-1 cell	UBE2R2-2 cell	ARIH1-1 cell	ARIH1-2 cell	UBE2D3/UBE2R2-1 cell	UBE2D3/UBE2R2-2 cell	ARIH1-UBE2R2-1 cell	ARIH1-UBE2R2-2 cell
S0	0.774654	0.78621	0.813294	0.723605	0.807867	0.756489	0.718743	0.73921	0.753281	0.831395	0.875231	0.863982	0.984105	0.956374	0.776576	0.823129	0.785737	0.823613	0.849527	0.789291
S1	0.13509	0.134029	0	5.25e-05	0.078318	0.141399	0.022875	0.015321	0.051106	0.046122	0.084542	0.093447	0.003	0.012725	0.116467	0.093176	0.033645	0.025335	0.026464	0.041984
S2	0.054151	0.047382	0.010425	0.01222	0.066008	0.079495	0.020753	0.022408	0.02462	0.013579	0.030431	0.030078	0.002368	0.004473	0.076883	0.055983	0.033248	0.027378	0.031228	0.038735
S3	0.02474	0.02007	0.006054	0.011451	0.034735	0.019647	0.017471	0.019969	0.021695	0.015031	0.009796	0.012494	0.002383	0.005102	0.030075	0.027712	0.029619	0.024068	0.02313	0.028363
S≥4	0.011364	0.012309	0.171307	0.252672	0.013073	0.00297	0.220158	0.203093	0.149297	0.093873	0	0	0.008144	0.021325	0	0	0.117751	0.099607	0.069651	0.101628

## Sheet: Fig. 3b
	UBE2D3-1	UBE2D3-2	UBE2R2-1	UBE2R2-2	ARIH1-1	ARIH1-2	UBE2D3/UBE2R2-1	UBE2D3/UBE2R2-2	ARIH1-UBE2R2-1	ARIH1-UBE2R2-2	UBE2D3-1 cell	UBE2D3-2 cell	UBE2R2-1 cell	UBE2R2-2 cell	ARIH1-1 cell	ARIH1-2 cell	UBE2D3/UBE2R2-1 cell	UBE2D3/UBE2R2-2 cell	ARIH1-UBE2R2-1 cell	ARIH1-UBE2R2-2 cell
S0	0.355936	0.380927	0.874839	0.786811	0.882342	0.784833	0.394884	0.340018	0.803712	0.876833	0.573089	0.431498	0.980461	0.971294	0.831382	0.852123	0.441535	0.397398	0.905663	0.852885
S1	0.257523	0.251744	0.002134	0.000162	0.099551	0.113817	0.084787	0.08962	0.034256	0.02224	0.205063	0.247395	0	0.001586	0.095806	0.086359	0.181101	0.185942	0.002512	0.036357
S2	0.127264	0.119263	0.002856	0.003093	0.018106	0.071144	0.066181	0.07969	0.01374	0.009372	0.083624	0.115001	0.002891	0.002736	0.047535	0.040239	0.10566	0.119662	0.019344	0.028539
S3	0.124324	0.098131	0.002204	0.004169	0	0.022544	0.048402	0.059153	0.008509	0.006746	0.067321	0.094913	0.00161	0.003244	0.018385	0.015499	0.086304	0.09133	0.0175	0.021511
S≥4	0.134953	0.149935	0.117967	0.205765	0	0.007662	0.405746	0.431519	0.139783	0.084808	0.070904	0.111193	0.016671	0.02114	0.006892	0.005779	0.185401	0.205669	0.054981	0.060708
