# Supplementary material for: Robust cullin-RING ligase function is established by a multiplicity of poly-ubiquitylation pathways
Source: eLife. 2019 Dec 23;8:e51163. doi: 10.7554/eLife.51163 (PMC6975927; doi:10.7554/eLife.51163)
Supplement: Figure 4—figure supplement 1—source data 1. [file elife-51163-fig4-figsupp1-data1.xlsx]

## Sheet: Fig. 4 - supp1a 
S0	0.982612	0.986139	0.946359	0.951148	0.871795	0.898508	0.784628	0.812381	0.692572	0.703289
S1	0.0158305	0.0116445	0.0364314	0.0370784	0.0766462	0.067514	0.0841801	0.0998125	0.0691266	0.0954285
S2	0.00519568	0.0018883	0.0177705	0.00649718	0.0390481	0.0217979	0.0763386	0.0535191	0.0919779	0.0981405
S3	0.000485878	0.000917334	0.00531073	0.00236085	0.0124957	0.00657613	0.035865	0.0221137	0.0760705	0.0603638
S≥4			0	0.00291587	0.00126827	0.00560382	0.0189886	0.0121733	0.0702535	0.0427778

## Sheet: Fig. 4 - supp1b
S0	0.986985	0.999885	0.964755	0.970711	0.9325	0.92698	0.885837	0.882408	0.794724	0.856359
S1	0.0148216	0.0106017	0.0331967	0.0318799	0.0642034	0.0609318	0.0887069	0.079376	0.141675	0.0873406
S2	0.00138174	0	0.00326979	0.00439886	0.00855249	0.00838268	0.0216241	0.0223166	0.0442382	0.0294282
S3			0.00117548	0	0	0.00190202	0.00717413	0.00791127	0.0151801	0.0144408
S≥4			0.000252086	0.000298353	0	0.00248961	0	0.00798828	0.00418184	0.0124319

## Sheet: Fig. 4 - supp1c
S0	1.00354	0.980611	0.997652	0.987294	0.990807	0.987502	0.975261	0.972885	0.930189	0.942058
S1	0	0.0121458	0	0.00567125	0.000467616	0.00108315	0.000803396	0.00100948	0	0.00176612
S2	0	0.000648023	0.00117761	0.000252567	0.000452611	0.00103477	0.000680065	0.00074371	0.00258378	0.00144955
S3	0.00155341	0.000817205	0.00261801	0	0.00213858	6.76638e-05	0.0012402	0	0.00541533	0.00379115
S≥4	0	0.00577819	0.00144523	0.0076652	0.0061346	0.0103123	0.0220151	0.0258471	0.0628639	0.0509351

## Sheet: Fig. 4 - supp1d
S0	0.972681	0.993005	0.94945	0.976994	0.831887	0.918351	0.763655	0.843982	0.674466	0.759118
S1	0.0103589	0.00417165	0.00795431	0.00837422	0.0188047	0.0168917	0.0268641	0.0192882	0.0144666	0.0195659
S2	0.011146	0.0038661	0.0181945	0.00869102	0.0295777	0.0205003	0.0291374	0.0253379	0.0245862	0.026265
S3	0.00737507	0.000453012	0.0151574	0.00434554	0.0344397	0.0145472	0.0351743	0.0247532	0.0308159	0.0252193
S≥4	0.00113444	0	0.0108462	0.00331736	0.0852905	0.0297099	0.14517	0.0866386	0.255666	0.169832

## Sheet: Fig. 4 - supp1e
S0	0.987451	0.964232	0.969697	0.941441	0.905866	0.92089	0.865063	0.892346	0.815897	0.878402
S1	0.00392194	0.0144059	0.00902365	0.0139897	0.0143602	0.00898545	0.013443	0.00295417	0.0145825	0
S2	0.00680927	0.00423135	0.0100779	0.00596421	0.0171225	0.00731919	0.0181176	0.0075365	0.0174994	0.00180282
S3	0.00370767	0.00262873	0.00871818	0.00595474	0.018183	0.0112031	0.0215049	0.013872	0.0212929	0.0145729
S≥4	0.000617903	0.0145021	0.00505164	0.0326504	0.0444685	0.051602	0.081871	0.0832918	0.130728	0.112233
