# Supplementary material for: Robust cullin-RING ligase function is established by a multiplicity of poly-ubiquitylation pathways
Source: eLife. 2019 Dec 23;8:e51163. doi: 10.7554/eLife.51163 (PMC6975927; doi:10.7554/eLife.51163)
Supplement: Figure 5—source data 1. [file elife-51163-fig5-data1.xlsx]

## Sheet: PANEL B
WT HEK 293T (bCATENIN)	UBE2R1/2△ (bCATENIN)	WT HEK 293T (CYCLIN E)	UBE2R1/2△ (CYCLIN E)	WT HEK 293T (p27)	UBE2R1/2△ (p27)
1.28978	0.91789	0.977364	0.860968	0.936639	1.22477
0.974813	0.729738	1.08588	0.775725	0.896902	1.18745
1.5209	0.966571	1.32841	0.914995	0.964653	1.27051
1.05623	0.796758	1.85887	0.644352	1.16943	1.24664
1.32015	0.758579	1.00931	0.81205	0.759033	0.824827
1.0448	0.62379	1.01611	0.715956	0.727261	0.791883

## Sheet: PANEL C
time (hr)	control #1-2	control #1-2	control G3-1	control G3-2	control D5-1	control D5-2	△B3-1	△B3-2	△E4-1	△E4-2	△A10-1	△A10-2
0	1	1	1	1	1	1	1	1	1	1	1	1
1	0.723844	0.869391	0.545114	0.412108	0.844682	0.621605	0.493439	0.775946	0.669558	0.972222	0.536421	0.654846
3	0.457654	0.499921	0.367376	0.248912	0.640302	0.414762	0.402241	0.562055	0.652607	0.711126	0.435497	0.403605
6	0.250193	0.343911	0.200545	0.184276	0.422869	0.365607	0.319039	0.506786	0.495856	0.562485	0.393534	0.233457

## Sheet: PANEL D
time (min)	control #1-2	control #1-2	control G3-1	control G3-2	control D5-1	control D5-2	△B3-1	△B3-2	△E4-1	△E4-2	△A10-1	△A10-2
0	1	1	1	1	1	1	1	1	1	1	1	1
10	0.850217	1.07551	0.840123	0.559711	0.905133	0.525611	0.955724	0.563879	1.04457	0.705654	0.927196	0.954252
30	0.467662	0.64357	0.396311	0.359271	0.440185	0.357839	0.384138	0.262612	0.470427	0.38681	0.285088	0.533178

## Sheet: PANEL E
	control #1-2	control #1-2	control G3-1	control G3-2	control D5-1	control D5-2	△B3-1	△B3-2	△E4-1	△E4-2	△A10-1	△A10-2
G0	1.97	1.69	2.97	2.44	2.04	1.54	1.99	1.93	2.38	3.07	4.21	3.92
G1	41.1	43.2	42.8	42.6	43.2	42.1	41.3	40.5	44.5	44.3	40.7	42
S	14.7	17.1	20.1	15.1	15.4	18.8	16.1	19.2	13.3	16	15.7	17.2
G2	24.6	25	23.7	24.8	26.2	26.1	23.4	23.3	24.7	23.3	23.9	24.8
