# Supplementary material for: Robust cullin-RING ligase function is established by a multiplicity of poly-ubiquitylation pathways
Source: eLife. 2019 Dec 23;8:e51163. doi: 10.7554/eLife.51163 (PMC6975927; doi:10.7554/eLife.51163)
Supplement: Figure 7—figure supplement 1—source data 1. [file elife-51163-fig7-figsupp1-data1.xlsx]

## Sheet: Fig. 7 - supp1c
UBE2G1 concentration	UBbCAT-1	UBbCAT-2
0.078125	0.087419	0.141979
0.15625	0.179345	0.259696
0.3125	0.337519	0.466986
0.625	0.733003	0.729342
1.25	1.01004	1.27167
2.5	1.44936	1.72865
5	1.62078	1.92725
10	1.92891	2.00603
20	1.86369	2.5499

## Sheet: Fig. 7 - supp1d
time	S1 curve		S2 curve		S3 curve		S1-1 data	S1-2 data	S2-1 data	S2-2 data	S3-1 data	S3-2 data
0	1		0		0
0.025	0.986671		0.01311		0.000216		0.985202	0.978107	0.012247	0.016568	0.004731	0.002433
0.05	0.973917		0.025233		0.00083		0.969237	0.957691	0.026807	0.034993	0.005176	0.003028
0.075	0.961713		0.036427		0.001794		0.943555	0.928798	0.050369	0.060856	0.006895	0.005348
0.1	0.950036		0.046748		0.003064		0.935683	0.923794	0.055979	0.065907	0.007988	0.006511
0.125	0.938863		0.05625		0.004601
0.15	0.928172		0.064984		0.006366
0.175	0.917941		0.072995		0.008327
0.2	0.908153		0.08033		0.010454		0.903535	0.882367	0.081077	0.094507	0.013879	0.015911
0.225	0.898786		0.087031		0.012717
0.25	0.889824		0.093137		0.015092
0.275	0.881248		0.098687		0.017556
0.3	0.873042		0.103715		0.020088		0.862237	0.844481	0.101976	0.125066	0.029003	0.022951
0.325	0.86519		0.108257		0.022668
0.35	0.857677		0.112343		0.02528
0.375	0.850489		0.116003		0.027909
0.4	0.84361		0.119266		0.030541
0.425	0.837028		0.122159		0.033164
0.45	0.83073		0.124706		0.035767
0.475	0.824703		0.126932		0.03834
0.5	0.818937		0.128857		0.040875		0.834973	0.805894	0.118093	0.131927	0.037176	0.045155
0.525	0.81342		0.130505		0.043364
0.55	0.80814		0.131894		0.045801
0.575	0.803088		0.133042		0.04818
0.6	0.798254		0.133969		0.050497
0.625	0.793629		0.134689		0.052748
0.65	0.789203		0.135218		0.054929
0.675	0.784969		0.135572		0.057037
0.7	0.780916		0.135763		0.059071
0.725	0.777039		0.135805		0.061029
0.75	0.773329		0.135709		0.062909		0.813206	0.767122	0.118652	0.136899	0.049163	0.066585
0.775	0.769779		0.135487		0.06471
0.8	0.766382		0.13515		0.066433
0.825	0.763132		0.134707		0.068078
0.85	0.760022		0.134168		0.069643
0.875	0.757046		0.133542		0.071131
0.9	0.754199		0.132836		0.072542
0.925	0.751474		0.132059		0.073876
0.95	0.748867		0.131217		0.075135
0.975	0.746372		0.130318		0.07632
1	0.743985		0.129366		0.077433		0.778437	0.737233	0.121851	0.120844	0.068479	0.083256
1.025	0.741701		0.128369		0.078475
1.05	0.739516		0.127332		0.079447
1.075	0.737425		0.12626		0.080353
1.1	0.735424		0.125157		0.081193
1.125	0.733509		0.124027		0.081969
1.15	0.731677		0.122876		0.082683
1.175	0.729924		0.121706		0.083338
1.2	0.728247		0.120522		0.083935
1.225	0.726642		0.119325		0.084476
1.25	0.725106		0.11812		0.084964
1.275	0.723636		0.11691		0.085399
1.3	0.72223		0.115696		0.085786
1.325	0.720885		0.114481		0.086124
1.35	0.719597		0.113267		0.086417
1.375	0.718365		0.112056		0.086667
1.4	0.717187		0.110851		0.086874
1.425	0.716059		0.109652		0.087042
1.45	0.71498		0.108461		0.087172
1.475	0.713947		0.10728		0.087265
1.5	0.712959		0.106109		0.087325		0.763974	0.708057	0.112226	0.103235	0.077063	0.100052
1.525	0.712013		0.104951		0.087352
1.55	0.711109		0.103806		0.087348
1.575	0.710243		0.102674		0.087314
1.6	0.709415		0.101557		0.087253
1.625	0.708622		0.100456		0.087167
1.65	0.707864		0.09937		0.087055
1.675	0.707138		0.098301		0.086921
1.7	0.706444		0.09725		0.086765
1.725	0.705779		0.096215		0.086589
1.75	0.705143		0.095199		0.086394
1.775	0.704535		0.094201		0.086181
1.8	0.703953		0.093221		0.085952
1.825	0.703396		0.09226		0.085708
1.85	0.702863		0.091317		0.08545
1.875	0.702353		0.090394		0.085179
1.9	0.701865		0.089489		0.084897
1.925	0.701398		0.088603		0.084603
1.95	0.700952		0.087736		0.0843
1.975	0.700524		0.086888		0.083987
2	0.700115		0.086058		0.083667
2.025	0.699724		0.085247		0.083339
2.05	0.699349		0.084455		0.083005
2.075	0.698991		0.083681		0.082665
2.1	0.698648		0.082926		0.08232
2.125	0.69832		0.082188		0.081971
2.15	0.698006		0.081468		0.081619
2.175	0.697706		0.080766		0.081263
2.2	0.697418		0.080081		0.080905
2.225	0.697143		0.079414		0.080546
2.25	0.69688		0.078763		0.080185
2.275	0.696628		0.078129		0.079823
2.3	0.696387		0.077512		0.079461
2.325	0.696157		0.07691		0.079099
2.35	0.695936		0.076324		0.078738
2.375	0.695725		0.075754		0.078377
2.4	0.695523		0.0752		0.078018
2.425	0.69533		0.07466		0.07766
2.45	0.695145		0.074135		0.077305
2.475	0.694968		0.073624		0.076952
2.5	0.694799		0.073127		0.076601		0.78508	0.682455	0.110462	0.072636	0.064597	0.092036
2.525	0.694636		0.072645		0.076253
2.55	0.694481		0.072175		0.075908
2.575	0.694333		0.071719		0.075566
2.6	0.694191		0.071276		0.075228
2.625	0.694055		0.070846		0.074893
2.65	0.693925		0.070428		0.074562
2.675	0.693801		0.070022		0.074235
2.7	0.693682		0.069628		0.073913
2.725	0.693568		0.069245		0.073594
2.75	0.693459		0.068874		0.07328
2.775	0.693355		0.068513		0.07297
2.8	0.693255		0.068163		0.072664
2.825	0.69316		0.067824		0.072364
2.85	0.693069		0.067495		0.072068
2.875	0.692981		0.067175		0.071776
2.9	0.692898		0.066865		0.07149
2.925	0.692818		0.066565		0.071208
2.95	0.692741		0.066274		0.070931
2.975	0.692668		0.065992		0.070659
3	0.692598		0.065718		0.070391
3.025	0.692531		0.065453		0.070129
3.05	0.692466		0.065196		0.069871
3.075	0.692405		0.064947		0.069619
3.1	0.692346		0.064705		0.069371
3.125	0.69229		0.064472		0.069128
3.15	0.692236		0.064245		0.06889
3.175	0.692185		0.064026		0.068657
3.2	0.692136		0.063814		0.068428
3.225	0.692088		0.063608		0.068205
3.25	0.692043		0.063409		0.067986
3.275	0.692		0.063216		0.067771
3.3	0.691959		0.063029		0.067561
3.325	0.691919		0.062849		0.067356
3.35	0.691882		0.062674		0.067156
3.375	0.691845		0.062505		0.066959
3.4	0.691811		0.062341		0.066768
3.425	0.691778		0.062182		0.06658
3.45	0.691746		0.062029		0.066397
3.475	0.691716		0.061881		0.066218
3.5	0.691687		0.061737		0.066044
3.525	0.691659		0.061598		0.065873
3.55	0.691632		0.061464		0.065707
3.575	0.691607		0.061334		0.065544
3.6	0.691583		0.061209		0.065386
3.625	0.691559		0.061087		0.065231
3.65	0.691537		0.06097		0.06508
3.675	0.691516		0.060856		0.064933
3.7	0.691495		0.060747		0.06479
3.725	0.691476		0.06064		0.06465
3.75	0.691457		0.060538		0.064514
3.775	0.691439		0.060439		0.064381
3.8	0.691422		0.060343		0.064252
3.825	0.691406		0.06025		0.064126
3.85	0.69139		0.060161		0.064003
3.875	0.691375		0.060074		0.063883
3.9	0.691361		0.059991		0.063767
3.925	0.691347		0.05991		0.063653
3.95	0.691334		0.059832		0.063543
3.975	0.691321		0.059756		0.063436
4	0.691309		0.059684		0.063331
4.025	0.691298		0.059613		0.06323
4.05	0.691287		0.059545		0.063131
4.075	0.691276		0.05948		0.063034
4.1	0.691266		0.059416		0.062941
4.125	0.691257		0.059355		0.06285
4.15	0.691248		0.059296		0.062761
4.175	0.691239		0.059239		0.062675
4.2	0.69123		0.059184		0.062591
4.225	0.691222		0.05913		0.06251
4.25	0.691214		0.059079		0.062431
4.275	0.691207		0.059029		0.062354
4.3	0.6912		0.058981		0.06228
4.325	0.691193		0.058935		0.062207
4.35	0.691187		0.05889		0.062137
4.375	0.691181		0.058847		0.062068
4.4	0.691175		0.058806		0.062002
4.425	0.691169		0.058766		0.061937
4.45	0.691164		0.058727		0.061875
4.475	0.691158		0.058689		0.061814
4.5	0.691153		0.058653		0.061755
4.525	0.691149		0.058618		0.061697
4.55	0.691144		0.058585		0.061642
4.575	0.69114		0.058552		0.061588
4.6	0.691136		0.058521		0.061535
4.625	0.691132		0.058491		0.061485
4.65	0.691128		0.058462		0.061435
4.675	0.691124		0.058433		0.061387
4.7	0.691121		0.058406		0.061341
4.725	0.691117		0.05838		0.061296
4.75	0.691114		0.058355		0.061252
4.775	0.691111		0.058331		0.06121
4.8	0.691108		0.058307		0.061169
4.825	0.691105		0.058284		0.061129
4.85	0.691103		0.058262		0.06109
4.875	0.6911		0.058241		0.061053
4.9	0.691098		0.058221		0.061017
4.925	0.691095		0.058201		0.060981
4.95	0.691093		0.058182		0.060947
4.975	0.691091		0.058164		0.060914
5	0.691089		0.058147		0.060882		0.710997	0.650315	0.072333	0.048765	0.073486	0.060229
5.025	0.691087		0.05813		0.060851
5.05	0.691085		0.058113		0.060821
5.075	0.691083		0.058098		0.060792
5.1	0.691081		0.058082		0.060764
5.125	0.69108		0.058068		0.060736
5.15	0.691078		0.058053		0.06071
5.175	0.691077		0.05804		0.060684
5.2	0.691075		0.058027		0.060659
5.225	0.691074		0.058014		0.060635
5.25	0.691072		0.058002		0.060612
5.275	0.691071		0.05799		0.060589
5.3	0.69107		0.057979		0.060567
5.325	0.691069		0.057968		0.060546
5.35	0.691068		0.057957		0.060526
5.375	0.691067		0.057947		0.060506
5.4	0.691066		0.057937		0.060487
5.425	0.691065		0.057928		0.060468
5.45	0.691064		0.057919		0.06045
5.475	0.691063		0.05791		0.060433
5.5	0.691062		0.057901		0.060416
5.525	0.691061		0.057893		0.0604
5.55	0.69106		0.057885		0.060384
5.575	0.69106		0.057878		0.060369
5.6	0.691059		0.05787		0.060354
5.625	0.691058		0.057863		0.060339
5.65	0.691058		0.057857		0.060326
5.675	0.691057		0.05785		0.060312
5.7	0.691056		0.057844		0.060299
5.725	0.691056		0.057838		0.060287
5.75	0.691055		0.057832		0.060275
5.775	0.691055		0.057826		0.060263
5.8	0.691054		0.057821		0.060252
5.825	0.691054		0.057816		0.060241
5.85	0.691053		0.057811		0.06023
5.875	0.691053		0.057806		0.06022
5.9	0.691052		0.057801		0.06021
5.925	0.691052		0.057797		0.0602
5.95	0.691052		0.057792		0.060191
5.975	0.691051		0.057788		0.060182
6	0.691051		0.057784		0.060173
6.025	0.691051		0.05778		0.060165
6.05	0.69105		0.057776		0.060157
6.075	0.69105		0.057773		0.060149
6.1	0.69105		0.057769		0.060142
6.125	0.691049		0.057766		0.060134
6.15	0.691049		0.057763		0.060127
6.175	0.691049		0.05776		0.06012
6.2	0.691049		0.057757		0.060114
6.225	0.691048		0.057754		0.060107
6.25	0.691048		0.057751		0.060101
6.275	0.691048		0.057748		0.060095
6.3	0.691048		0.057746		0.06009
6.325	0.691047		0.057743		0.060084
6.35	0.691047		0.057741		0.060079
6.375	0.691047		0.057739		0.060073
6.4	0.691047		0.057737		0.060068
6.425	0.691047		0.057734		0.060064
6.45	0.691047		0.057732		0.060059
6.475	0.691046		0.05773		0.060054
6.5	0.691046		0.057728		0.06005
6.525	0.691046		0.057727		0.060046
6.55	0.691046		0.057725		0.060042
6.575	0.691046		0.057723		0.060038
6.6	0.691046		0.057722		0.060034
6.625	0.691046		0.05772		0.06003
6.65	0.691046		0.057718		0.060027
6.675	0.691045		0.057717		0.060023
6.7	0.691045		0.057716		0.06002
6.725	0.691045		0.057714		0.060017
6.75	0.691045		0.057713		0.060014
6.775	0.691045		0.057712		0.060011
6.8	0.691045		0.05771		0.060008
6.825	0.691045		0.057709		0.060005
6.85	0.691045		0.057708		0.060002
6.875	0.691045		0.057707		0.06
6.9	0.691045		0.057706		0.059997
6.925	0.691045		0.057705		0.059995
6.95	0.691045		0.057704		0.059993
6.975	0.691044		0.057703		0.05999
7	0.691044		0.057702		0.059988
7.025	0.691044		0.057701		0.059986
7.05	0.691044		0.057701		0.059984
7.075	0.691044		0.0577		0.059982
7.1	0.691044		0.057699		0.05998
7.125	0.691044		0.057698		0.059978
7.15	0.691044		0.057698		0.059977
7.175	0.691044		0.057697		0.059975
7.2	0.691044		0.057696		0.059973
7.225	0.691044		0.057696		0.059972
7.25	0.691044		0.057695		0.05997
7.275	0.691044		0.057694		0.059969
7.3	0.691044		0.057694		0.059967
7.325	0.691044		0.057693		0.059966
7.35	0.691044		0.057693		0.059965
7.375	0.691044		0.057692		0.059963
7.4	0.691044		0.057692		0.059962
7.425	0.691044		0.057691		0.059961
7.45	0.691044		0.057691		0.05996
7.475	0.691044		0.057691		0.059959
7.5	0.691044		0.05769		0.059958		0.695828	0.640329	0.064036	0.042947	0.068417	0.052821
7.525	0.691044		0.05769		0.059957
7.55	0.691044		0.057689		0.059956
7.575	0.691044		0.057689		0.059955
7.6	0.691044		0.057689		0.059954
7.625	0.691044		0.057688		0.059953
7.65	0.691044		0.057688		0.059952
7.675	0.691043		0.057688		0.059951
7.7	0.691043		0.057687		0.059951
7.725	0.691043		0.057687		0.05995
7.75	0.691043		0.057687		0.059949
7.775	0.691043		0.057686		0.059948
7.8	0.691043		0.057686		0.059948
7.825	0.691043		0.057686		0.059947
7.85	0.691043		0.057686		0.059946
7.875	0.691043		0.057685		0.059946
7.9	0.691043		0.057685		0.059945
7.925	0.691043		0.057685		0.059945
7.95	0.691043		0.057685		0.059944
7.975	0.691043		0.057685		0.059943
8	0.691043		0.057684		0.059943
8.025	0.691043		0.057684		0.059942
8.05	0.691043		0.057684		0.059942
8.075	0.691043		0.057684		0.059941
8.1	0.691043		0.057684		0.059941
8.125	0.691043		0.057684		0.059941
8.15	0.691043		0.057683		0.05994
8.175	0.691043		0.057683		0.05994
8.2	0.691043		0.057683		0.059939
8.225	0.691043		0.057683		0.059939
8.25	0.691043		0.057683		0.059939
8.275	0.691043		0.057683		0.059938
8.3	0.691043		0.057683		0.059938
8.325	0.691043		0.057683		0.059938
8.35	0.691043		0.057682		0.059937
8.375	0.691043		0.057682		0.059937
8.4	0.691043		0.057682		0.059937
8.425	0.691043		0.057682		0.059937
8.45	0.691043		0.057682		0.059936
8.475	0.691043		0.057682		0.059936
8.5	0.691043		0.057682		0.059936
8.525	0.691043		0.057682		0.059935
8.55	0.691043		0.057682		0.059935
8.575	0.691043		0.057682		0.059935
8.6	0.691043		0.057682		0.059935
8.625	0.691043		0.057681		0.059935
8.65	0.691043		0.057681		0.059934
8.675	0.691043		0.057681		0.059934
8.7	0.691043		0.057681		0.059934
8.725	0.691043		0.057681		0.059934
8.75	0.691043		0.057681		0.059934
8.775	0.691043		0.057681		0.059934
8.8	0.691043		0.057681		0.059933
8.825	0.691043		0.057681		0.059933
8.85	0.691043		0.057681		0.059933
8.875	0.691043		0.057681		0.059933
8.9	0.691043		0.057681		0.059933
8.925	0.691043		0.057681		0.059933
8.95	0.691043		0.057681		0.059933
8.975	0.691043		0.057681		0.059932
9	0.691043		0.057681		0.059932
9.025	0.691043		0.057681		0.059932
9.05	0.691043		0.057681		0.059932
9.075	0.691043		0.057681		0.059932
9.1	0.691043		0.05768		0.059932
9.125	0.691043		0.05768		0.059932
9.15	0.691043		0.05768		0.059932
9.175	0.691043		0.05768		0.059932
9.2	0.691043		0.05768		0.059932
9.225	0.691043		0.05768		0.059931
9.25	0.691043		0.05768		0.059931
9.275	0.691043		0.05768		0.059931
9.3	0.691043		0.05768		0.059931
9.325	0.691043		0.05768		0.059931
9.35	0.691043		0.05768		0.059931
9.375	0.691043		0.05768		0.059931
9.4	0.691043		0.05768		0.059931
9.425	0.691043		0.05768		0.059931
9.45	0.691043		0.05768		0.059931
9.475	0.691043		0.05768		0.059931
9.5	0.691043		0.05768		0.059931
9.525	0.691043		0.05768		0.059931
9.55	0.691043		0.05768		0.059931
9.575	0.691043		0.05768		0.059931
9.6	0.691043		0.05768		0.05993
9.625	0.691043		0.05768		0.05993
9.65	0.691043		0.05768		0.05993
9.675	0.691043		0.05768		0.05993
9.7	0.691043		0.05768		0.05993
9.725	0.691043		0.05768		0.05993
9.75	0.691043		0.05768		0.05993
9.775	0.691043		0.05768		0.05993
9.8	0.691043		0.05768		0.05993
9.825	0.691043		0.05768		0.05993
9.85	0.691043		0.05768		0.05993
9.875	0.691043		0.05768		0.05993
9.9	0.691043		0.05768		0.05993
9.925	0.691043		0.05768		0.05993
9.95	0.691043		0.05768		0.05993
9.975	0.691043		0.05768		0.05993
10	0.691043		0.05768		0.05993		0.685022	0.636183	0.056879	0.03667	0.061223	0.043421
