# Supplementary material for: Robust cullin-RING ligase function is established by a multiplicity of poly-ubiquitylation pathways
Source: eLife. 2019 Dec 23;8:e51163. doi: 10.7554/eLife.51163 (PMC6975927; doi:10.7554/eLife.51163)
Supplement: Figure 7—source data 1. [file elife-51163-fig7-data1.xlsx]

## Sheet: p-values CYCLIN E
	WT HEK 293T (non-silecing siRNA)	WT HEK 293T (UBE2G1 targeting siRNA)	UBE2R1/2△ (non-silecing siRNA)	UBE2R1/2△ (UBE2G1 targeting siRNA)
WT HEK 293T (non-silecing siRNA)		0.34	0.12	0.003
WT HEK 293T (UBE2G1 targeting siRNA)
UBE2R1/2△ (non-silecing siRNA)				0.78

## Sheet: p-values p27
	WT HEK 293T (non-silecing siRNA)	WT HEK 293T (UBE2G1 targeting siRNA)	UBE2R1/2△ (non-silecing siRNA)	UBE2R1/2△ (UBE2G1 targeting siRNA)
WT HEK 293T (non-silecing siRNA)		0.28	0.04	0.0002
WT HEK 293T (UBE2G1 targeting siRNA)
UBE2R1/2△ (non-silecing siRNA)				0.61

## Sheet: p-values Hif1a
	WT HEK 293T (non-silecing siRNA)	WT HEK 293T (UBE2G1 targeting siRNA)	UBE2R1/2△ (non-silecing siRNA)	UBE2R1/2△ (UBE2G1 targeting siRNA)
WT HEK 293T (non-silecing siRNA)		0.88	0.0002	0.003
WT HEK 293T (UBE2G1 targeting siRNA)
UBE2R1/2△ (non-silecing siRNA)				0.05
