# Supplementary material for: Robust cullin-RING ligase function is established by a multiplicity of poly-ubiquitylation pathways
Source: eLife. 2019 Dec 23;8:e51163. doi: 10.7554/eLife.51163 (PMC6975927; doi:10.7554/eLife.51163)
Supplement: Figure 7—source data 2. [file elife-51163-fig7-data2.xlsx]

## Sheet: PANEL B
WT HEK 293T (HIF1a) (non-silecing siRNA)	WT HEK 293T (HIF1a) (UBE2G1 targeting siRNA)	UBE2R1/2△ (HIF1a) (non-silecing siRNA)	UBE2R1/2△ (HIF1a) (UBE2G1 targeting siRNA)	WT HEK 293T (CYCLIN E) (non-silecing siRNA)	WT HEK 293T (CYCLIN E) (UBE2G1 targeting siRNA)	UBE2R1/2△ (CYCLIN E) (non-silecing siRNA)	UBE2R1/2△ (CYCLIN E) (UBE2G1 targeting siRNA)	WT HEK 293T (p27) (non-silecing siRNA)	WT HEK 293T (p27) (UBE2G1 targeting siRNA)	UBE2R1/2△ (p27) (non-silecing siRNA)	UBE2R1/2△ (p27) (UBE2G1 targeting siRNA)
0.174731	0.223744	1.0565	1.90119	0.629719	0.778736	0.939142	1.21921	0.384982	0.367373	1.0121	1.51374
0.357317	0.388082	1.3665	2.40824	0.812754	0.96337	0.593691	1.15387	0.34394	0.462699	0.8223	1.3963
0.261767	0.290185	1.35053	3.89312	0.855733	1.25042	1.60527	1.2304	0.528049	0.791341	2.86297	1.61695
0.789832	0.590482	0.981084	2.19555	1.15636	1.2511	1.6109	1.25451	0.351566	0.397626	0.861733	2.03565
0.254668	0.179008	0.754957	1.6596	0.772981	0.747487	0.982694	0.988225	0.512822	0.417288	1.00135	0.991044
0.458123	0.74471	1.15617	0.563911	0.531243	0.611644	0.942146	1.11841	0.345848	0.531852	0.703562	0.895341

## Sheet: PANEL D
	-	-	UBE2G1	UBE2G1	UBE2D3	UBE2D3	UBE2D3/UBE2G1	UBE2D3/UBE2G1	ARIH1	ARIH1	ARIH1/UBE2G1	ARIH1/UBE2G1
S0	0.982612	0.986139	1.01342	1.0068	0.743499	0.723984	0.817595	0.807278	0.773846	0.767509	0.899051	0.882195
S1	0.0158305	0.0116445	0	0	0.133847	0.144747	0.019276	0.023687	0.079182	0.086865	0.002506	0.004559
S2	0.00519568	0.0018883	0	0	0.060407	0.065902	0.021342	0.020853	0.076123	0.077637	0.009101	0.009998
S3	0.000485878	0.000917334	0	5.51e-05	0.036463	0.038629	0.022402	0.022126	0.041244	0.041694	0.011041	0.011677
S≥4			0	0	0.025784	0.026737	0.119384	0.126056	0.029606	0.026296	0.0783	0.09157
