# Supplementary material for: Robust cullin-RING ligase function is established by a multiplicity of poly-ubiquitylation pathways
Source: eLife. 2019 Dec 23;8:e51163. doi: 10.7554/eLife.51163 (PMC6975927; doi:10.7554/eLife.51163)
Supplement: Table 2—source data 1. [file elife-51163-table2-data1.xlsx]

## Sheet: AbsQuant Summary All Cell Lines
		293HEK TRex		293T/17		MRC-5		HeLa
	Protein	Concentration (nM)	SEM	Concentration (nM)	SEM	Concentration (nM)	SEM	Concentration (nM)	SEM
	ARIH1	203.494	9.68765	147.715	6.87283	155.762	10.2465	202.113	12.8945
	UBE2D	2098.82	141.585	1674.91	120.45	1772.69	42.9914	1875.15	7.47072
	UB2R1	69.7	3.27269	134.017	3.38193	82.1122	1.54454	82.9848	2.12168
	UB2R2	131.895	7.44548	98.5442	6.10287	116.806	1.10809	280.63	29.1059
	Cul1	298.385	19.1631	344.774	9.82847	176.453	1.26292	133.626	5.231
	Skp1	2322.31	149.455	1172.73	8.66792	1435.55	41.6653	1857.52	24.2649
	Reported Table: Uncertainty estimate SEM was rounded to 1 significant digit. Subsequently, the mean of the calculated concentrations was rounded so that the last reported digit is in the same place as the one digit uncertainty estimate SEM. Ref.: http://book.bionumbers.org/rigorous-rules-for-sloppy-calculations
		293HEK TRex		293T/17		MRC-5		HeLa			Last digit reported based on one digit uncertainty estimate					Significant digits of error measurement
	Protein	Concentration (nM)	SEM	Concentration (nM)	SEM	Concentration (nM)	SEM	Concentration (nM)	SEM		293HEK TRex	293T/17	MRC-5	HeLa		1
	ARIH1	200	10	148	7	160	10	200	10		2	3	2	2
	UBE2D1-4	2100	100	1700	100	1770	40	1875	7		2	2	3	4
	UB2R1	70	3	134	3	82	2	83	2		2	3	2	2
	UB2R2	132	7	99	6	117	1	280	30		3	2	3	2
	Cul1	300	20	340	10	176	1	134	5		2	2	3	3
	Skp1	2300	100	1173	9	1440	40	1860	20		2	4	3	3

## Sheet: Calculations 293HEK TRex
	Peptide To Standard Ratio - H/L				L/H Ratio				nM of cellular protein in 500µl lysate				nmoles in 500µl				nmoles per cell				moles per cell				cellular concentration M				cellular concentration nM
Protein Name	Rep 1	Rep 2	Rep 3	Rep 4	Rep 1	Rep 2	Rep 3	Rep 4	Rep 1	Rep 2	Rep 3	Rep 4	Rep 1	Rep 2	Rep 3	Rep 4	Rep 1	Rep 2	Rep 3	Rep 4	Rep 1	Rep 2	Rep 3	Rep 4	Rep 1	Rep 2	Rep 3	Rep 4	Rep 1	Rep 2	Rep 3	Rep 4		Protein Name	AVG	SEM	STDEV	95% CI
UB2R1	0.0324	0.02685	0.02935	0.0268	30.8642	37.2439	34.0716	37.3134	0.486	0.40275	0.44025	0.402	0.000243	0.000201375	0.000220125	0.000201	1.03338e-10	1.1856e-10	1.13146e-10	1.26974e-10	1.03338e-19	1.1856e-19	1.13146e-19	1.26974e-19	6.25151e-08	7.23138e-08	6.65253e-08	7.74455e-08	62.5151	72.3138	66.5253	77.4455		UB2R1	69.7	3.27269	6.54538	10.4152
UB2R2	0.0574	0.0507	0.0594	0.0504	17.4216	19.7239	16.835	19.8413	0.861	0.7605	0.891	0.756	0.0004305	0.00038025	0.0004455	0.000378	1.83075e-10	2.23874e-10	2.2899e-10	2.38787e-10	1.83075e-19	2.23874e-19	2.2899e-19	2.38787e-19	1.10752e-07	1.36548e-07	1.34637e-07	1.45644e-07	110.752	136.548	134.637	145.644		UB2R2	131.895	7.44548	14.891	23.6948
UBE2D	0.262	0.2465	0.2876	0.2413	3.81679	4.0568	3.47705	4.14422	13.1	12.325	14.38	12.065	0.00655	0.0061625	0.00719	0.0060325	2.78546e-09	3.6282e-09	3.69571e-09	3.8108e-09	2.78546e-18	3.6282e-18	3.69571e-18	3.8108e-18	1.68508e-06	2.21296e-06	2.17293e-06	2.32433e-06	1685.08	2212.96	2172.93	2324.33		UBE2D	2098.82	141.585	283.17	450.587
ARIH1	0.09245	0.08355	0.09215	0.0698	10.8167	11.9689	10.8519	14.3266	1.38675	1.25325	1.38225	1.047	0.000693375	0.000626625	0.000691125	0.0005235	2.94865e-10	3.68928e-10	3.55243e-10	3.30701e-10	2.94865e-19	3.68928e-19	3.55243e-19	3.30701e-19	1.7838e-07	2.25021e-07	2.08869e-07	2.01705e-07	178.38	225.021	208.869	201.705		ARIH1	203.494	9.68765	19.3753	30.8304
Cul1	0.109033	0.103633	0.1178	0.0973667	9.17151	9.6494	8.48896	10.2705	1.88082	1.78767	2.03205	1.67957	0.000940412	0.000893837	0.00101603	0.000839787	3.9992e-10	5.26251e-10	5.22244e-10	5.30504e-10	3.9992e-19	5.26251e-19	5.22244e-19	5.30504e-19	2.41934e-07	3.20977e-07	3.07059e-07	3.23571e-07	241.934	320.977	307.059	323.571		Cul1	298.385	19.1631	38.3262	60.9855
Skp1	0.25005	0.2389	0.26725	0.2229	3.9992	4.18585	3.74181	4.48632	14.6654	14.0115	15.6742	13.0731	0.00733272	0.00700574	0.00783711	0.00653654	3.11831e-09	4.12466e-09	4.02832e-09	4.12921e-09	3.11831e-18	4.12466e-18	4.02832e-18	4.12921e-18	1.88644e-06	2.51576e-06	2.3685e-06	2.51854e-06	1886.44	2515.76	2368.5	2518.54		Skp1	2322.31	149.455	298.911	475.634
CEDEX HiRes Cell Counter Measurements
293HEK TRex	Rep 1	Rep 2	Rep 3	Rep 4
Total cell count (cells/ml)	4703000	3397000	3891000	3166000
Viable Cell count (cells/ml)	4668000	3357000	3842000	3119000
Viability (%)	0.992558	0.988225	0.987407	0.985155
Aggregate Rate (%)	0.29	0.25	0.32	0.275
Avg Diameter (µm)	14.67	14.63	14.81	14.63
Avg Diameter (m)	1.467e-05	1.463e-05	1.481e-05	1.463e-05
p (for volume calculations)	3.1415	3.1415	3.1415	3.1415
Avg Cell Volume (m^3)	1.65301e-15	1.63953e-15	1.70079e-15	1.63953e-15
Avg Cell Volume (L)	1.65301e-12	1.63953e-12	1.70079e-12	1.63953e-12
Total cells processed (per 500µl)	2351500	1698500	1945500	1583000
Recombinant protein	Concentration in 500 µl lysate
	nM
UB2R1	15
UB2R2	15
UBE2D	50
ARIH1	15
Cul1	17.25
Skp1	58.65

## Sheet: Calculations 293T 17
	Peptide To Standard Ratio - H/L			L/H Ratio			nM of cellular protein in 500µl lysate			nmoles in 500µl			nmoles per cell			moles per cell			cellular concentration M			cellular concentration nM
Protein Name	Rep 1	Rep 2	Rep 3	Rep 1	Rep 2	Rep 3	Rep 1	Rep 2	Rep 3	Rep 1	Rep 2	Rep 3	Rep 1	Rep 2	Rep 3	Rep 1	Rep 2	Rep 3	Rep 1	Rep 2	Rep 3	Rep 1	Rep 2	Rep 3		Protein Name	AVG	SEM	STDEV	95% CI
UB2R1	0.1153	0.1133	0.1094	8.88099	8.31255	9.01713	2.815	3.0075	2.7725	0.0014075	0.00150375	0.00138625	1.87567e-10	2.00393e-10	1.84735e-10	1.87567e-19	2.00393e-19	1.84735e-19	1.31678e-07	1.40683e-07	1.2969e-07	131.678	140.683	129.69		UB2R1	134.017	3.38193	5.85768	14.5513
UB2R2	0.0793	0.0893	0.0788	12.6103	10.5597	12.6904	1.9825	2.3675	1.97	0.00099125	0.00118375	0.000985	1.32096e-10	1.57749e-10	1.31263e-10	1.32096e-19	1.57749e-19	1.31263e-19	9.2736e-08	1.10745e-07	9.21513e-08	92.736	110.745	92.1513		UB2R2	98.5442	6.10287	10.5705	26.2585
UBE2D	2.0438	2.6396	2.4469	0.489285	0.38997	0.391681	30.657	38.4645	38.2965	0.0153285	0.0192322	0.0191483	2.04271e-09	2.56293e-09	2.55174e-09	2.04271e-18	2.56293e-18	2.55174e-18	1.43405e-06	1.79927e-06	1.79141e-06	1434.05	1799.27	1791.41		UBE2D	1674.91	120.45	208.625	518.252
ARIH1	0.1004	0.1097	0.10235	7.2798	8.04835	8.52341	3.43416	3.10623	2.9331	0.00171708	0.00155311	0.00146655	2.28822e-10	2.06971e-10	1.95436e-10	2.28822e-19	2.06971e-19	1.95436e-19	1.60641e-07	1.45301e-07	1.37202e-07	160.641	145.301	137.202		ARIH1	147.715	6.87283	11.9041	29.5714
Cul1	0.270067	0.264367	0.277667	3.51815	3.84757	3.80446	7.78818	7.12137	7.20208	0.00389409	0.00356069	0.00360104	5.18935e-10	4.74505e-10	4.79883e-10	5.18935e-19	4.74505e-19	4.79883e-19	3.6431e-07	3.33119e-07	3.36894e-07	364.31	333.119	336.894		Cul1	344.774	9.82847	17.0234	42.2885
Skp1	0.23705	0.2362	0.23925	4.24448	4.13736	4.1841	24.738	25.3785	25.095	0.012369	0.0126892	0.0125475	1.64832e-09	1.691e-09	1.67211e-09	1.64832e-18	1.691e-18	1.67211e-18	1.15718e-06	1.18714e-06	1.17388e-06	1157.18	1187.14	1173.88		Skp1	1172.73	8.66792	15.0133	37.295
CEDEX HiRes Cell Counter Measurements
293T/17	Rep1-3
Total cell count (cells/ml)	7504000
Viable Cell count (cells/ml)	7358000
Viability (%)	0.981
Aggregate Rate (%)	0.297
Avg Diameter (µm)	13.96
Avg Diameter (m)	1.396e-05
p (for volume calculations)	3.1415
Avg Cell Volume (m^3)	1.42443e-15
Avg Cell Volume (L)	1.42443e-12
Recombinant Protein	Stock Conc.
	nM
UB2R1	25
UB2R2	25
UBE2D	15
ARIH1	25
Cul1	27.4
Skp1	105

## Sheet: Calculations MRC5
	Peptide To Standard Ratio - H/L			L/H Ratio			nM of cellular protein in 500µl lysate			nmoles in 500µl			nmoles per cell			moles per cell			cellular concentration M			cellular concentration nM
Protein Name	Rep 1	Rep 2	Rep 3	Rep 1	Rep 2	Rep 3	Rep 1	Rep 2	Rep 3	Rep 1	Rep 2	Rep 3	Rep 1	Rep 2	Rep 3	Rep 1	Rep 2	Rep 3	Rep 1	Rep 2	Rep 3	Rep 1	Rep 2	Rep 3		Protein Name	AVG	SEM	STDEV	95% CI
UB2R1	0.2158	0.2131	0.2028	4.63392	4.69263	4.93097	1.7264	1.7048	1.6224	0.0008632	0.0008524	0.0008112	2.42676e-10	2.3964e-10	2.28057e-10	2.42676e-19	2.3964e-19	2.28057e-19	8.4153e-08	8.31001e-08	7.90836e-08	84.153	83.1001	79.0836		UB2R1	82.1122	1.54454	2.67522	6.64562
UB2R2	0.3005	0.3039	0.2942	3.32779	3.29056	3.39905	2.404	2.4312	2.3536	0.001202	0.0012156	0.0011768	3.37925e-10	3.41749e-10	3.30841e-10	3.37925e-19	3.41749e-19	3.30841e-19	1.17182e-07	1.18508e-07	1.14726e-07	117.182	118.508	114.726		UB2R2	116.806	1.10809	1.91927	4.76772
UBE2D	0.8766	0.9512	0.8997	1.14077	1.0513	1.11148	35.064	38.048	35.988	0.017532	0.019024	0.017994	4.92887e-09	5.34833e-09	5.05876e-09	4.92887e-18	5.34833e-18	5.05876e-18	1.70919e-06	1.85464e-06	1.75423e-06	1709.19	1854.64	1754.23		UBE2D	1772.69	42.9914	74.4632	184.977
ARIH1	0.4477	0.3573	0.3933	2.23364	2.79877	2.54259	3.5816	2.8584	3.1464	0.0017908	0.0014292	0.0015732	5.03458e-10	4.01799e-10	4.42283e-10	5.03458e-19	4.01799e-19	4.42283e-19	1.74584e-07	1.39332e-07	1.53371e-07	174.584	139.332	153.371		ARIH1	155.762	10.2465	17.7474	44.087
Cul1	0.2605	0.254867	0.260333	3.83877	3.92362	3.84123	3.647	3.56813	3.64467	0.0018235	0.00178407	0.00182233	5.12651e-10	5.01565e-10	5.12323e-10	5.12651e-19	5.01565e-19	5.12323e-19	1.77772e-07	1.73928e-07	1.77659e-07	177.772	173.928	177.659		Cul1	176.453	1.26292	2.18744	5.43389
Skp1	0.64845	0.60225	0.58995	1.54214	1.66044	1.69506	31.1256	28.908	28.3176	0.0155628	0.014454	0.0141588	4.37526e-09	4.06354e-09	3.98055e-09	4.37526e-18	4.06354e-18	3.98055e-18	1.51721e-06	1.40911e-06	1.38034e-06	1517.21	1409.11	1380.34		Skp1	1435.55	41.6653	72.1664	179.271
CEDEX HiRes Cell Counter Measurements
MRC-5	Rep1-3
Total cell count (cells/ml)	3557000
Viable Cell count (cells/ml)	3115000
Viability (%)	0.875738
Aggregate Rate (%)	0.29
Avg Diameter (µm)	17.66
Avg Diameter (m)	1.766e-05
p (for volume calculations)	3.1415
Avg Cell Volume (m^3)	2.88375e-15
Avg Cell Volume (L)	2.88375e-12
Recombinant Protein	Stock Conc.
	nM
UB2R1	8
UB2R2	8
UBE2D	40
ARIH1	8
Cul1	14
Skp1	48

## Sheet: Calculations HeLa
	Peptide To Standard Ratio - H/L		L/H Ratio		nM of cellular protein in 500µl lysate		nmoles in 500µl		nmoles per cell		moles per cell		cellular concentration M		cellular concentration nM
Protein Name	Rep 1	Rep 2	Rep 1	Rep 2	Rep 1	Rep 2	Rep 1	Rep 2	Rep 1	Rep 2	Rep 1	Rep 2	Rep 1	Rep 2	Rep 1	Rep 2		Protein Name	AVG	SEM	STDEV	95% CI
UB2R1	0.1353	0.1424	7.39098	7.02247	1.353	1.424	0.0006765	0.000712	2.41607e-10	2.54286e-10	2.41607e-19	2.54286e-19	8.08631e-08	8.51065e-08	80.8631	85.1065		UB2R1	82.9848	2.12168	3.00052	26.9586
UB2R2	0.42085	0.51825	2.37614	1.92957	4.2085	5.1825	0.00210425	0.00259125	7.51518e-10	9.25446e-10	7.51518e-19	9.25446e-19	2.51524e-07	3.09736e-07	251.524	309.736		UB2R2	280.63	29.1059	41.162	369.826
UBE2D	0.63	0.625	1.5873	1.6	31.5	31.25	0.01575	0.015625	5.625e-09	5.58036e-09	5.625e-18	5.58036e-18	1.88262e-06	1.86768e-06	1882.62	1867.68		UBE2D	1875.15	7.47072	10.5652	94.9245
ARIH1	0.35975	0.3166	2.77971	3.15856	3.5975	3.166	0.00179875	0.001583	6.42411e-10	5.65357e-10	6.42411e-19	5.65357e-19	2.15007e-07	1.89218e-07	215.007	189.218		ARIH1	202.113	12.8945	18.2355	163.84
Cul1	0.129075	0.11935	7.74743	8.37872	2.32335	2.1483	0.00116168	0.00107415	4.14884e-10	3.83625e-10	4.14884e-19	3.83625e-19	1.38857e-07	1.28395e-07	138.857	128.395		Cul1	133.626	5.231	7.39775	66.4661
Skp1	0.511233	0.524767	1.95605	1.90561	30.674	31.486	0.015337	0.015743	5.4775e-09	5.6225e-09	5.4775e-18	5.6225e-18	1.83326e-06	1.88178e-06	1833.26	1881.78		Skp1	1857.52	24.2649	34.3158	308.315
CEDEX HiRes Cell Counter Measurements
HeLa	Rep1-2
Total cell count (cells/ml)	2800000
Viable Cell count (cells/ml)	2733000
Viability (%)	0.976071
Aggregate Rate (%)	0.119
Avg Diameter (µm)	17.87
Avg Diameter (m)	1.787e-05
p (for volume calculations)	3.1415
Avg Cell Volume (m^3)	2.98785e-15
Avg Cell Volume (L)	2.98785e-12
Recombinant Protein	Stock Conc.
	nM
UB2R1	10
UB2R2	10
UBE2D	50
ARIH1	10
Cul1	18
Skp1	60

## Sheet: 293HEK TRex Peptide_Ratio_Resul
Protein_Name	peptides	293TRex_1	293TRex_2	293TRex_3	293TRex_4
ARIH1	EVNEVIQNPATITR, DISQDSLQDIK	0.09245	0.08355	0.09215	0.0698
Cul1	AGIQQVYTR, LLIQAAIVR, FYTQQWEDYR	0.109033	0.103633	0.1178	0.0973667
Skp1	GLLDVTCK, NDFTEEEEAQVR	0.25005	0.2389	0.26725	0.2229
UB2R1	ALLLELK, GLQEEPVEGFR	0.0324	0.02685	0.02935	0.0268
UB2R2	SLQEEPVEGFR	0.0574	0.0507	0.0594	0.0504
UBE2D	IYHPNINSNGSICLDILR	0.262	0.2465	0.2876	0.2413

## Sheet: 293T 17 Peptide_Ratio_Results
Protein_Name	peptides	293T_1	293T_2	293T_3
ARIH1	EVNEVIQNPATITR, DISQDSLQDIK	0.1004	0.1097	0.10235
Cul1	AGIQQVYTR, GQTPGGAQFVGLELYK, LLIQAAIVR	0.270067	0.264367	0.277667
Skp1	GLLDVTCK, NDFTEEEEAQVR	0.23705	0.2362	0.23925
UB2R1	ALLLELK	0.1153	0.1133	0.1094
UB2R2	SLQEEPVEGFR	0.0793	0.0893	0.0788
UBE2D	IYHPNINSNGSICLDILR	2.0438	2.6396	2.4469

## Sheet: MRC5 Peptide_Ratio_Results
Protein_Name	peptides	MRC5_1	MRC5_2	MRC5_3
ARIH1	DISQDSLQDIK	0.4477	0.3573	0.3933
Cul1	AGIQQVYTR, LLIQAAIVR, FYTQQWEDYR	0.2605	0.254867	0.260333
Skp1	GLLDVTCK, NDFTEEEEAQVR	0.64845	0.60225	0.58995
UB2R1	ALLLELK, GLQEEPVEGFR	0.2158	0.2131	0.2028
UB2R2	SLQEEPVEGFR	0.3005	0.3039	0.2942
UBE2D	IYHPNINSNGSICLDILR	0.8766	0.9512	0.8997

## Sheet: HeLa Peptide_Ratio_Results
Protein_Name	peptides	Hela_1	Hela_2
ARIH1	EVNEVIQNPATITR, DISQDSLQDIK	0.35975	0.3166
Cul1	AGIQQVYTR, GQTPGGAQFVGLELYK, LLIQAAIVR, FYTQQWEDYR	0.129075	0.11935
Skp1	GLLDVTCK, LQSSDGEIFEVDVEIAK, NDFTEEEEAQVR	0.511233	0.524767
UB2R1	ALLLELK, GLQEEPVEGFR	0.1353	0.1424
UB2R2	SLQEEPVEGFR, FPIDYPYSPPTFR	0.42085	0.51825
UBE2D	IYHPNINSNGSICLDILR	0.63	0.625
